# Supplementary material for: Generation and Reactions of ε-Carbonyl Cations via Group 13 Catalysis
Source: MDPI journal article supplement (doi:10.3390/molecules27103078), 2022-05-11
Supplement: s1 [file s1]

## Supporting Information for

### Generation and Reactions of $\epsilon$ -Carbonyl Cations via Group 13 Catalysis

Page M. Penner and James R. Green\*

Department of Chemistry and Biochemistry, University of Windsor, Windsor, ON, N9B 3P4, Canada

\*Correspondence: [jgreen@uwindsor.ca](mailto:jgreen@uwindsor.ca)

|                                                                           |         |
|---------------------------------------------------------------------------|---------|
| $^1\text{H}$ and $^{13}\text{C}$ NMR Spectra for Newly Prepared Compounds | S2      |
| $^1\text{H}$ and $^{13}\text{C}$ NMR Spectra - <b>8c</b>                  | S2      |
| $^1\text{H}$ and $^{13}\text{C}$ NMR Spectra – <b>10</b>                  | S4      |
| $^1\text{H}$ and $^{13}\text{C}$ NMR Spectra - <b>12a</b>                 | S6      |
| $^1\text{H}$ and $^{13}\text{C}$ NMR Spectra – <b>12b</b>                 | S8      |
| $^1\text{H}$ and $^{13}\text{C}$ NMR Spectra – <b>12c</b>                 | S10     |
| $^1\text{H}$ and $^{13}\text{C}$ NMR Spectra – <b>12d</b>                 | S12     |
| $^1\text{H}$ and $^{13}\text{C}$ NMR Spectra – <b>12e/12e'</b>            | S14     |
| $^1\text{H}$ and $^{13}\text{C}$ NMR Spectra – <b>12f</b>                 | S16     |
| $^1\text{H}$ and $^{13}\text{C}$ NMR Spectra – <b>12g</b>                 | S18     |
| $^1\text{H}$ and $^{13}\text{C}$ NMR Spectra – <b>13a</b>                 | S20     |
| $^1\text{H}$ and $^{13}\text{C}$ NMR Spectra – <b>13b</b>                 | S22     |
| $^1\text{H}$ and $^{13}\text{C}$ NMR Spectra – <b>13c</b>                 | S24     |
| $^1\text{H}$ and $^{13}\text{C}$ NMR Spectra – <b>13d</b>                 | S26     |
| $^1\text{H}$ and $^{13}\text{C}$ NMR Spectra – <b>13e/13e'</b>            | S28     |
| $^1\text{H}$ and $^{13}\text{C}$ NMR Spectra – <b>13f</b>                 | S30     |
| $^1\text{H}$ and $^{13}\text{C}$ NMR Spectra – <b>13g</b>                 | S32     |
| $^1\text{H}$ and $^{13}\text{C}$ NMR Spectra – <b>13h</b>                 | S34     |
| <br>Cartesian Coordinates of Calculationally Optimized Structures         | <br>S36 |

pmp.098 30, 1H, Br-CH<sub>2</sub>-C=C-C=C-C(O)Ph, 500 MHz, 3/17/22

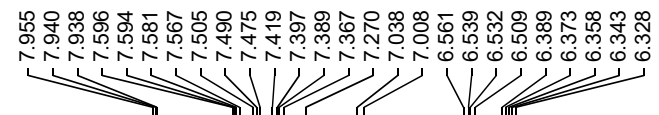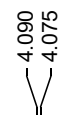

500 MHz, CDCl<sub>3</sub>

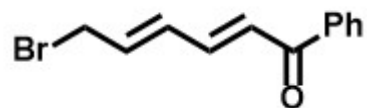

**8c**

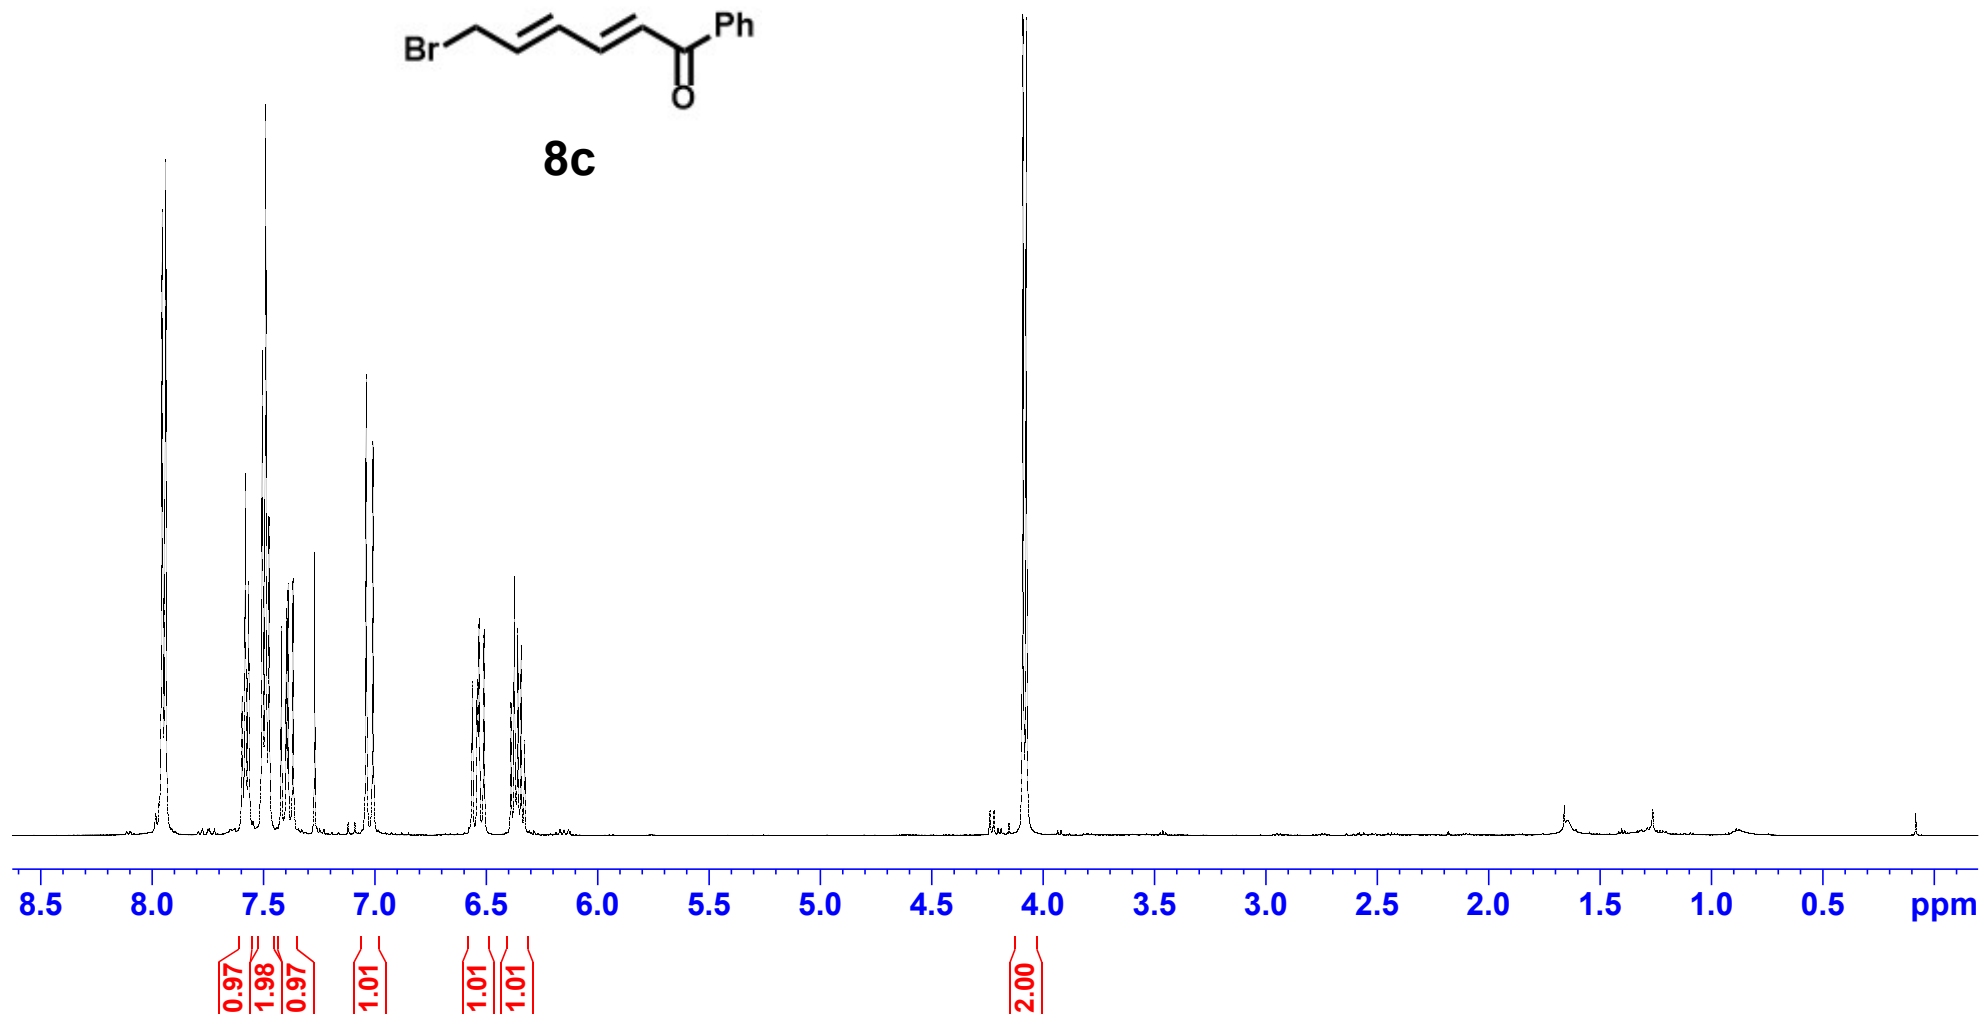

pmp.098 31, <sup>13</sup>C, Br-CH<sub>2</sub>-C=C-C=C-C(O)Ph, 500/125 MHz, 3/17/22

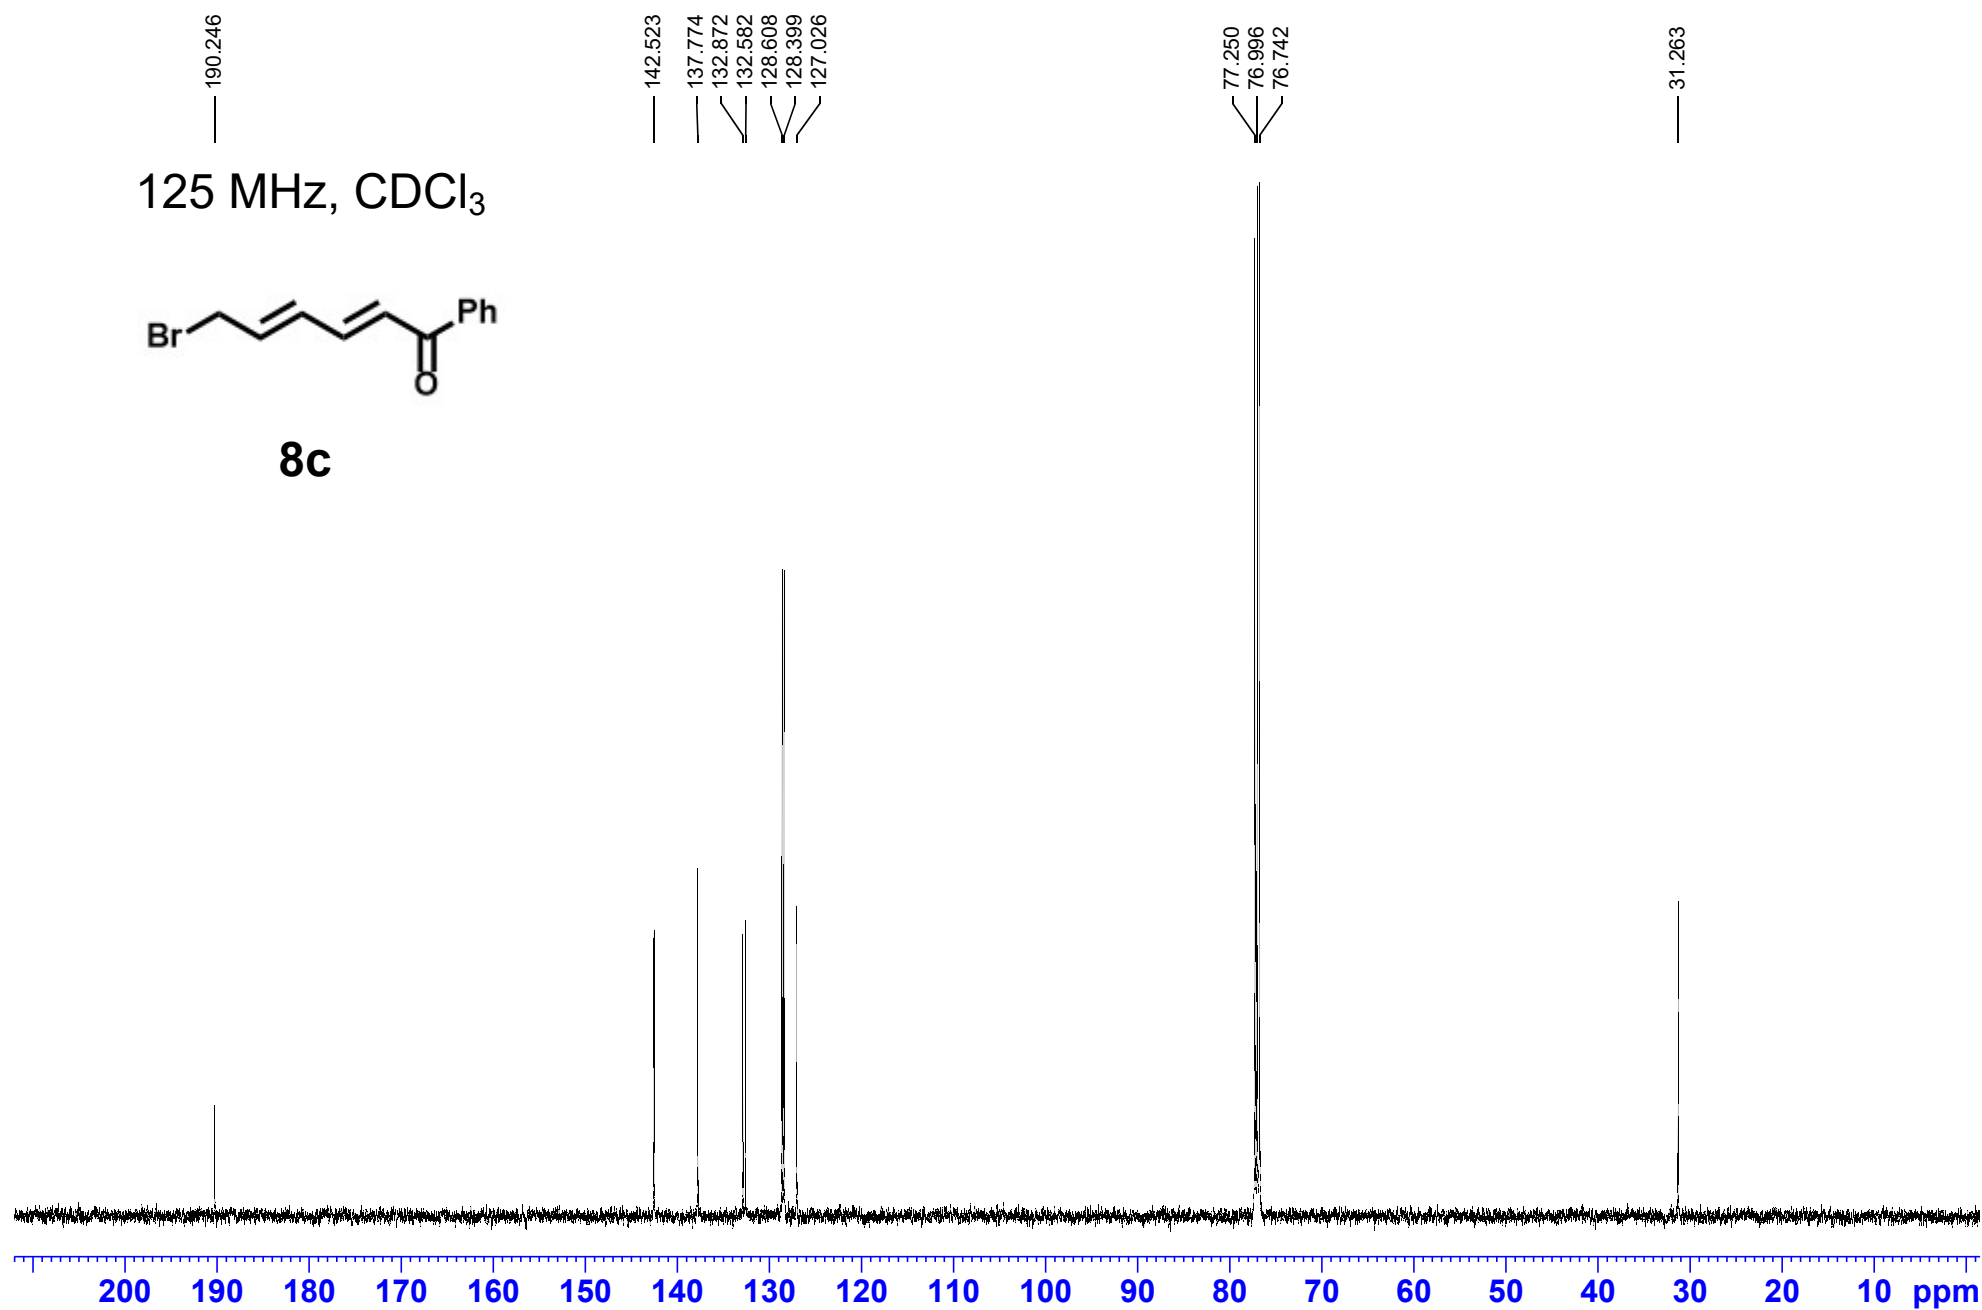

pmp.143b SM C  
1D 1H 300 MHz B82

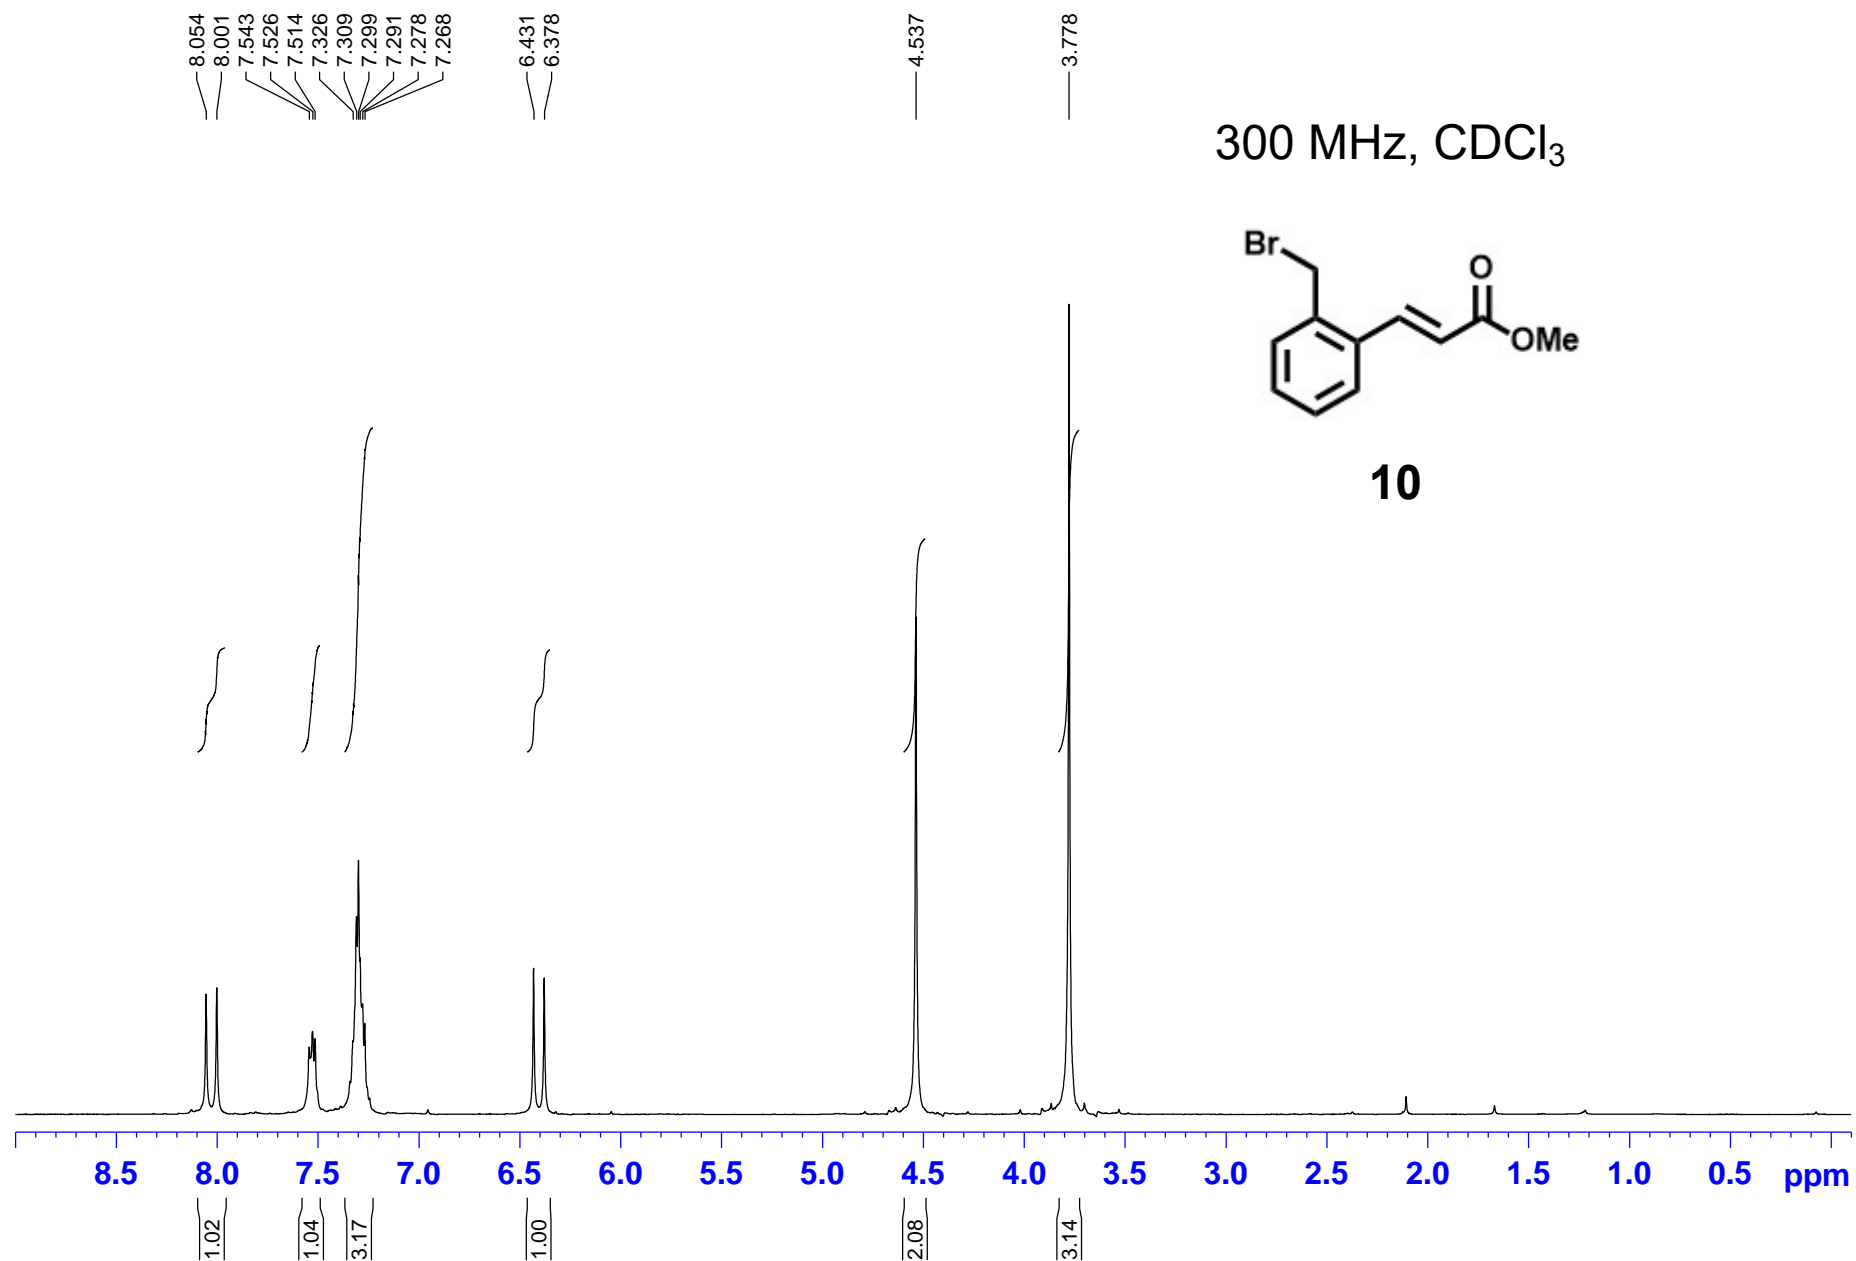

pmp.143bc 20 SM C  
13C 1D 300 MHz B82

166.725

140.458

136.409

133.426

130.497

130.120

129.059

127.028

120.352

51.614

30.404

75 MHz, CDCl<sub>3</sub>

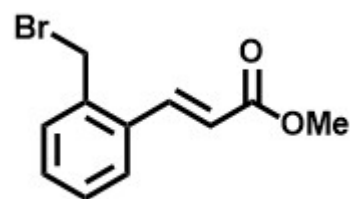

10

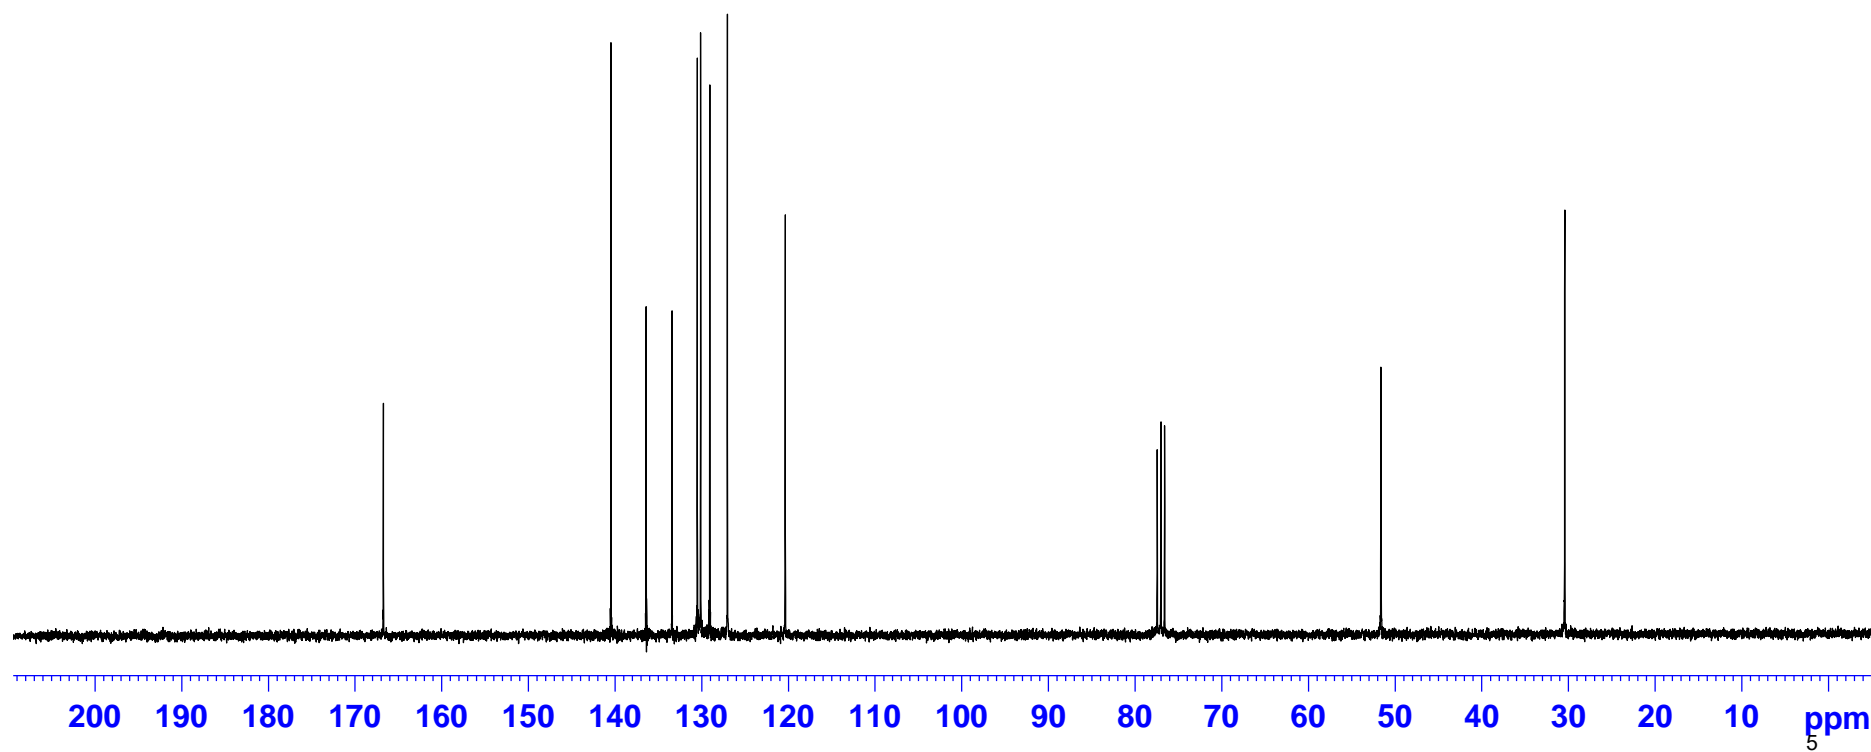

7.317  
7.295  
7.287  
7.265  
— 6.898  
6.258  
6.246  
6.234  
6.228  
6.216  
6.204  
6.040  
6.018  
6.014  
6.010  
5.988  
5.780  
5.749

4.234  
4.220  
4.205  
4.191

3.515  
3.503

2.307  
2.277

1.319  
1.305  
1.291

500 MHz, CDCl<sub>3</sub>

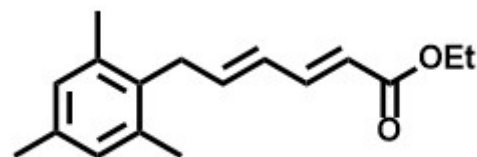

**12a**

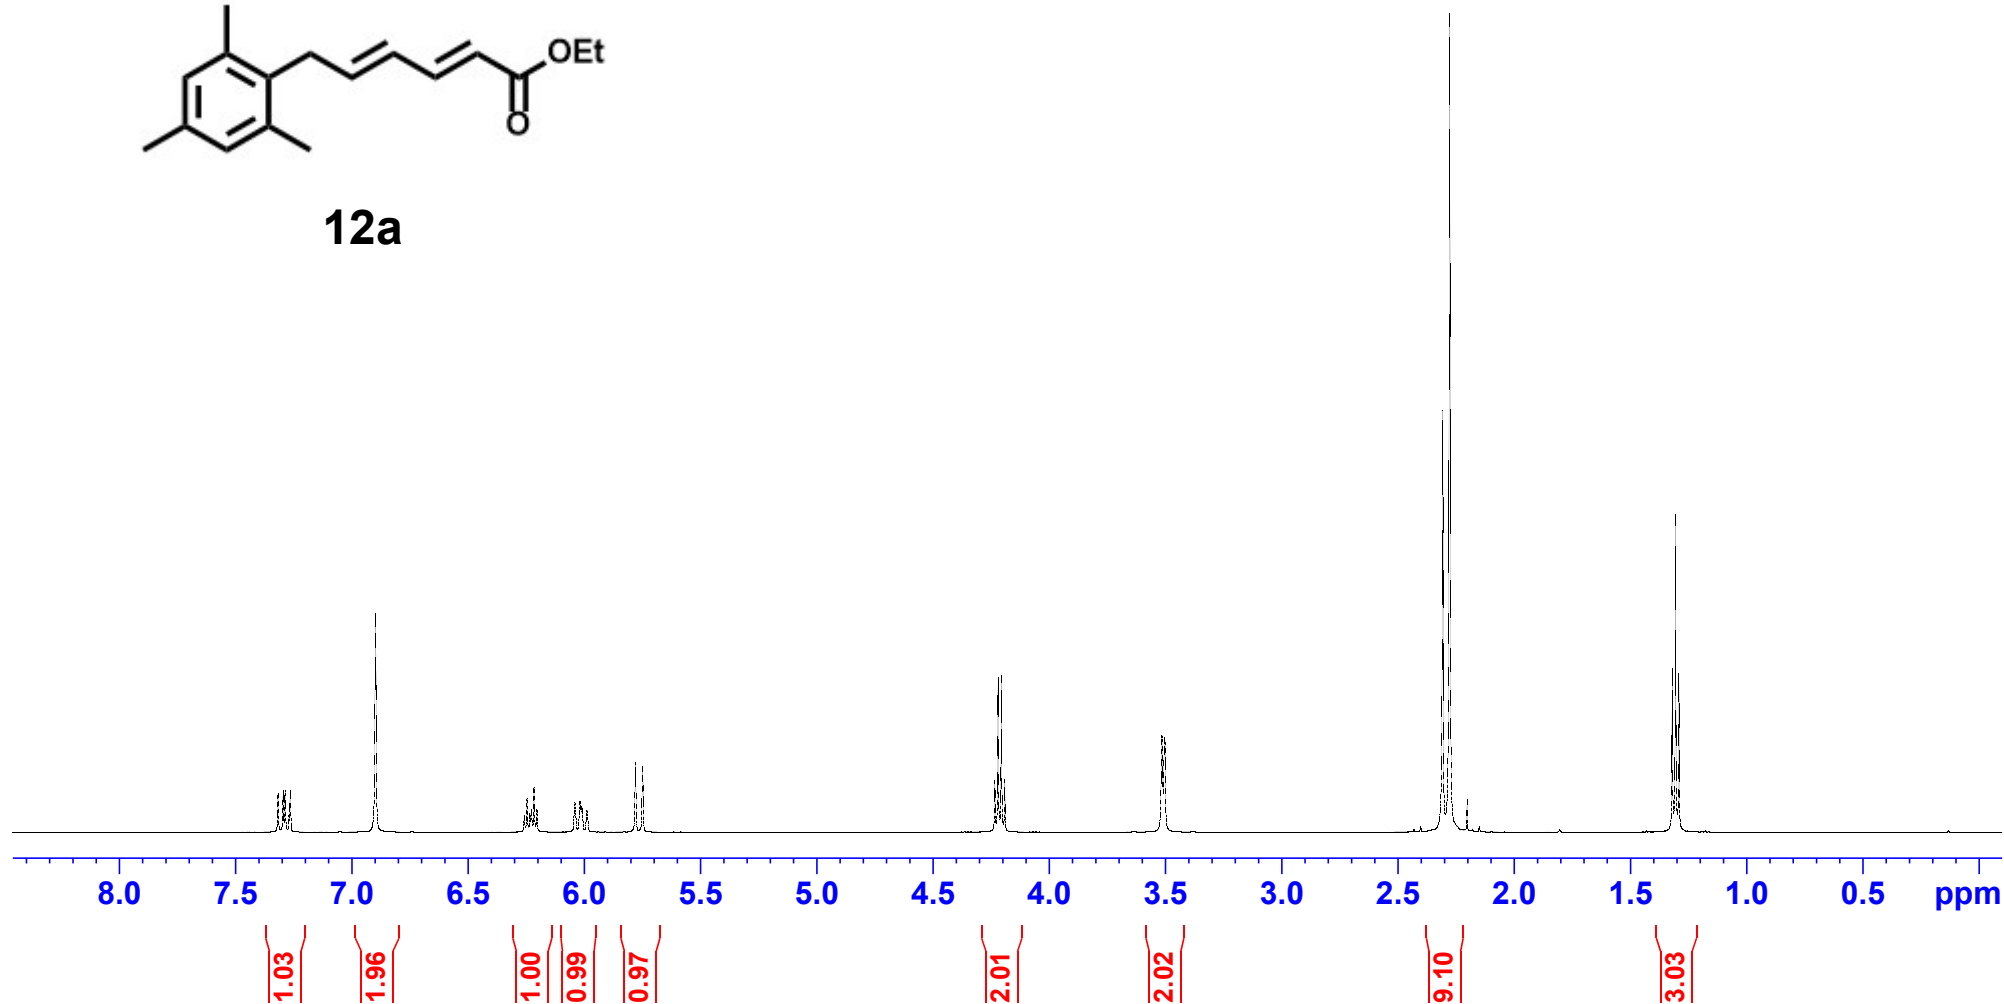

pmp.031 21, <sup>13</sup>C, sorbate + mesitylene adduct, 500/125, 1/15/22

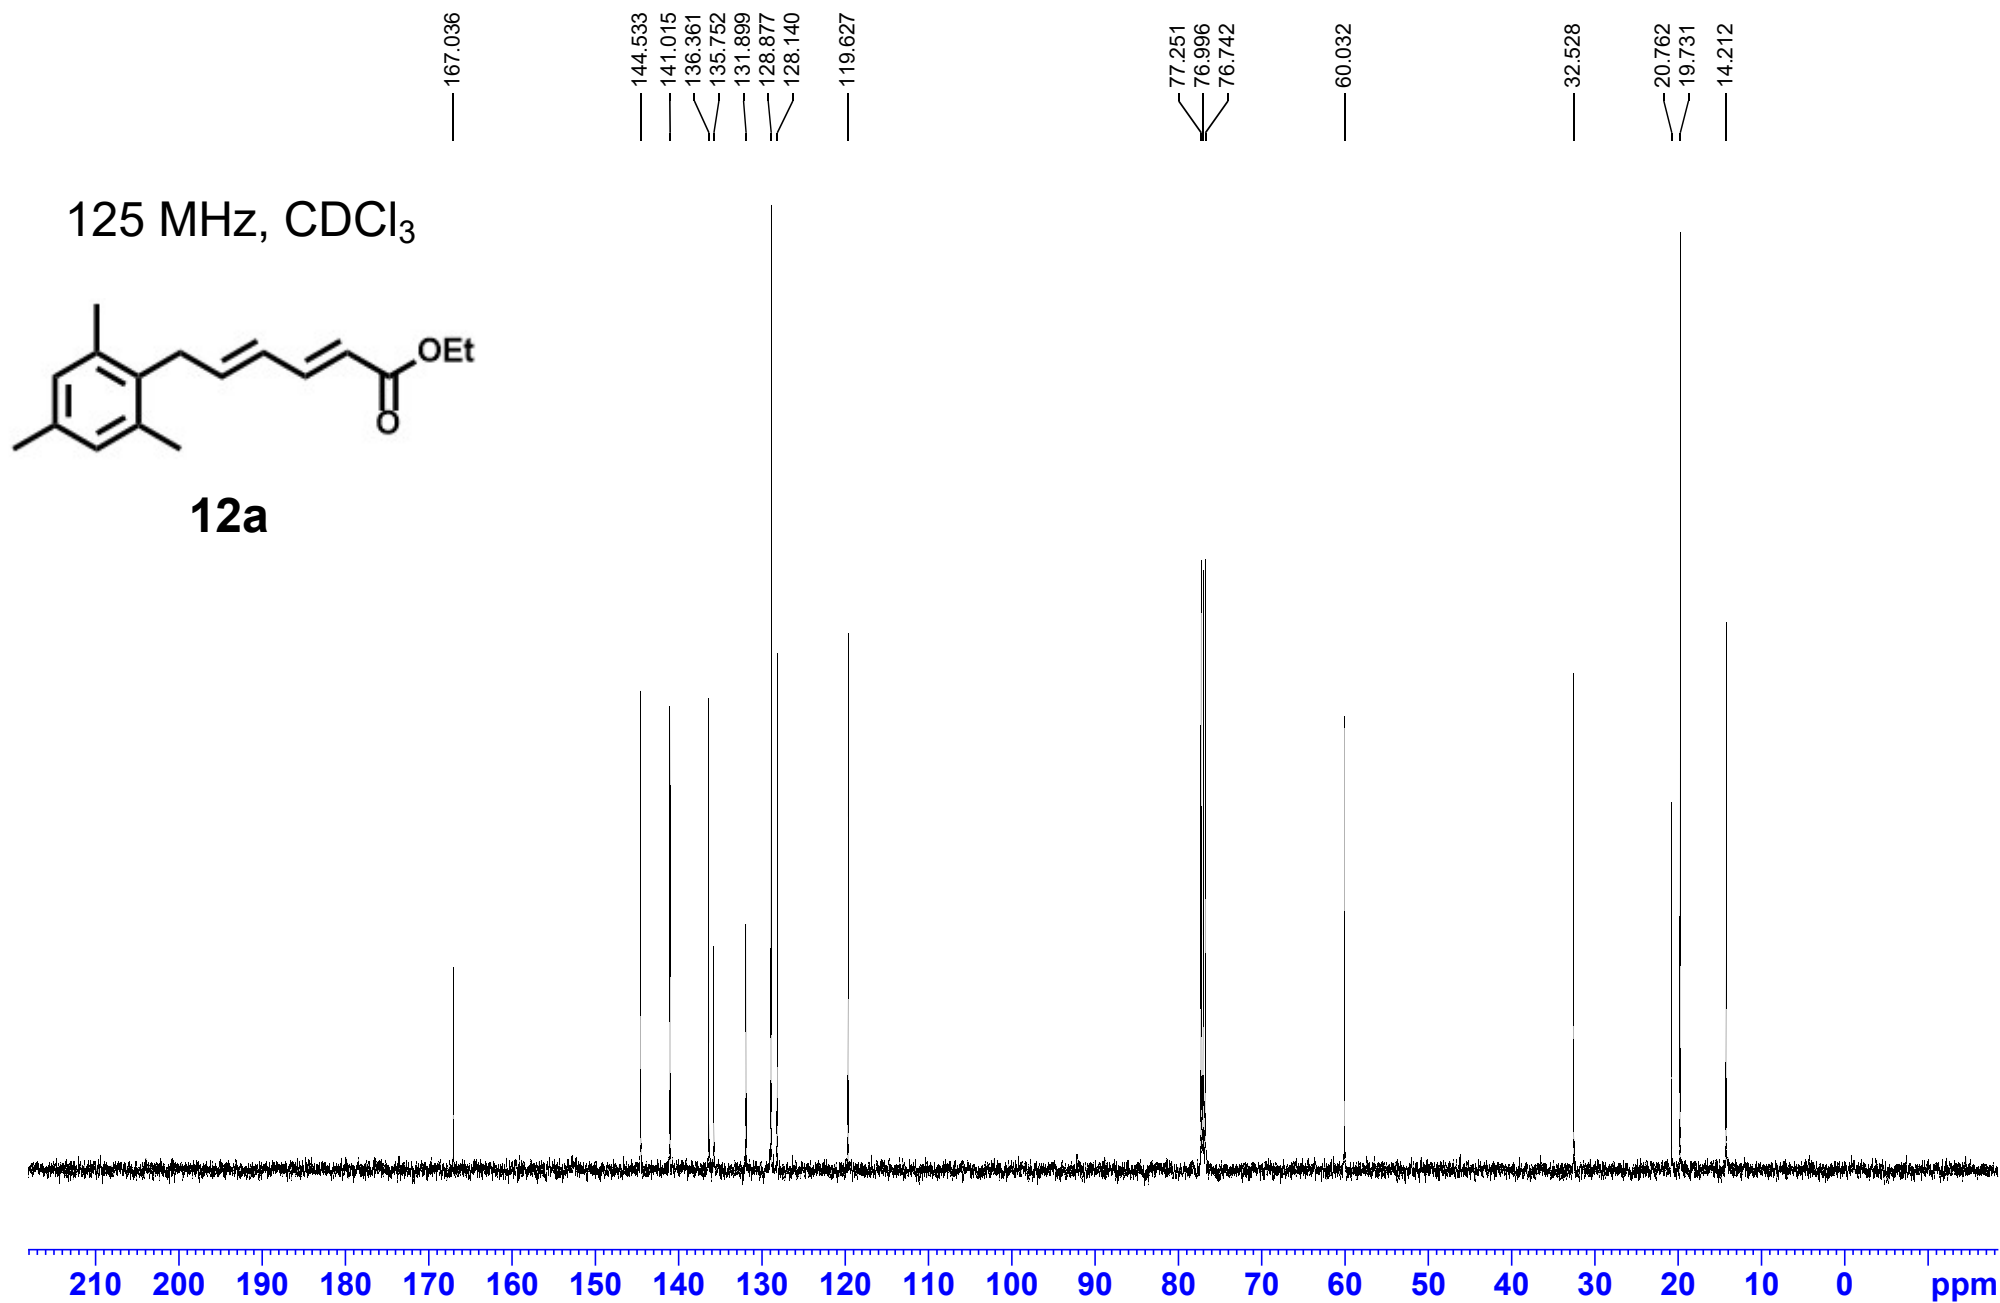

pmp.040 20, sorbate + p-xylene, 1H, 500, 1/24/22

7.329  
7.307  
7.298  
7.276  
7.270  
7.076  
7.061  
6.992  
6.976  
6.946  
6.288  
6.275  
6.258  
6.245  
6.232  
6.162  
6.140  
6.132  
6.110  
5.825  
5.794

4.232  
4.218  
4.204  
4.189

3.473  
3.460

2.319  
2.251

1.316  
1.302  
1.288

500 MHz, CDCl<sub>3</sub>

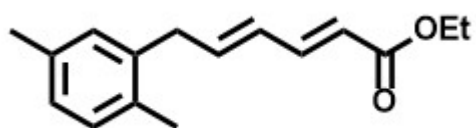

**12b**

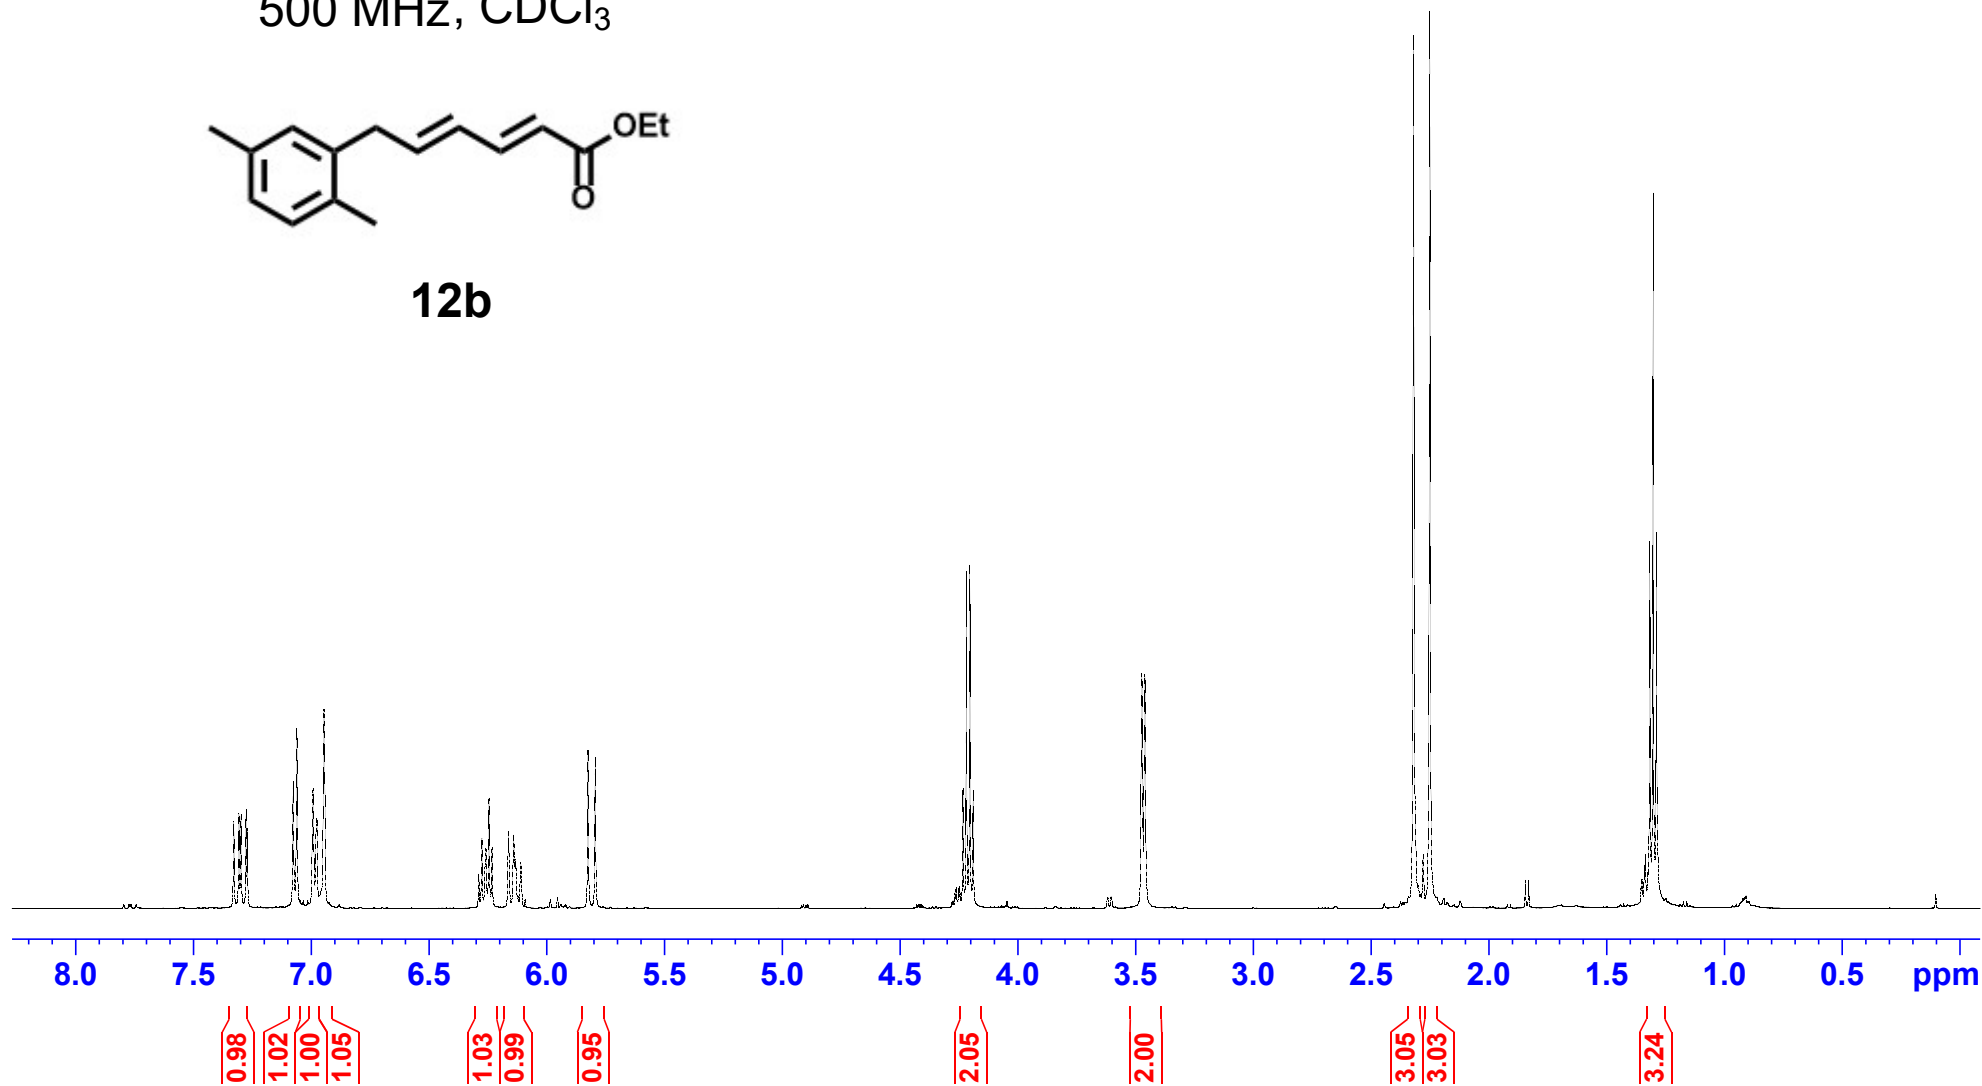

pmp.040 21, sorbate + p-xylene,  $^{13}\text{C}$ , 500/125, 1/24/22

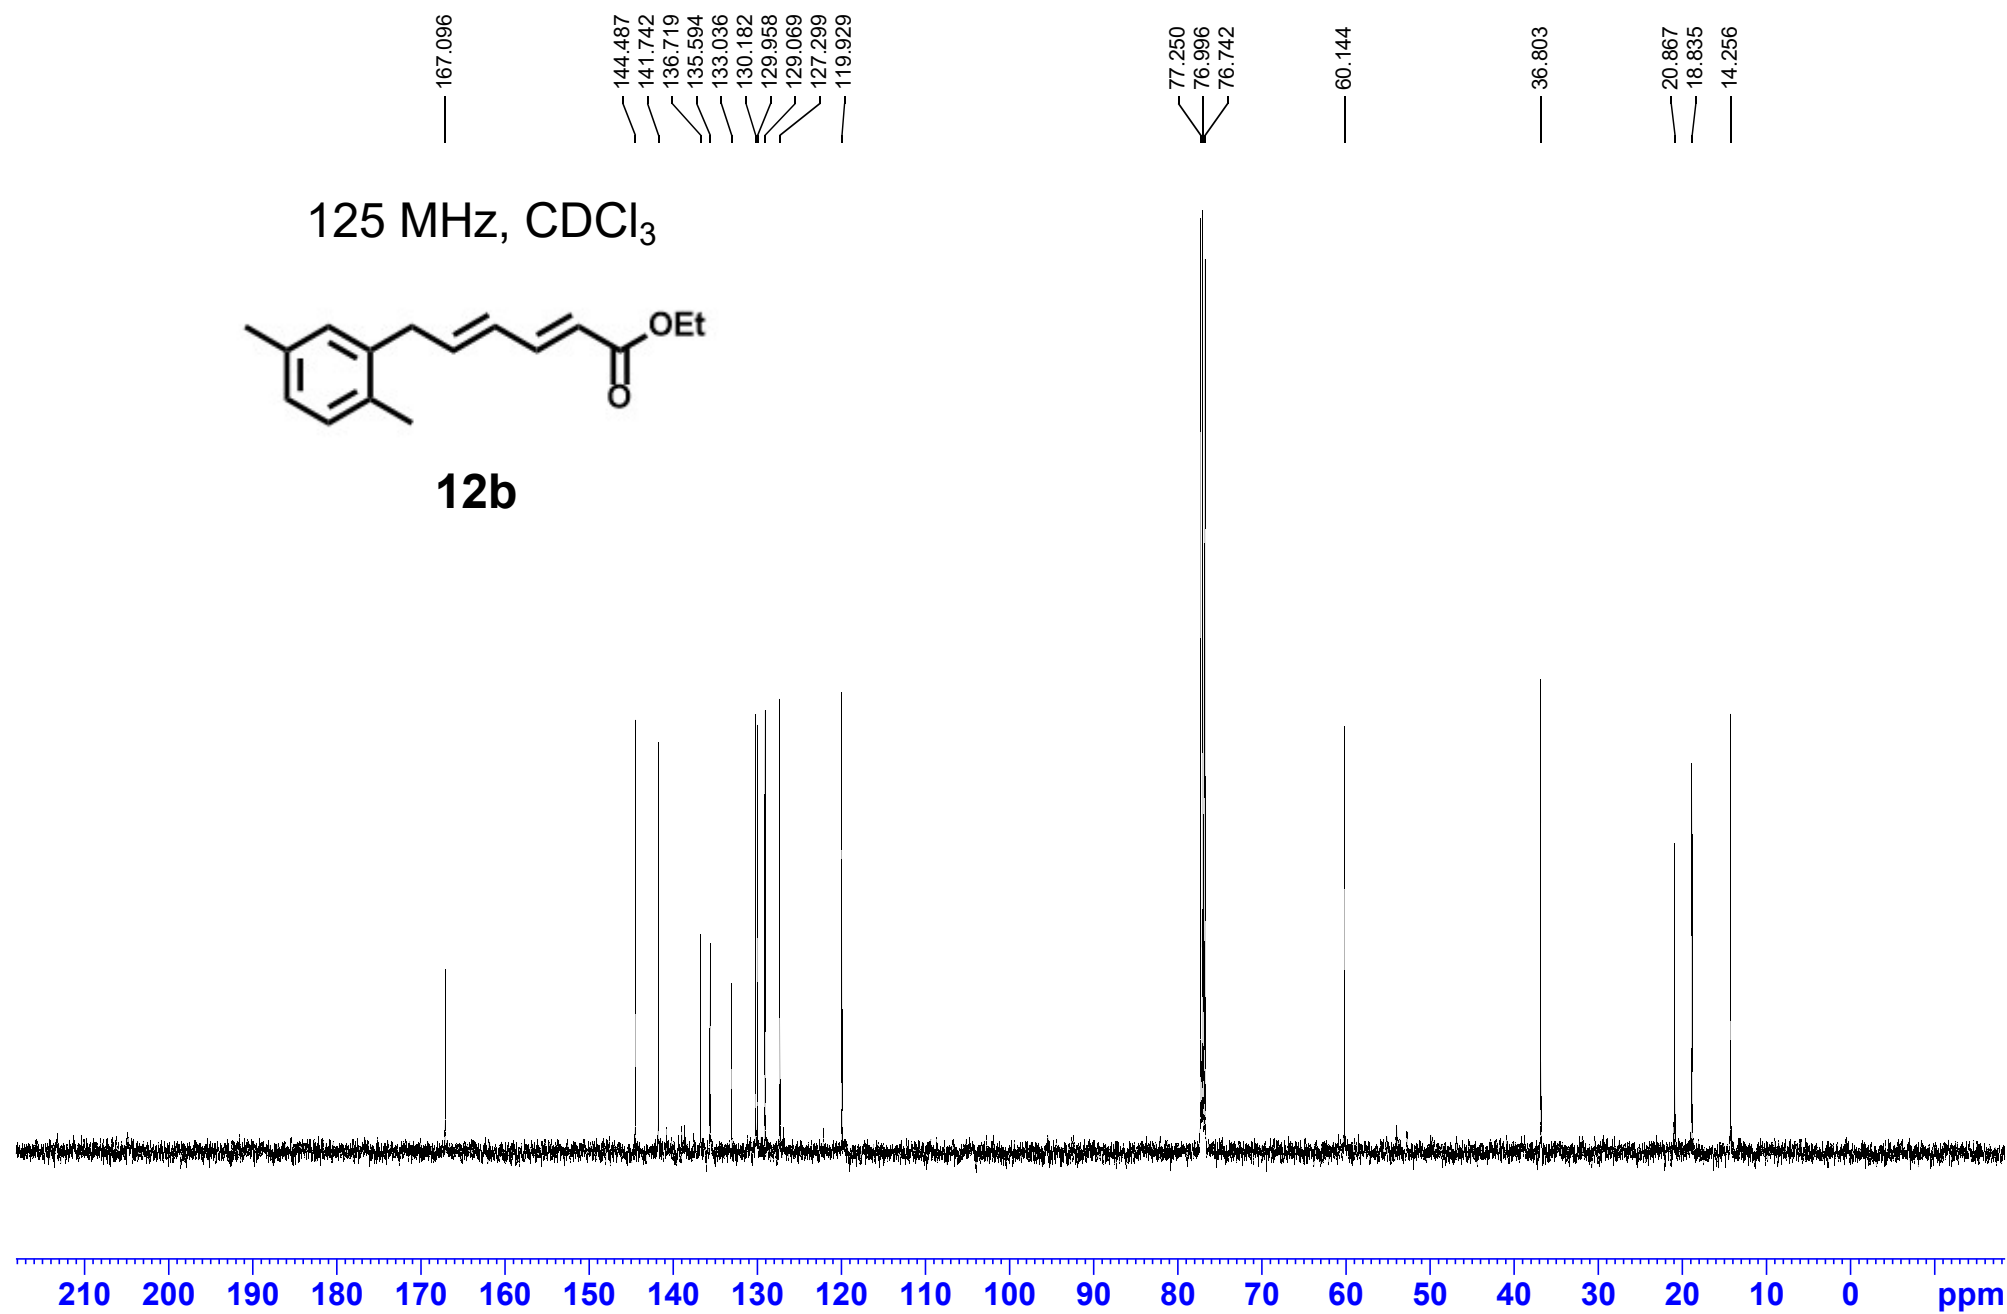

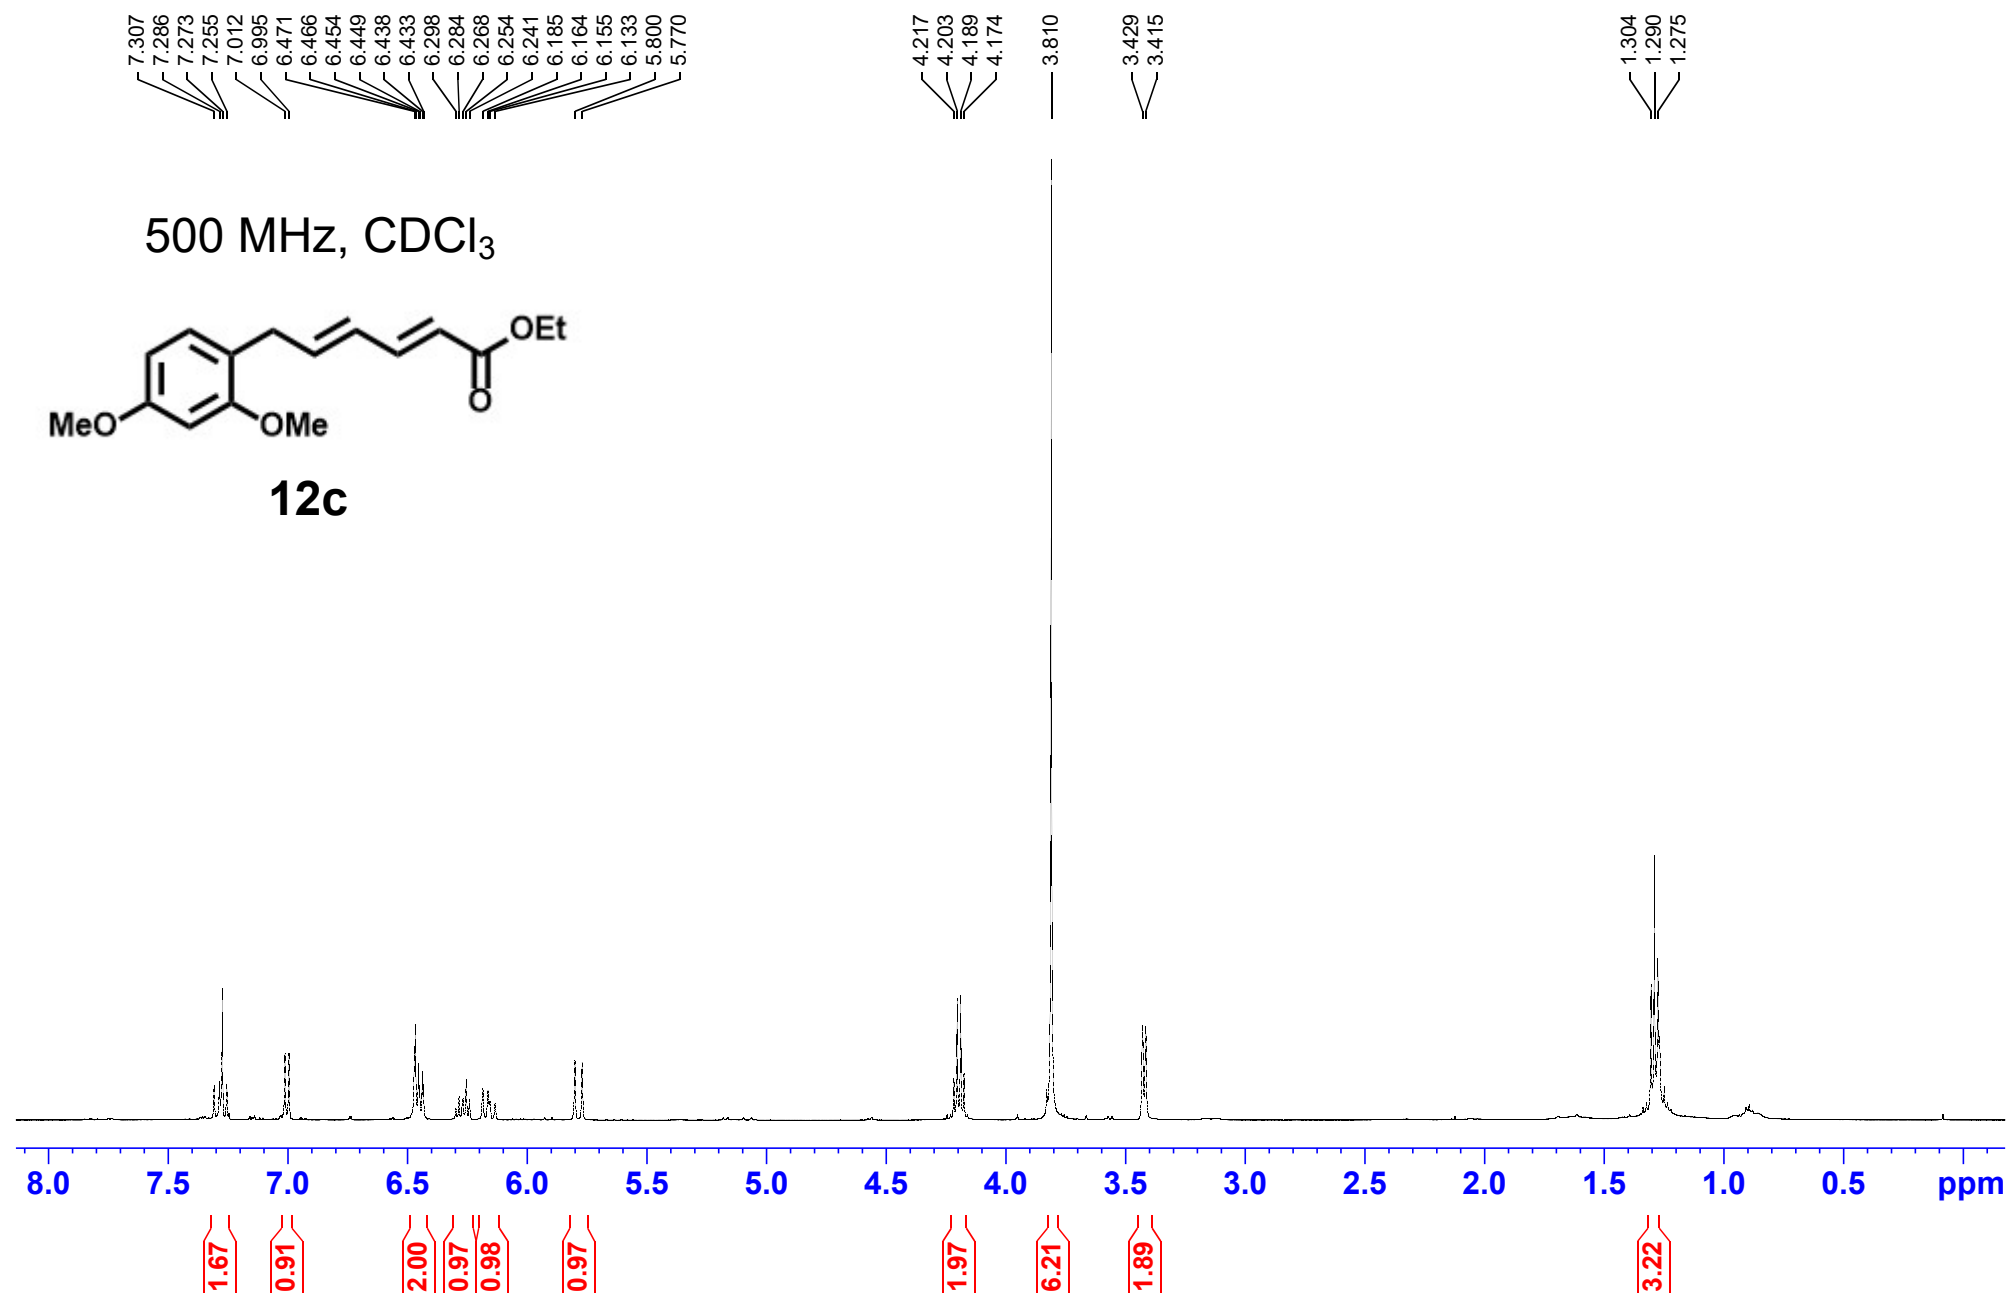

pmp.057 21, <sup>13</sup>C, sorbate + 1,3-MeO<sub>2</sub>Ph, 500/125, 1/17/22

125 MHz, CDCl<sub>3</sub>

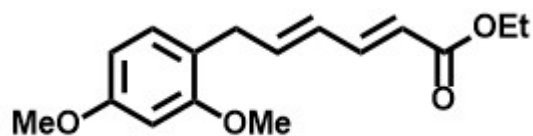

**12c**

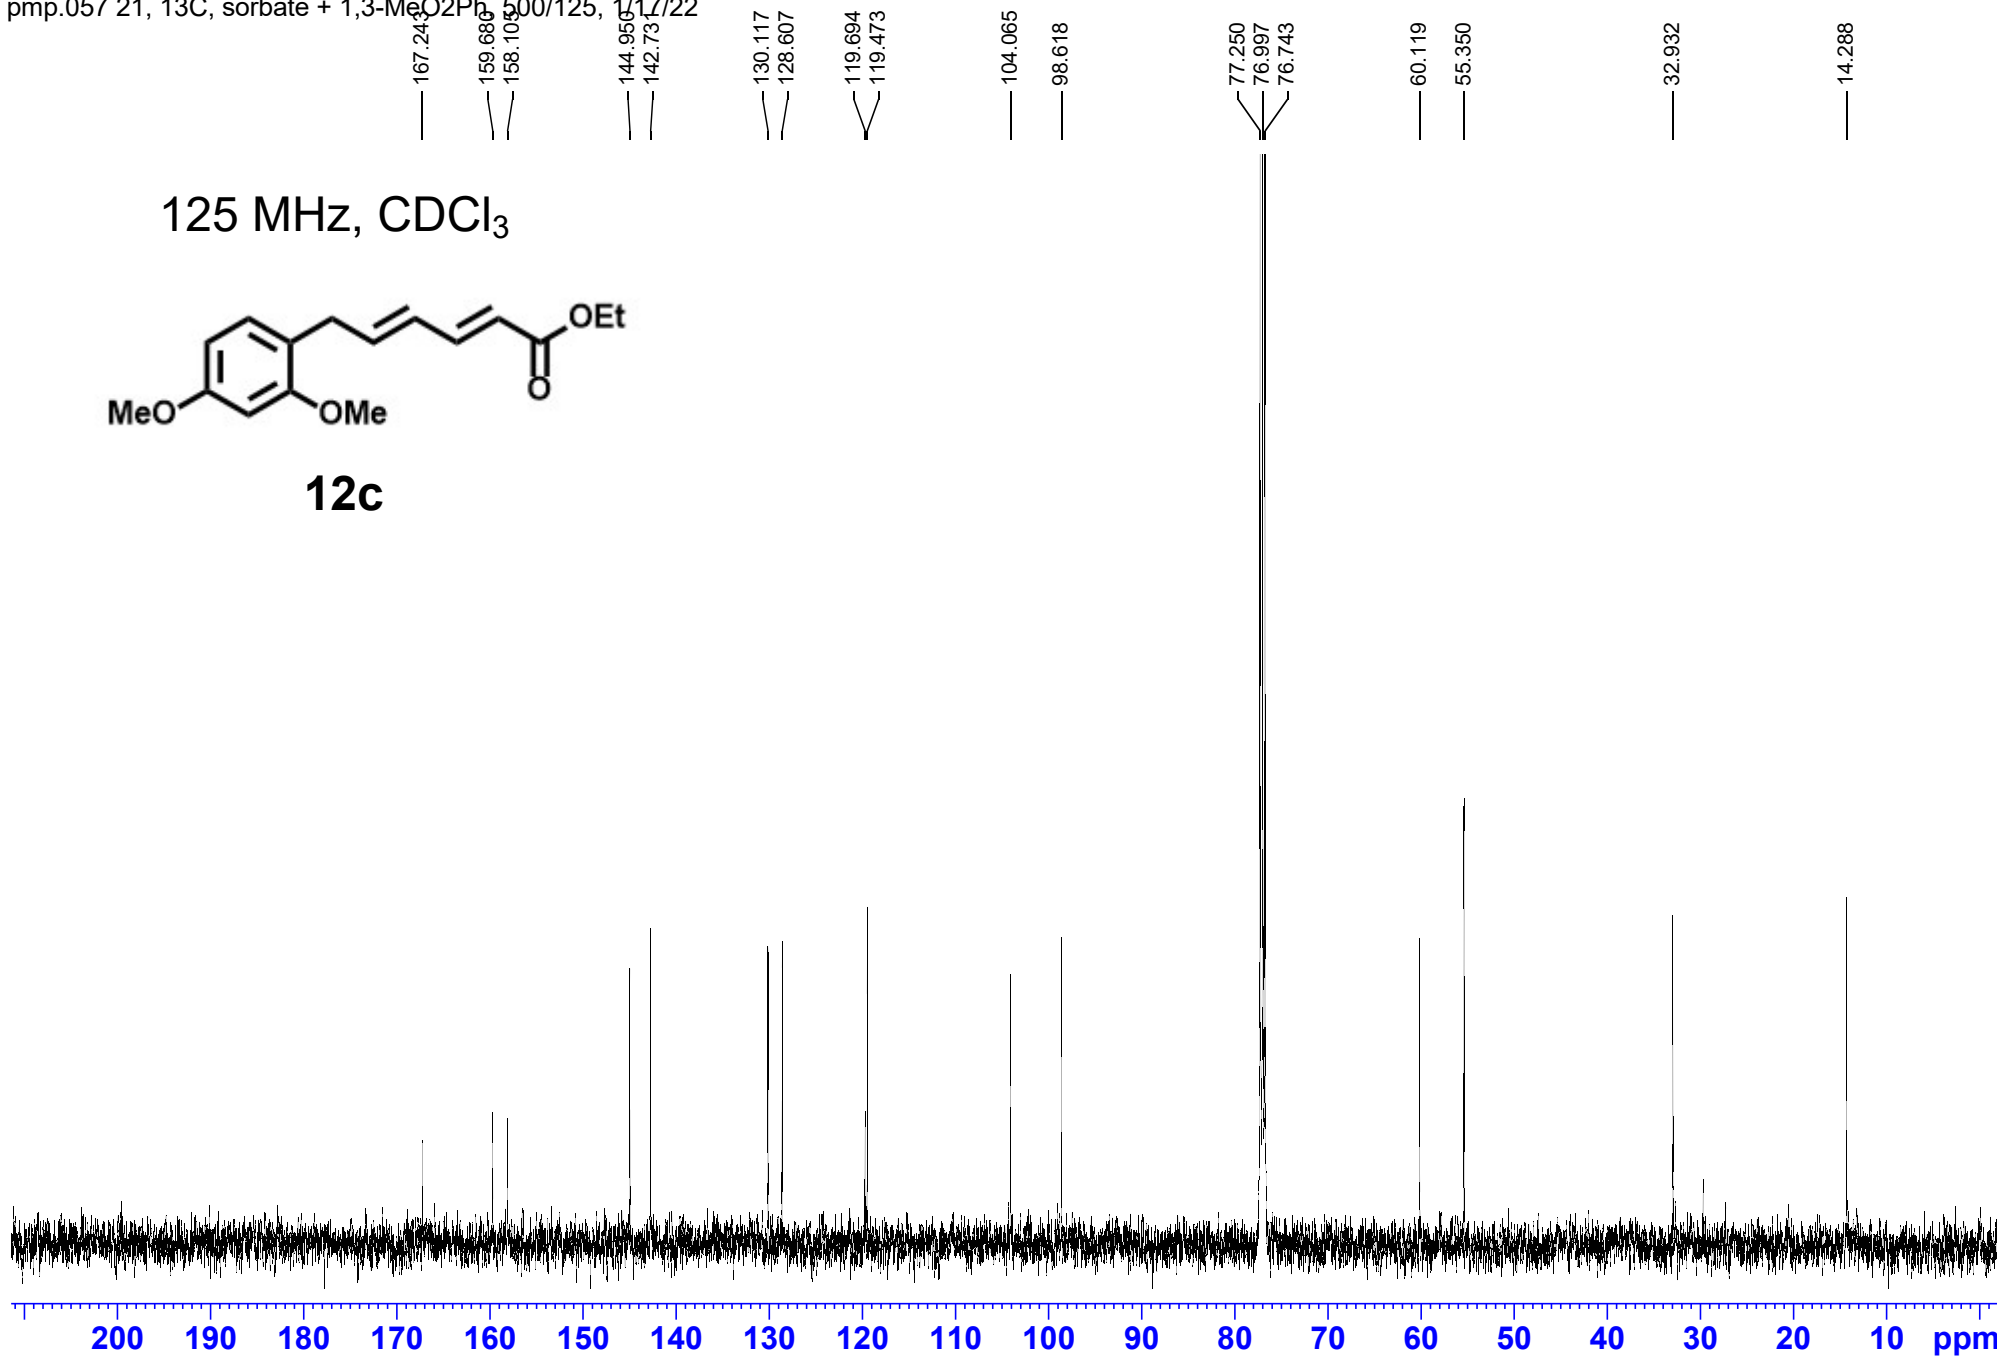

pmp.069 20, 1H, sorbate + 135-MeO3Ph, 1H, 500, 1/15/22

7.274  
7.270  
7.252  
7.244  
7.222

6.249  
6.237  
6.224  
6.219  
6.206  
6.194  
6.146  
6.132  
6.110  
6.102  
6.098  
6.080  
5.751  
5.720

4.196  
4.182  
4.168  
4.153  
3.817  
3.796  
3.439  
3.426

1.286  
1.272  
1.257

500 MHz, CDCl<sub>3</sub>

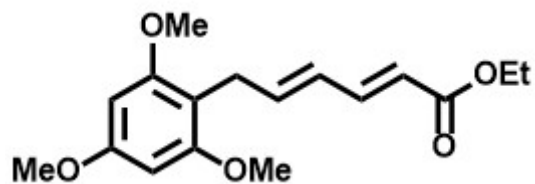

**12d**

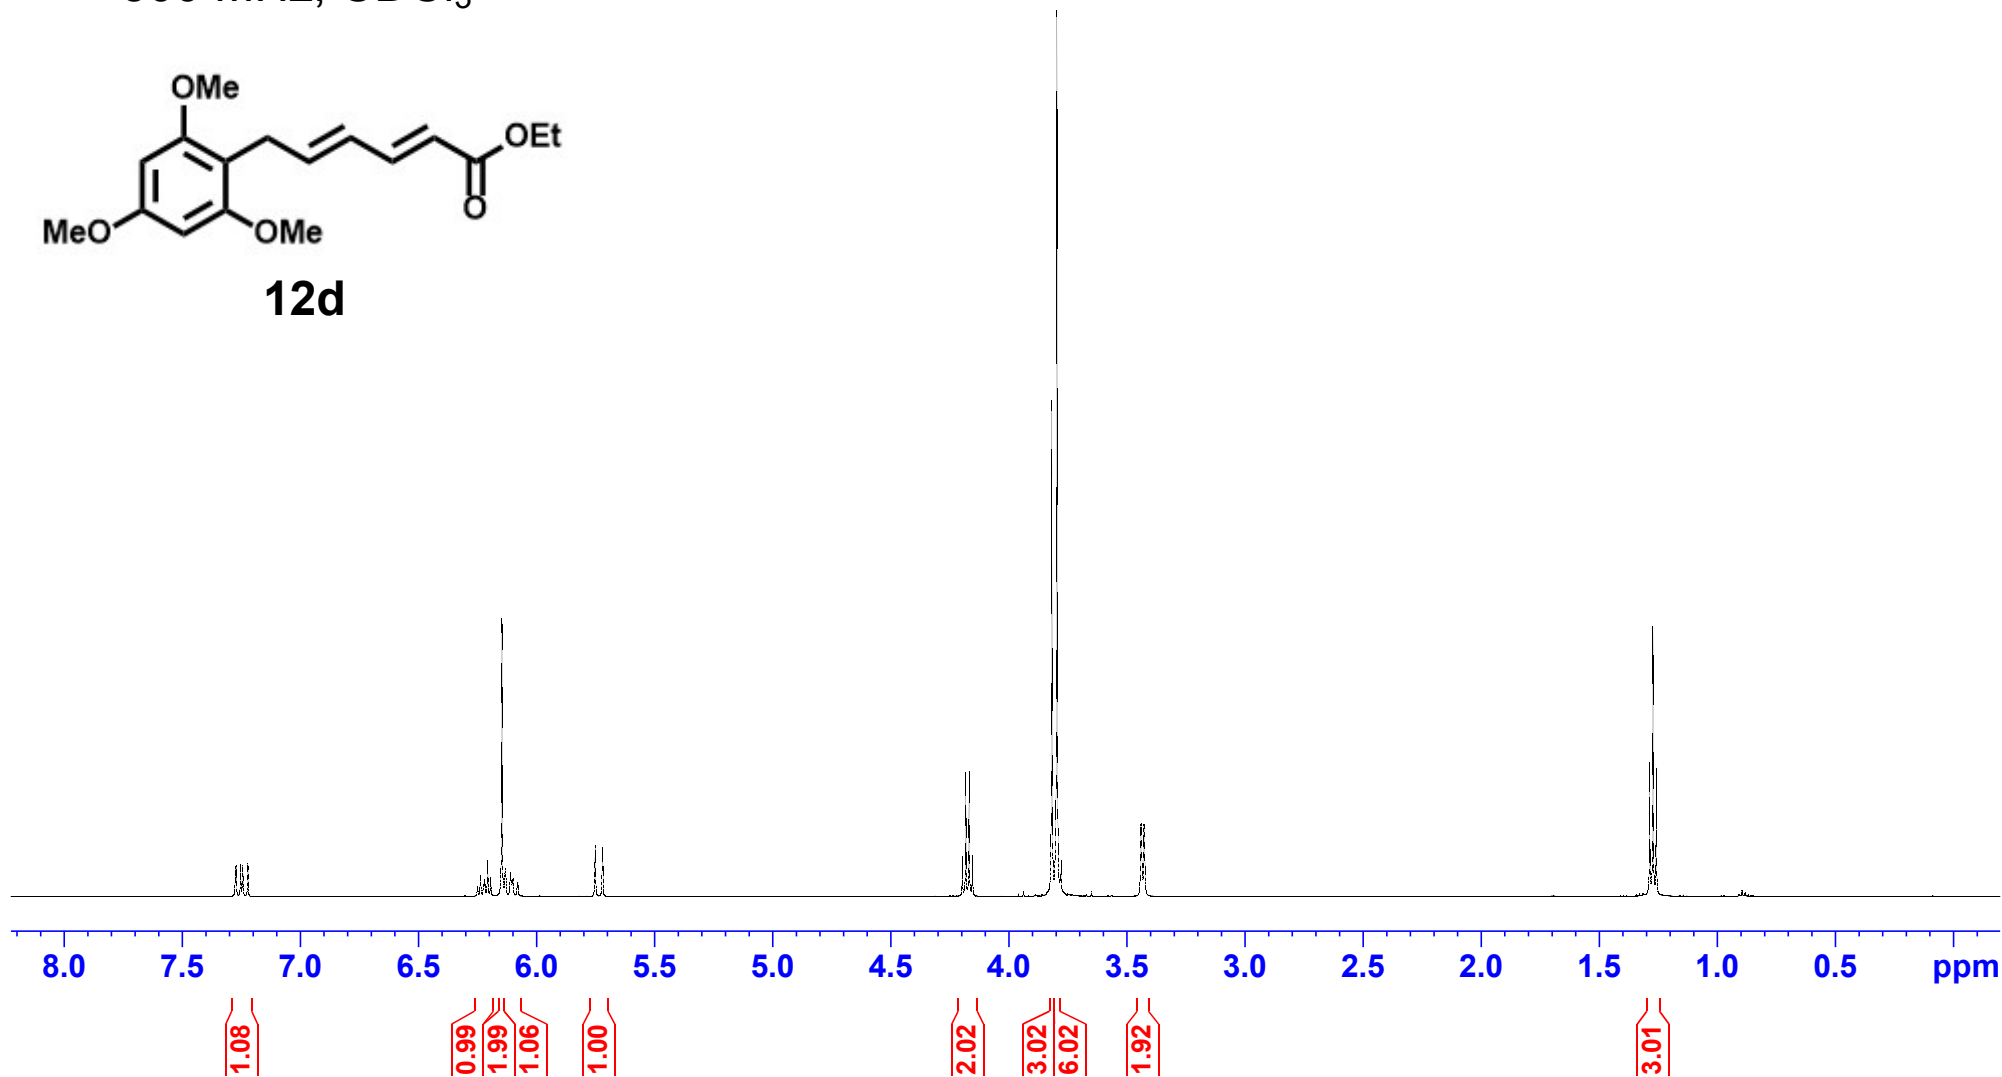

pmp.069 21, <sup>13</sup>C, sorbate + 135-MeO<sub>3</sub>Ph, 500/125, 1/15/22

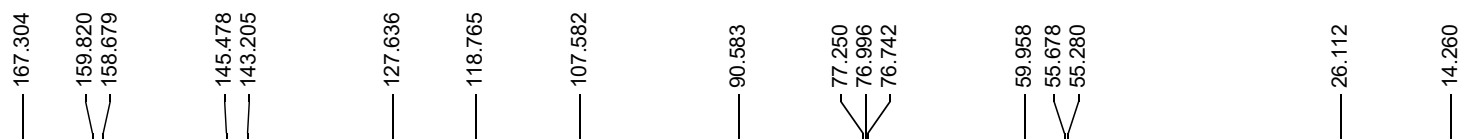

125 MHz, CDCl<sub>3</sub>

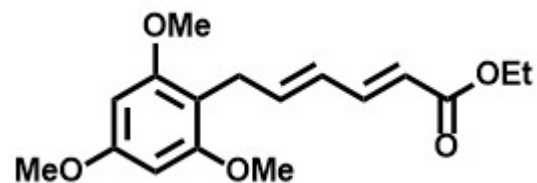

**12d**

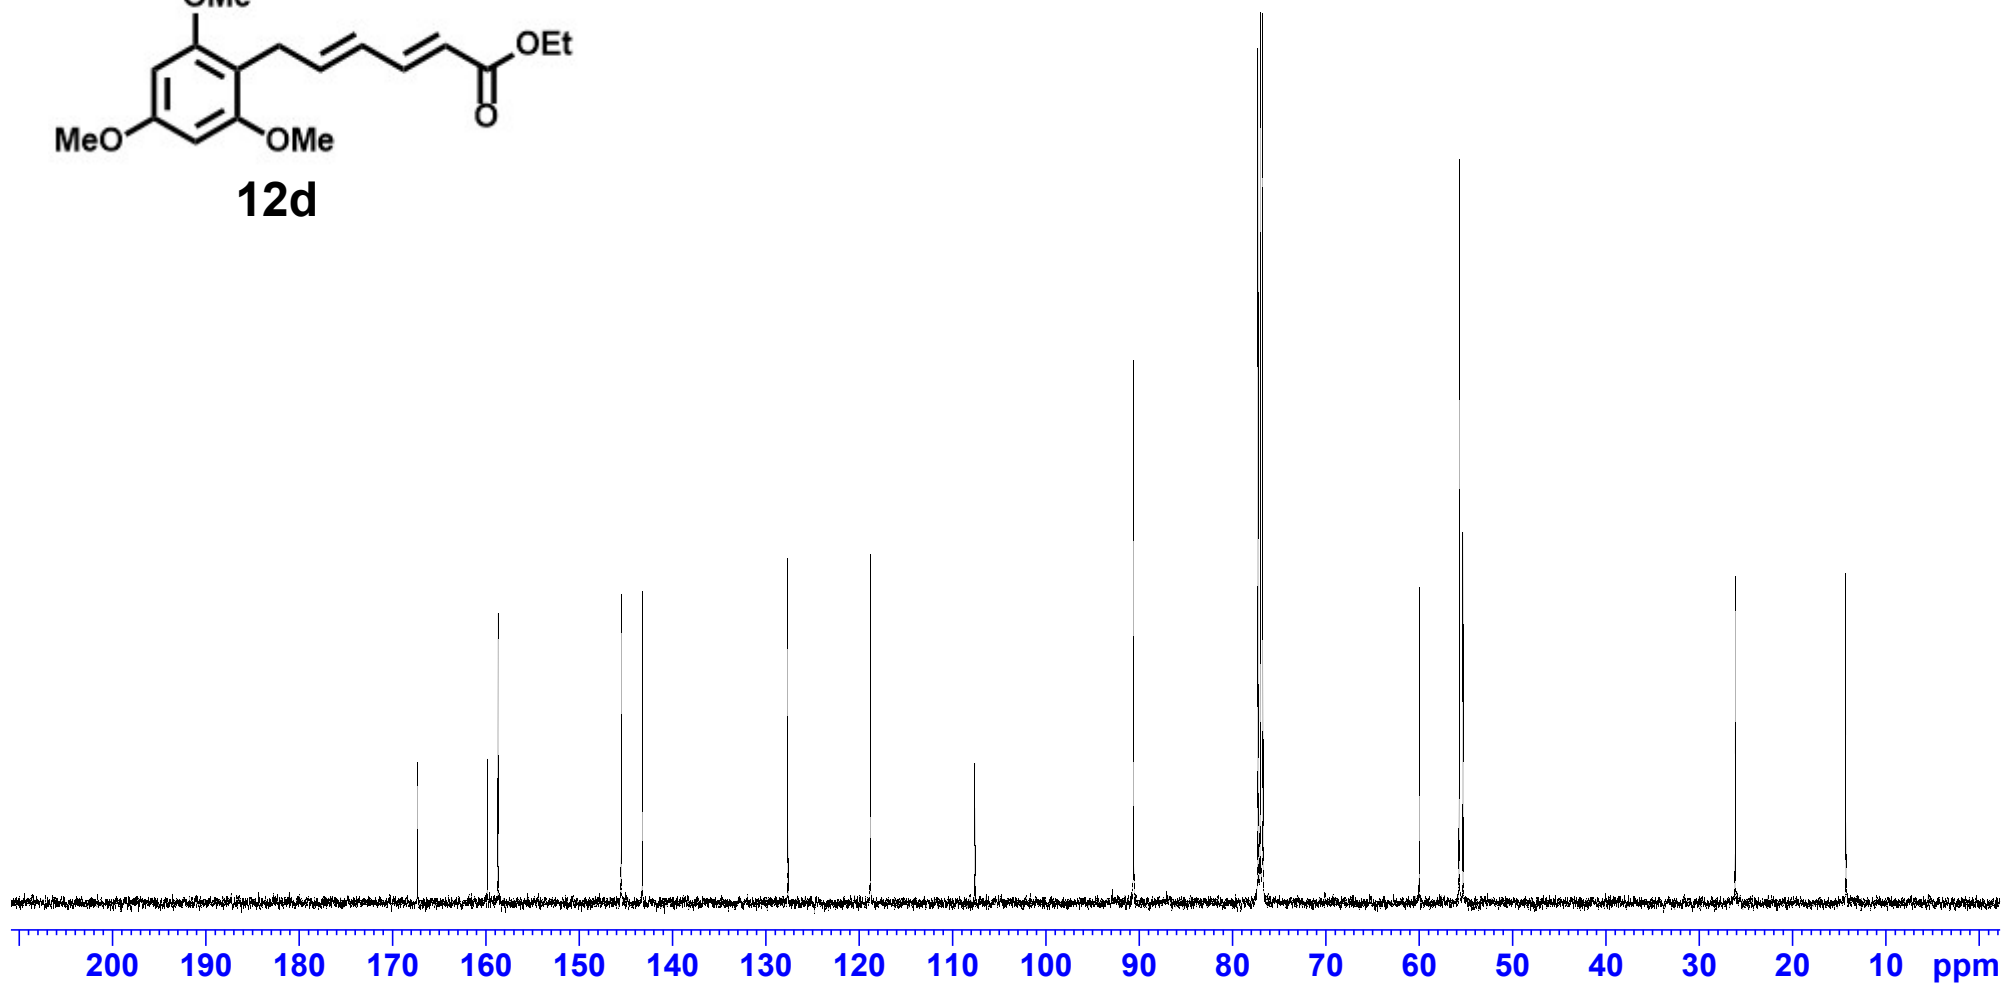

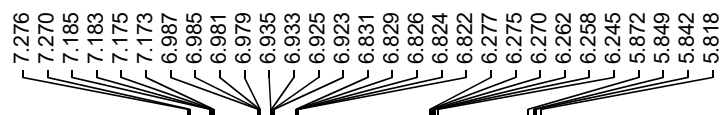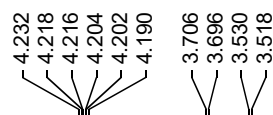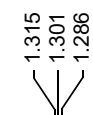

500 MHz, CDCl<sub>3</sub>

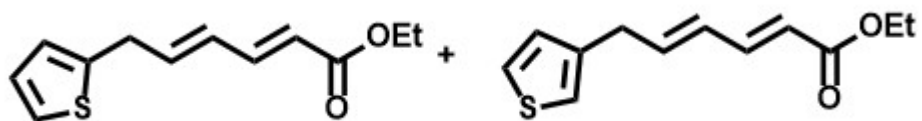

12e

12e'

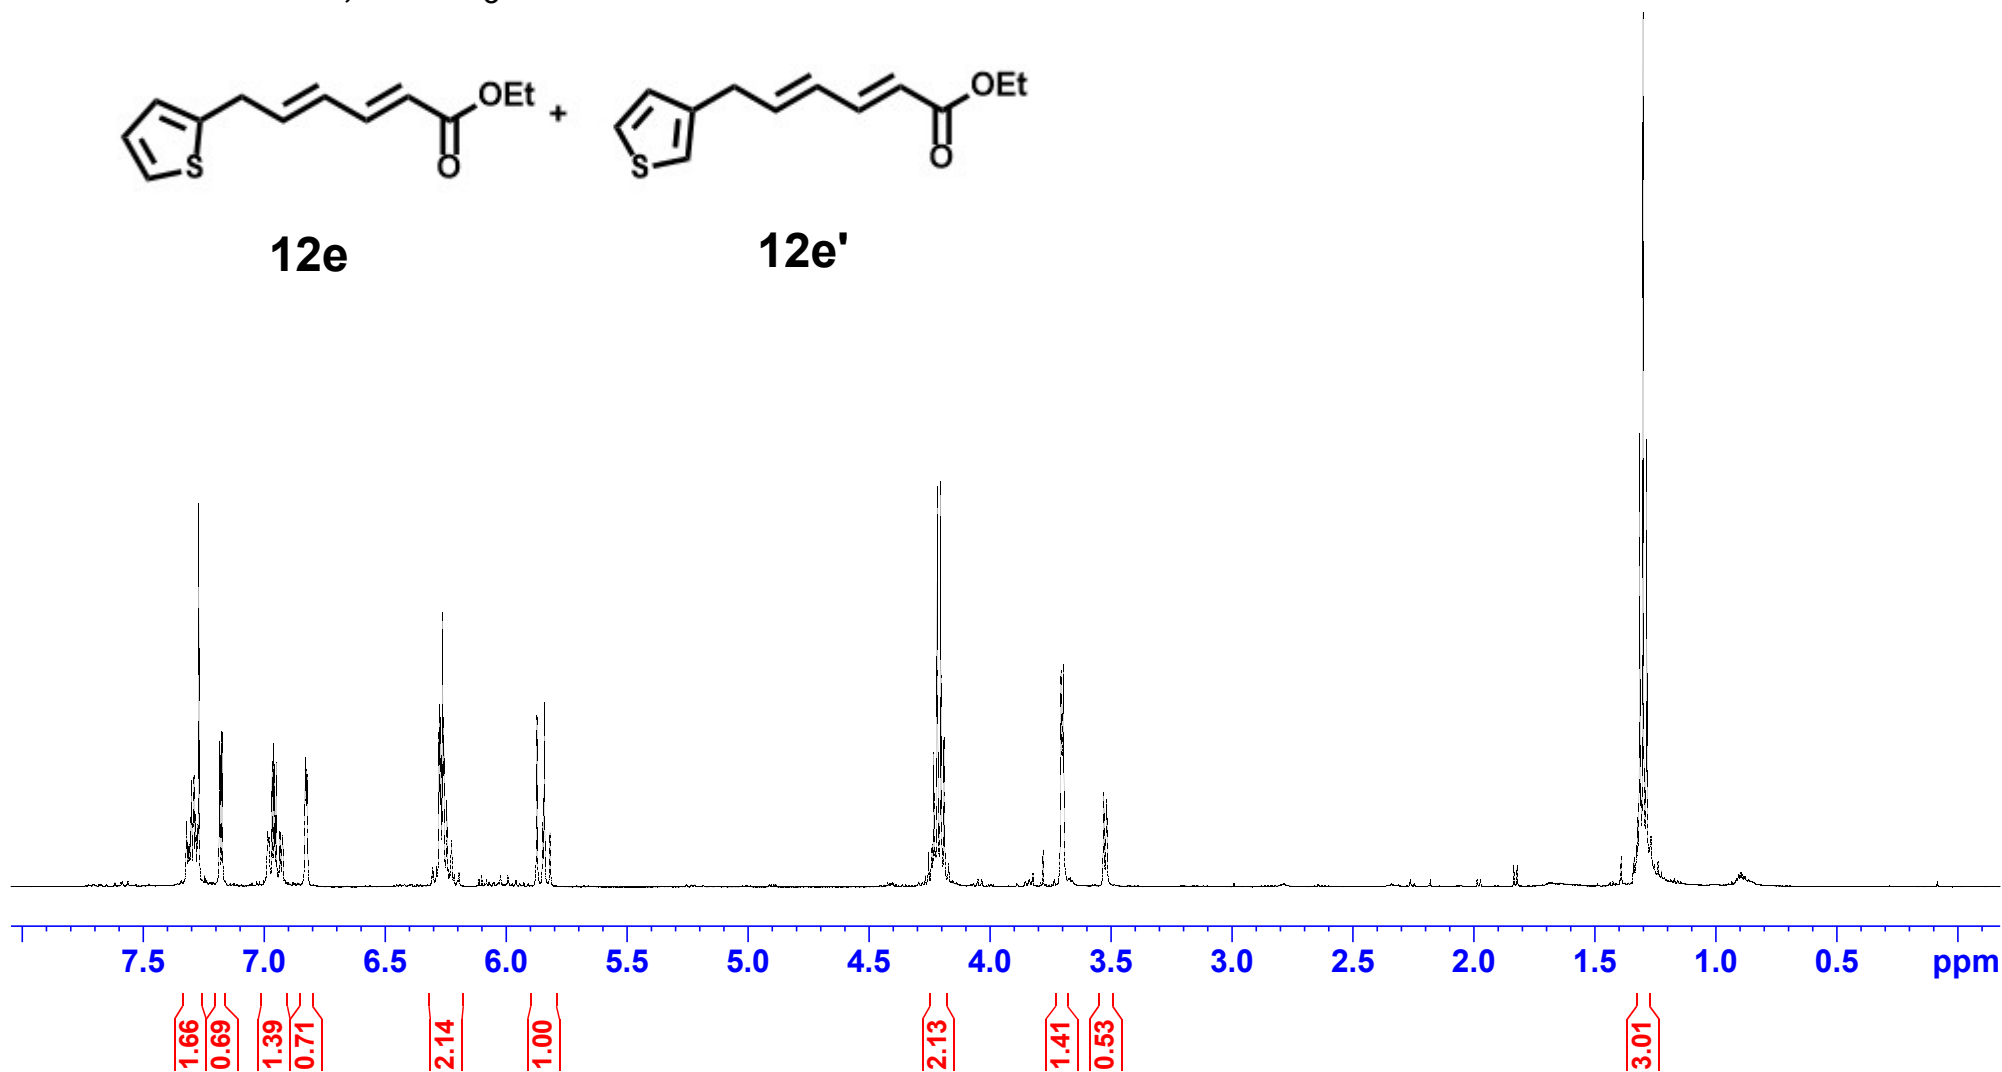

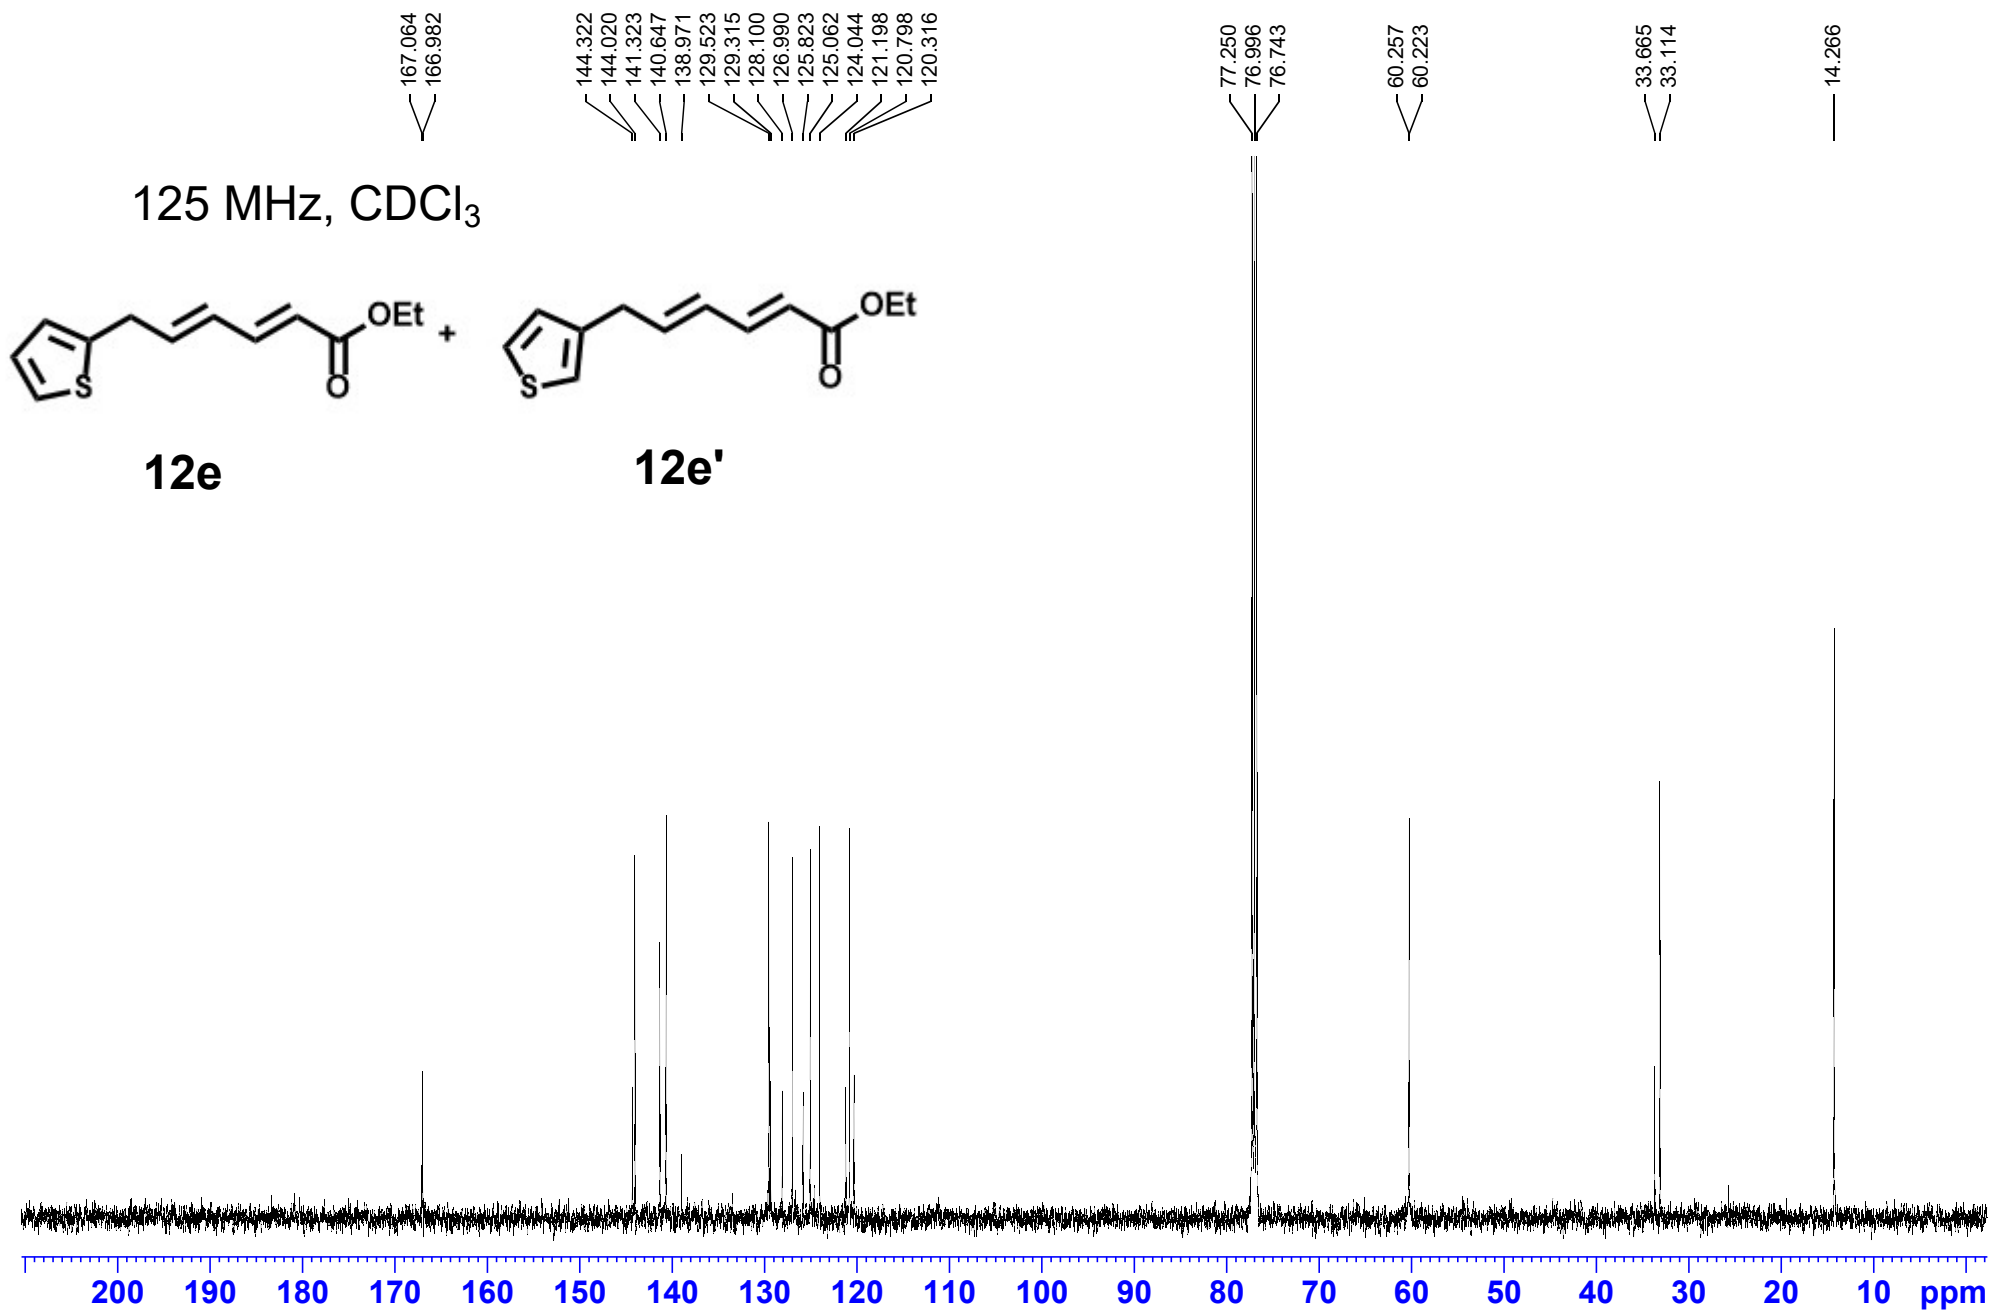

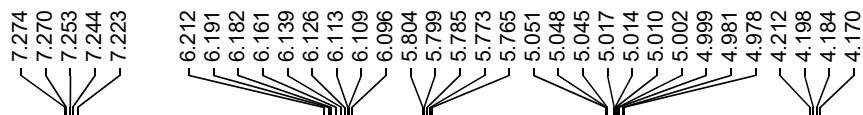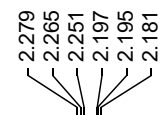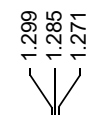

500 MHz, CDCl<sub>3</sub>

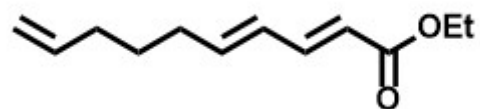

**12f**

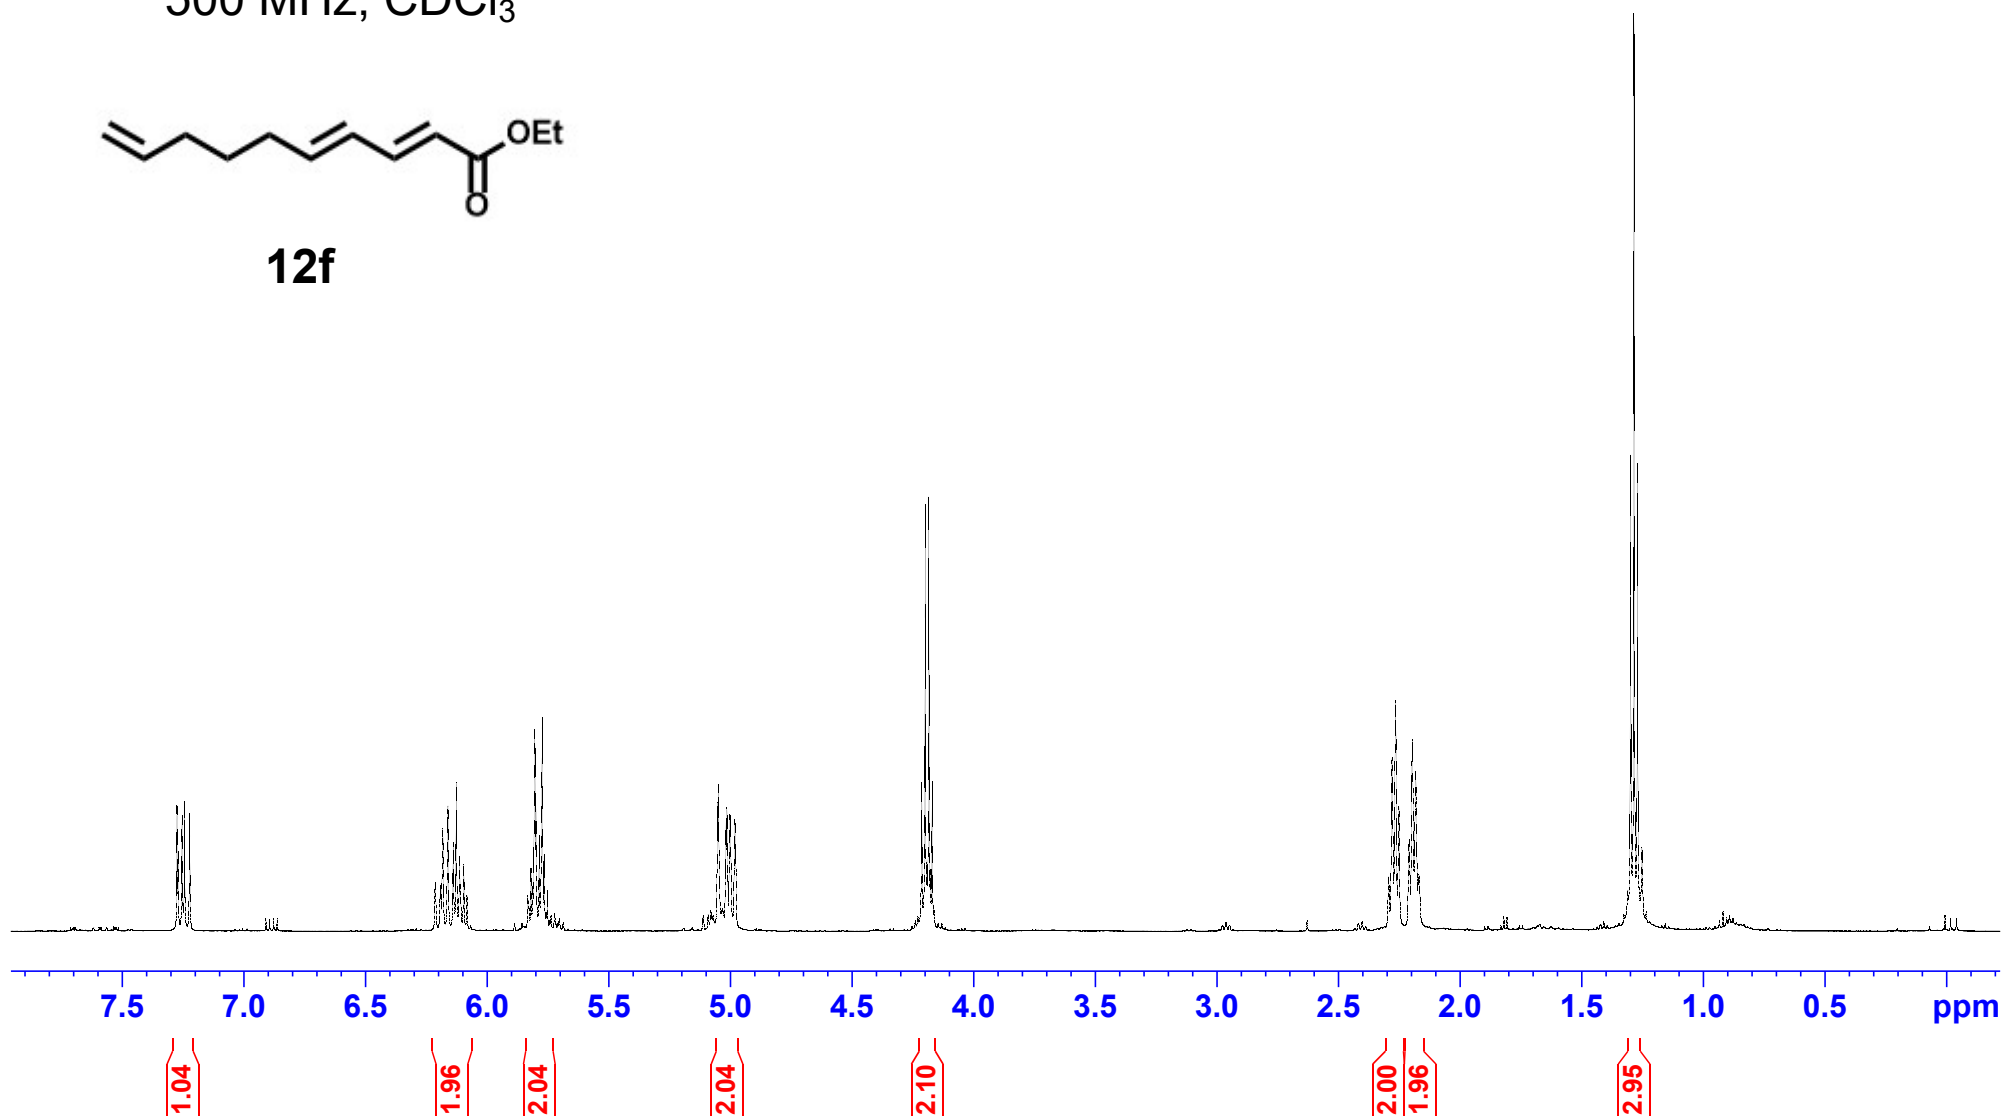

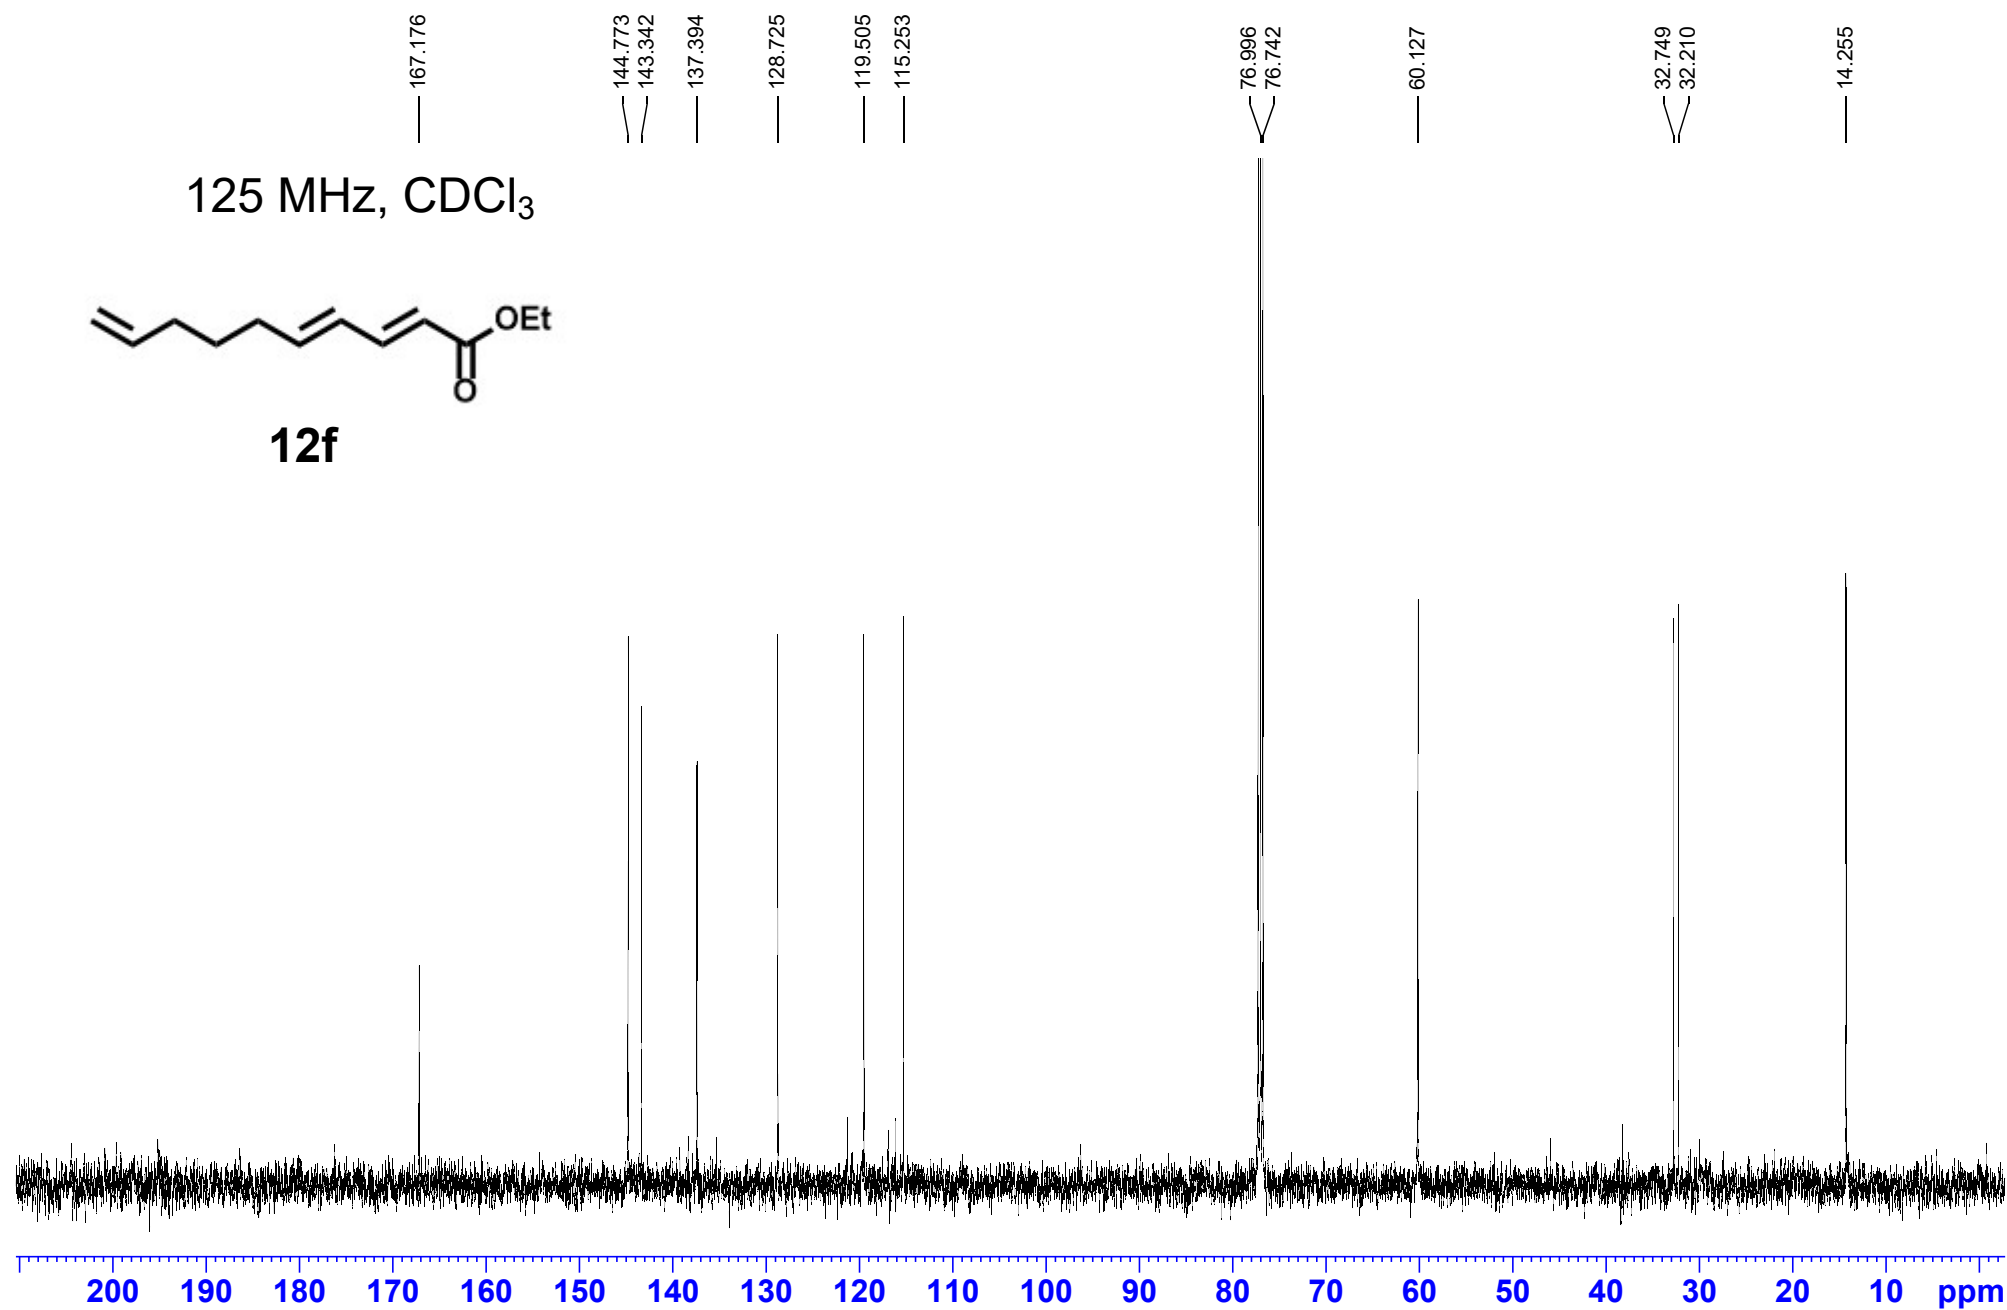

pmp.100 20, 1H, Ph ket + mesitylene, 300US, 2/4/22

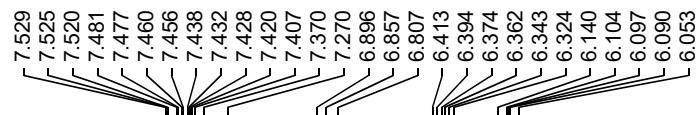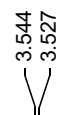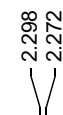

300 MHz, CDCl<sub>3</sub>

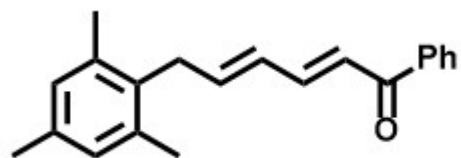

**12g**

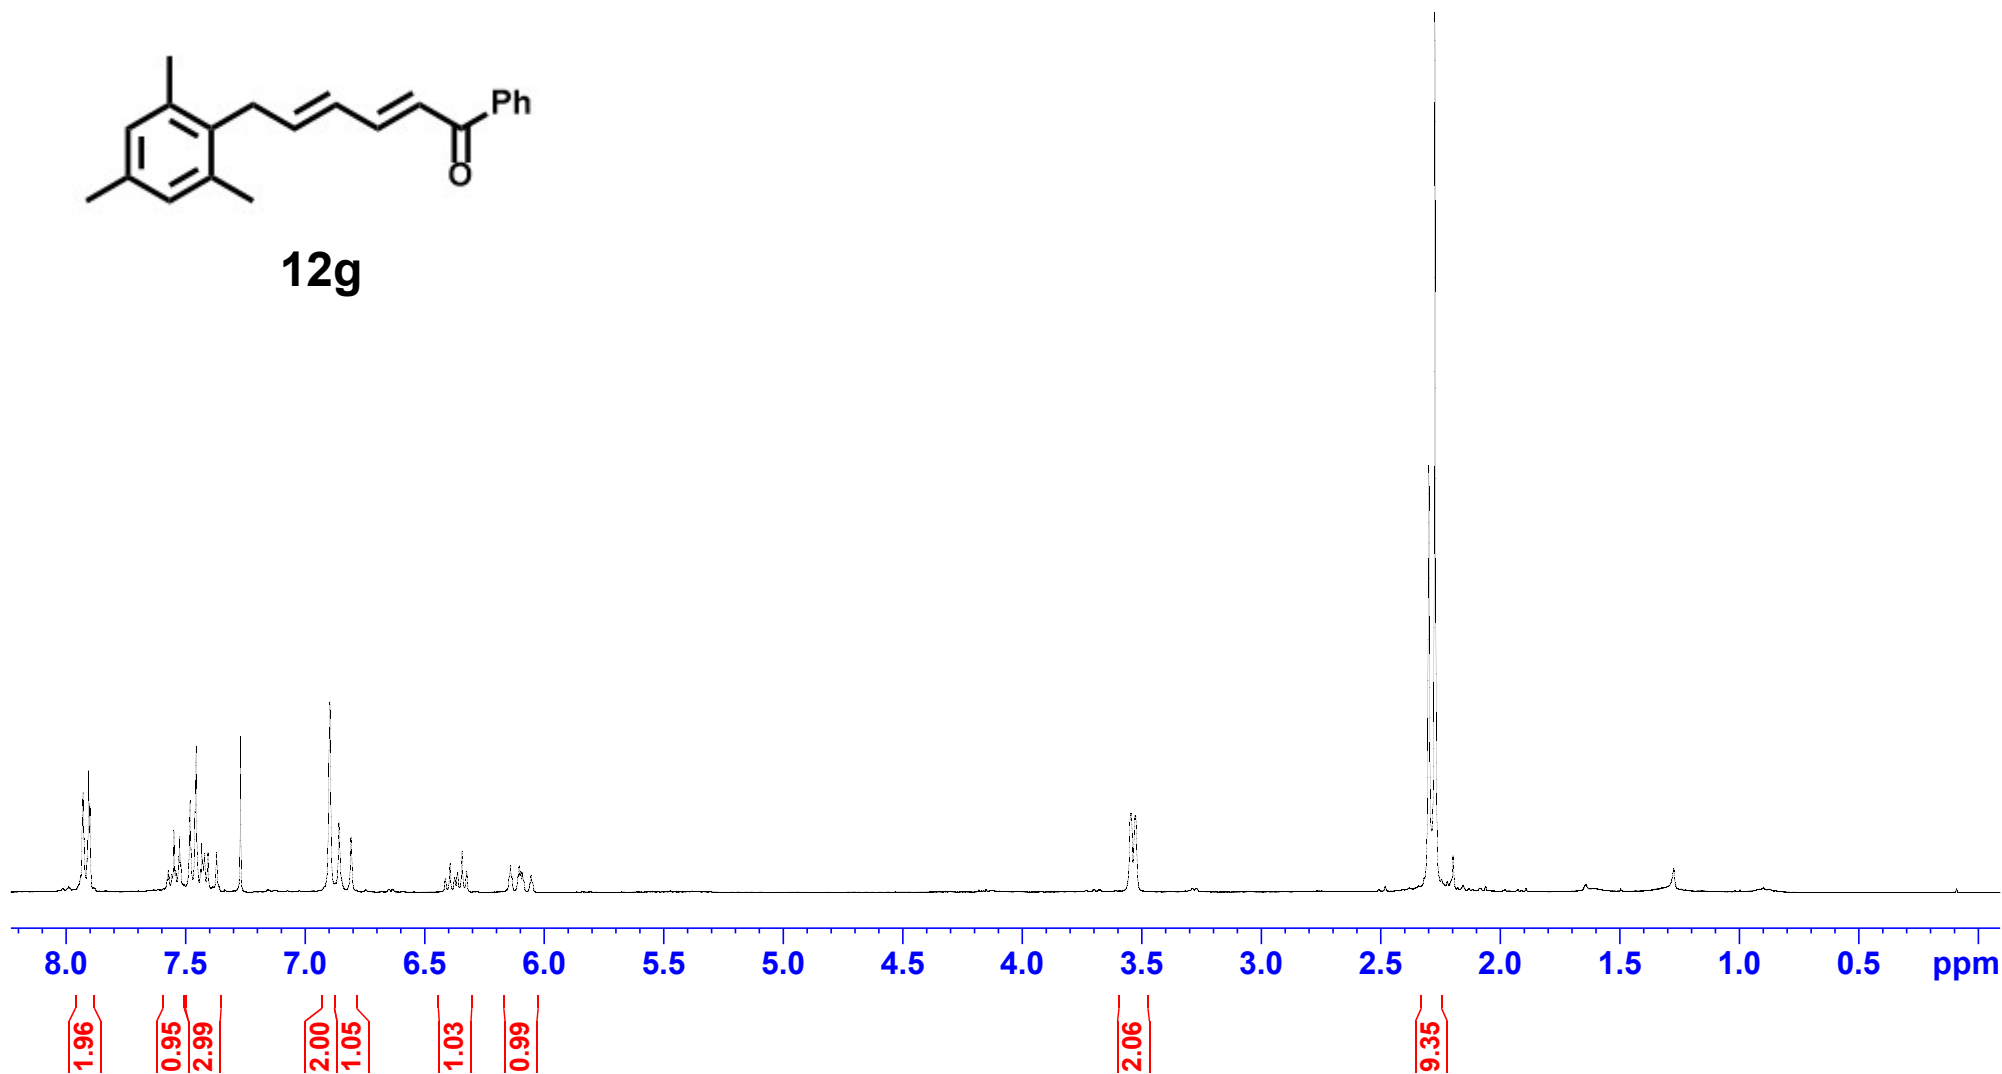

pmp.100 21, <sup>13</sup>C, Ph ketone + mesitylene, 300US/75, 2/4/21

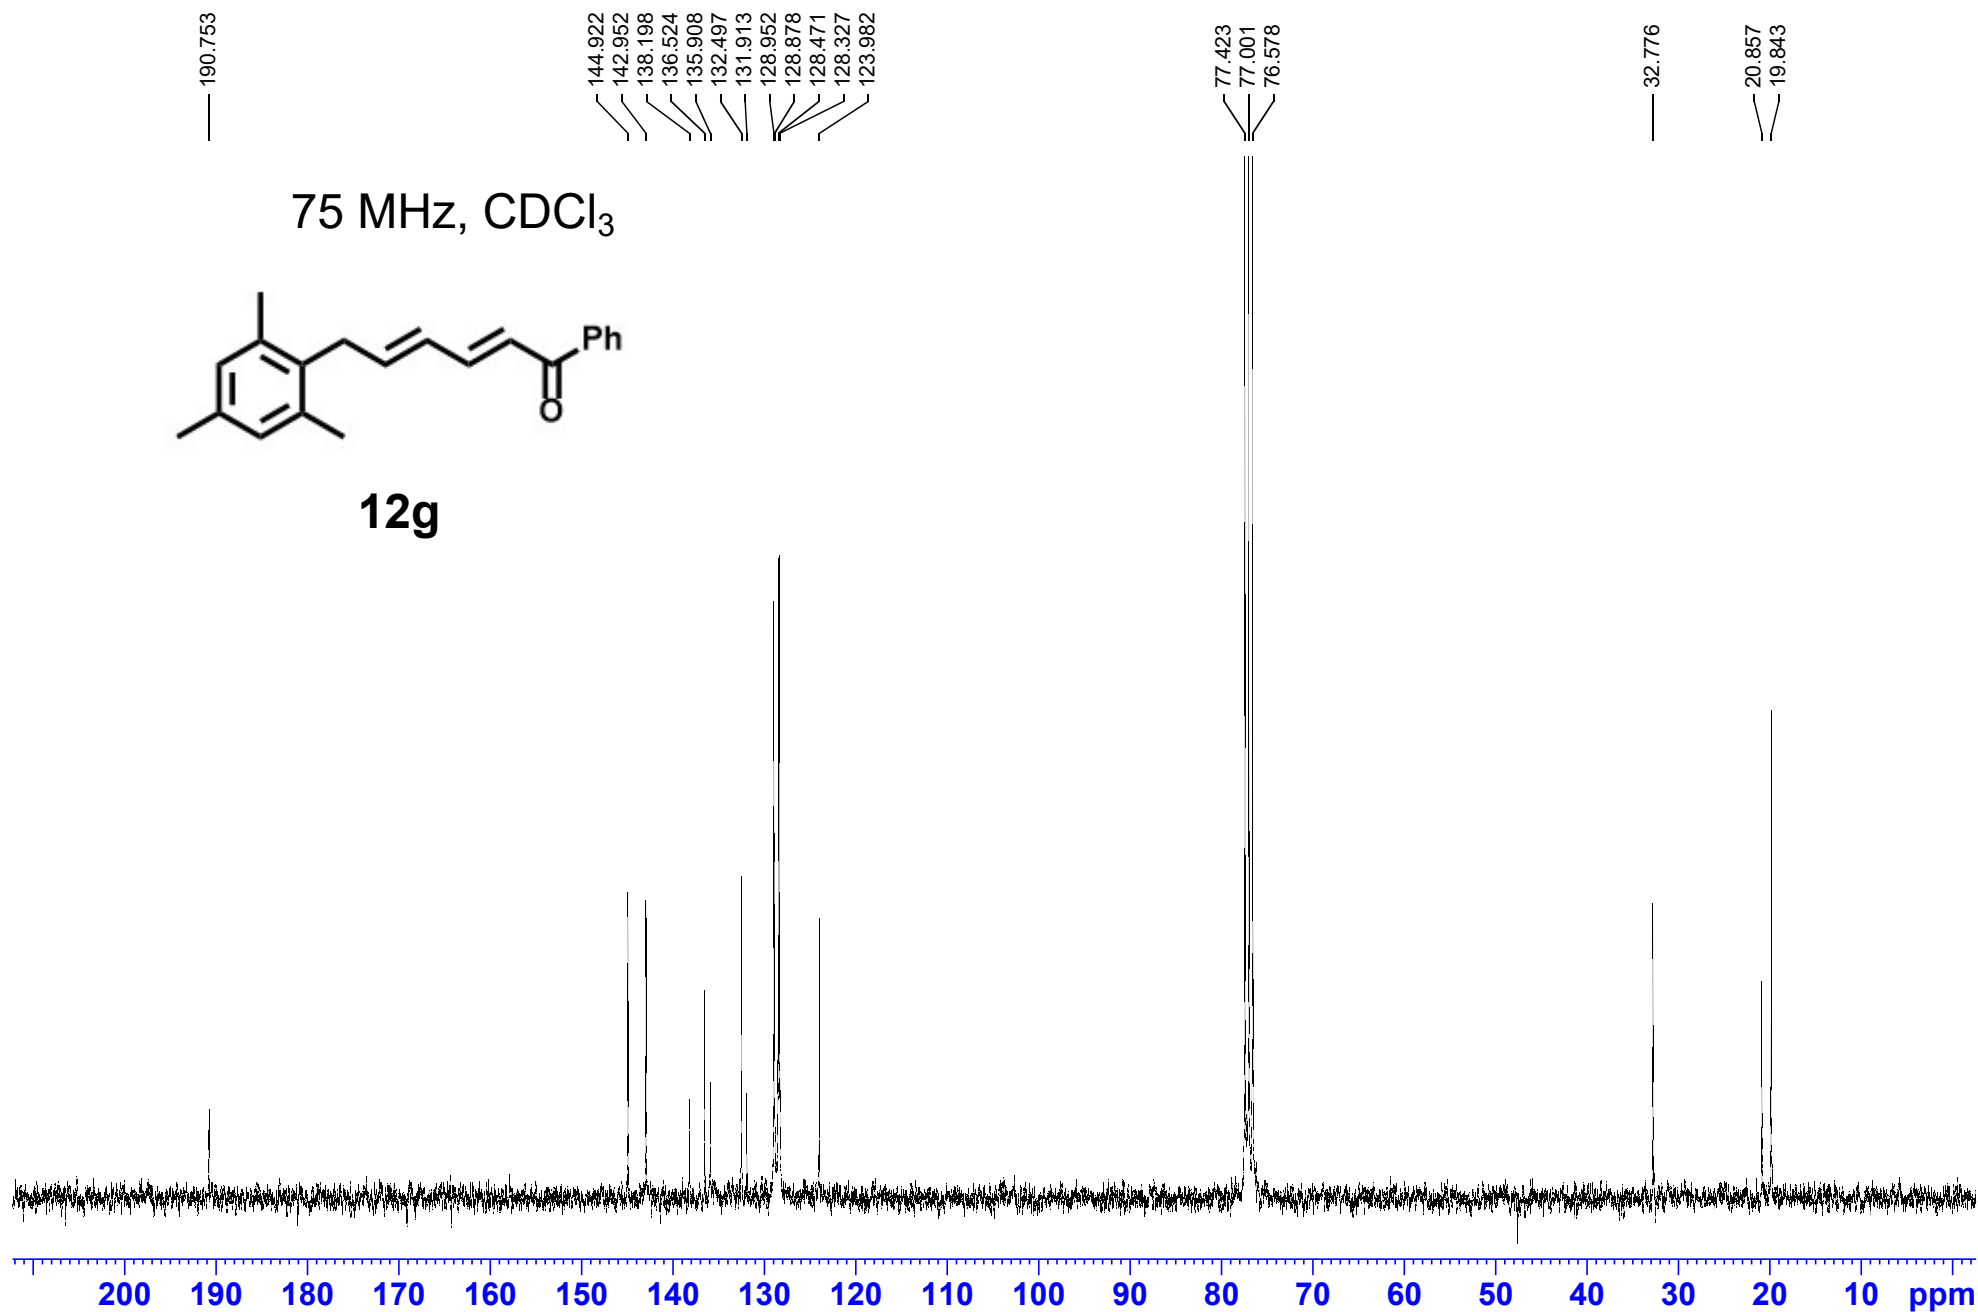

pmp.148 20, phenyl fused + mesitylene, 1H, 500, 1/20/22

8.252  
8.221  
7.600  
7.597  
7.583  
7.270  
7.223  
7.209  
7.195  
7.186  
7.183  
7.171  
7.169  
7.156  
7.154  
6.926  
6.609  
6.594  
6.455  
6.424

4.098  
3.856

2.324  
2.146

500 MHz, CDCl<sub>3</sub>

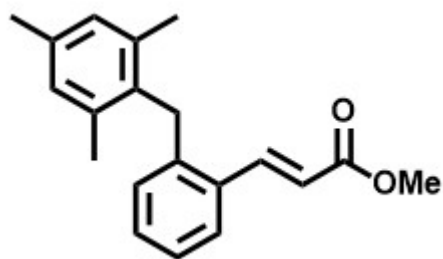

**13a**

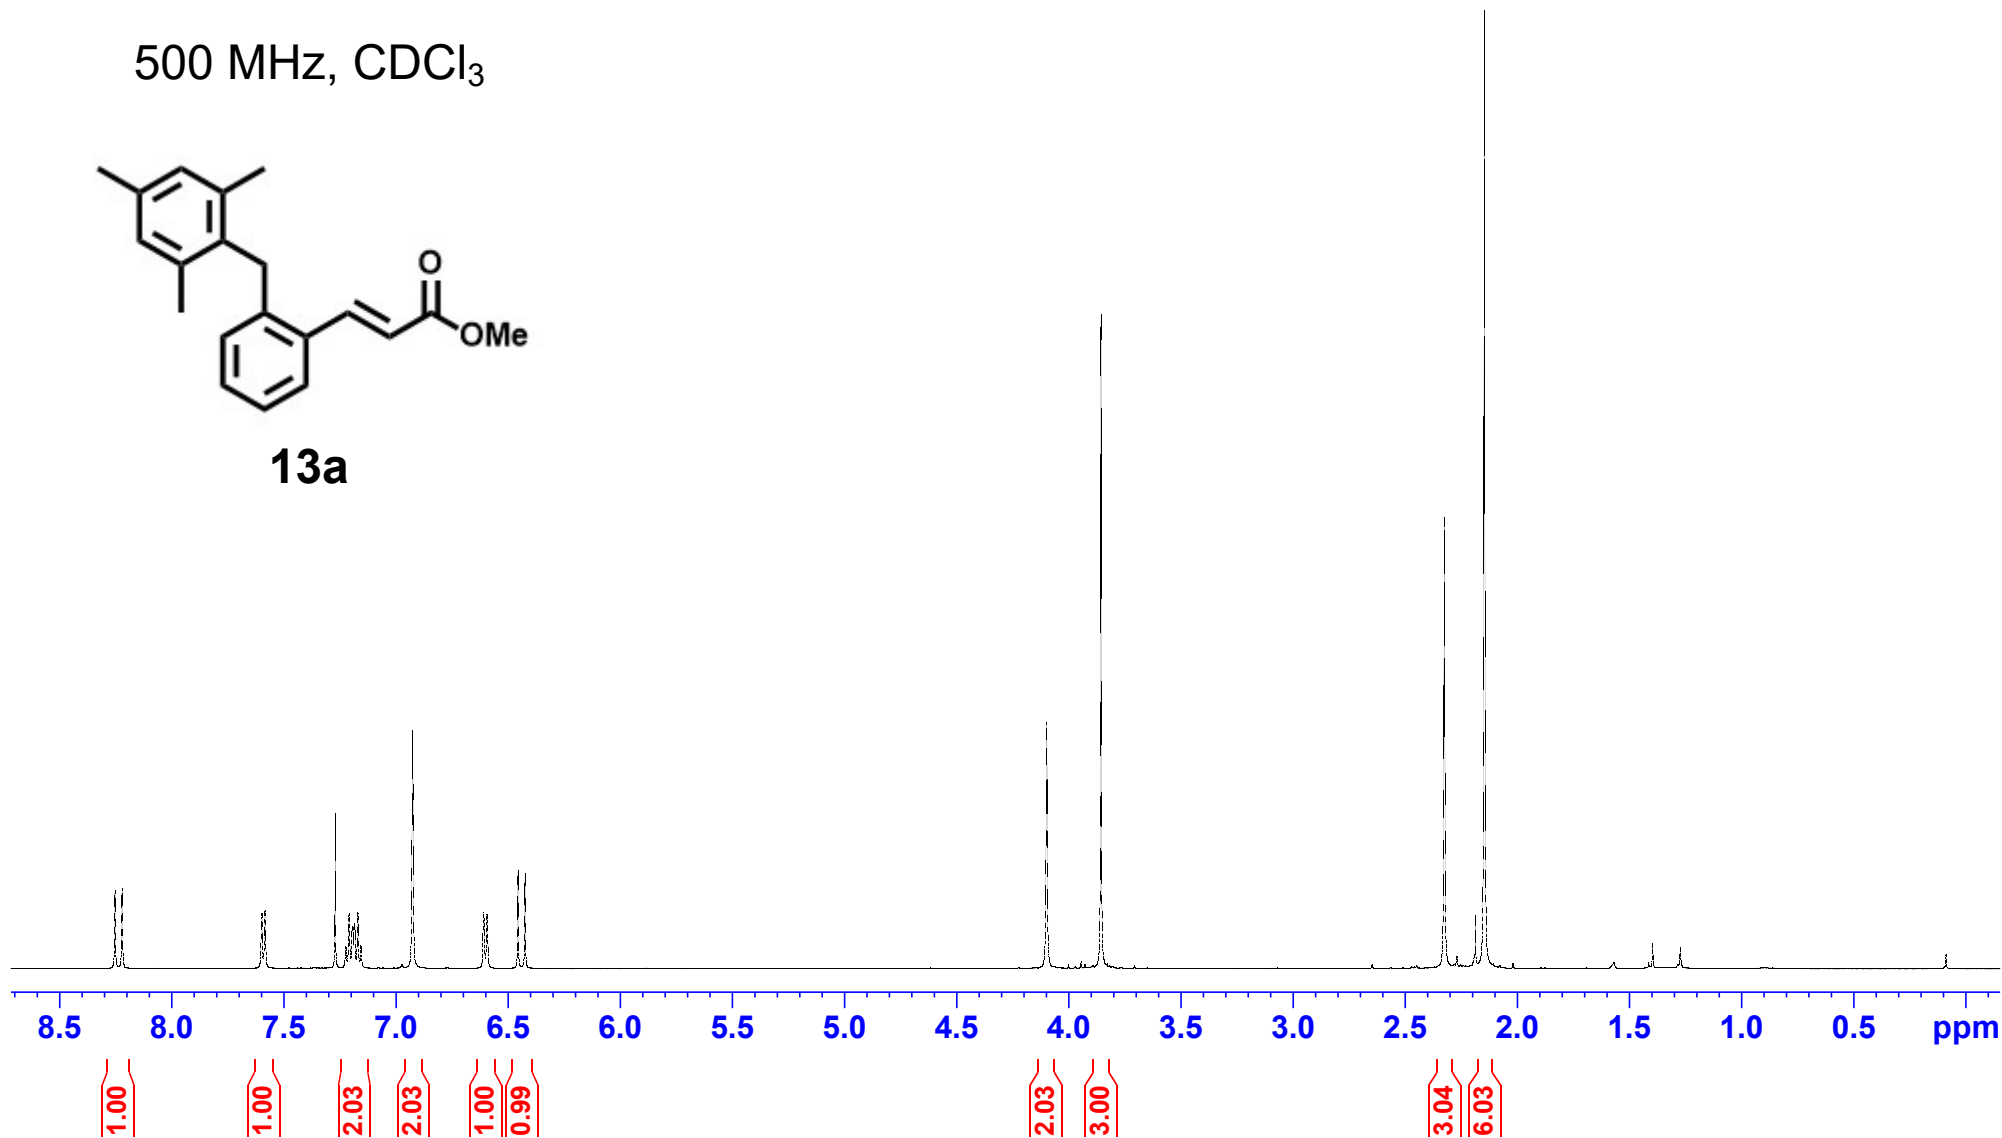

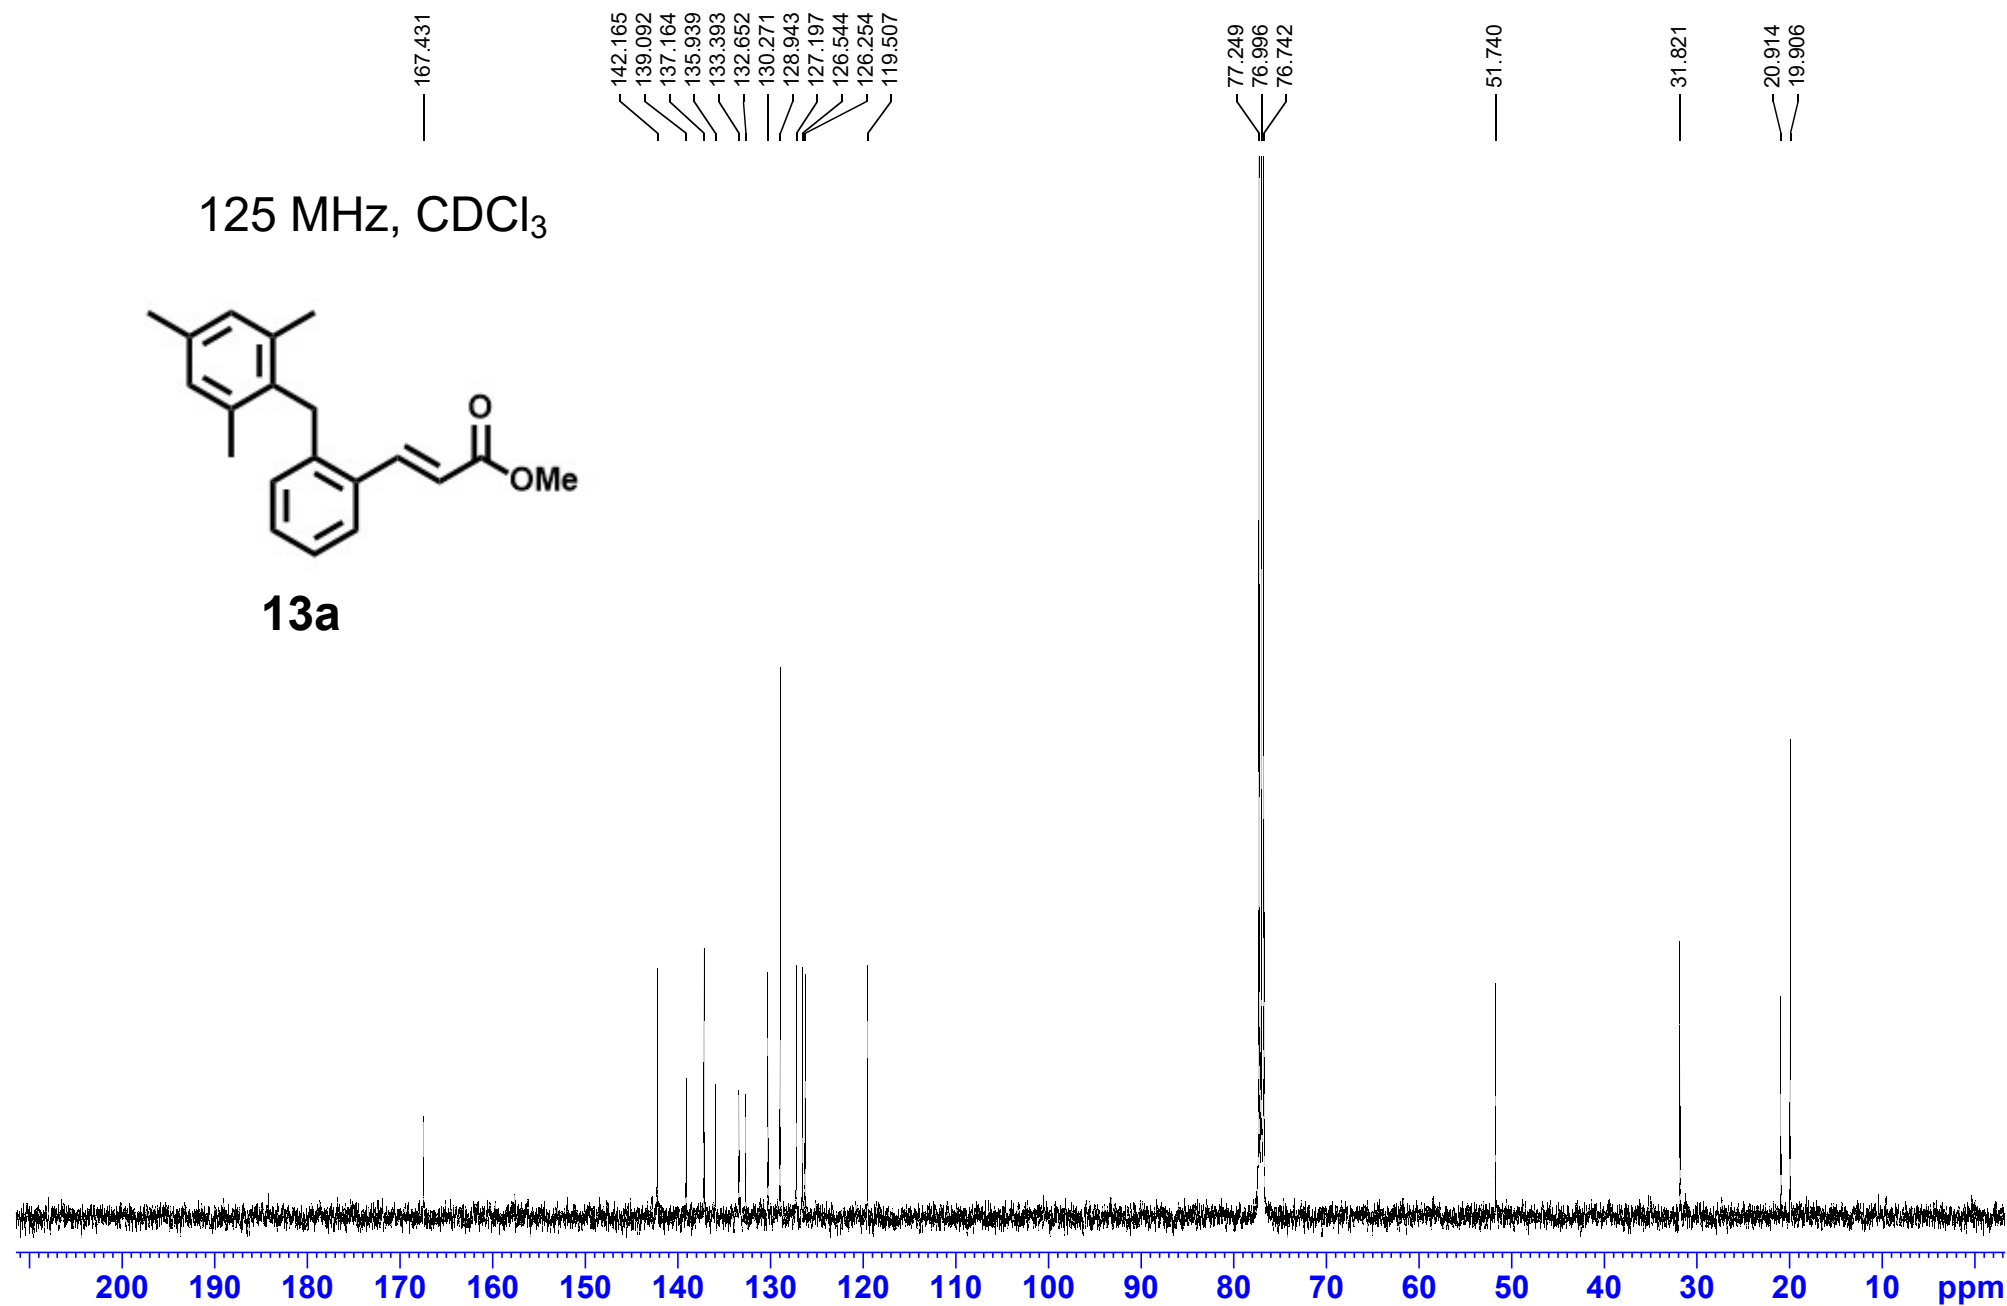

pmp.150 20, phenyl fused + p-xylene, 1H, 500, 1/19/22

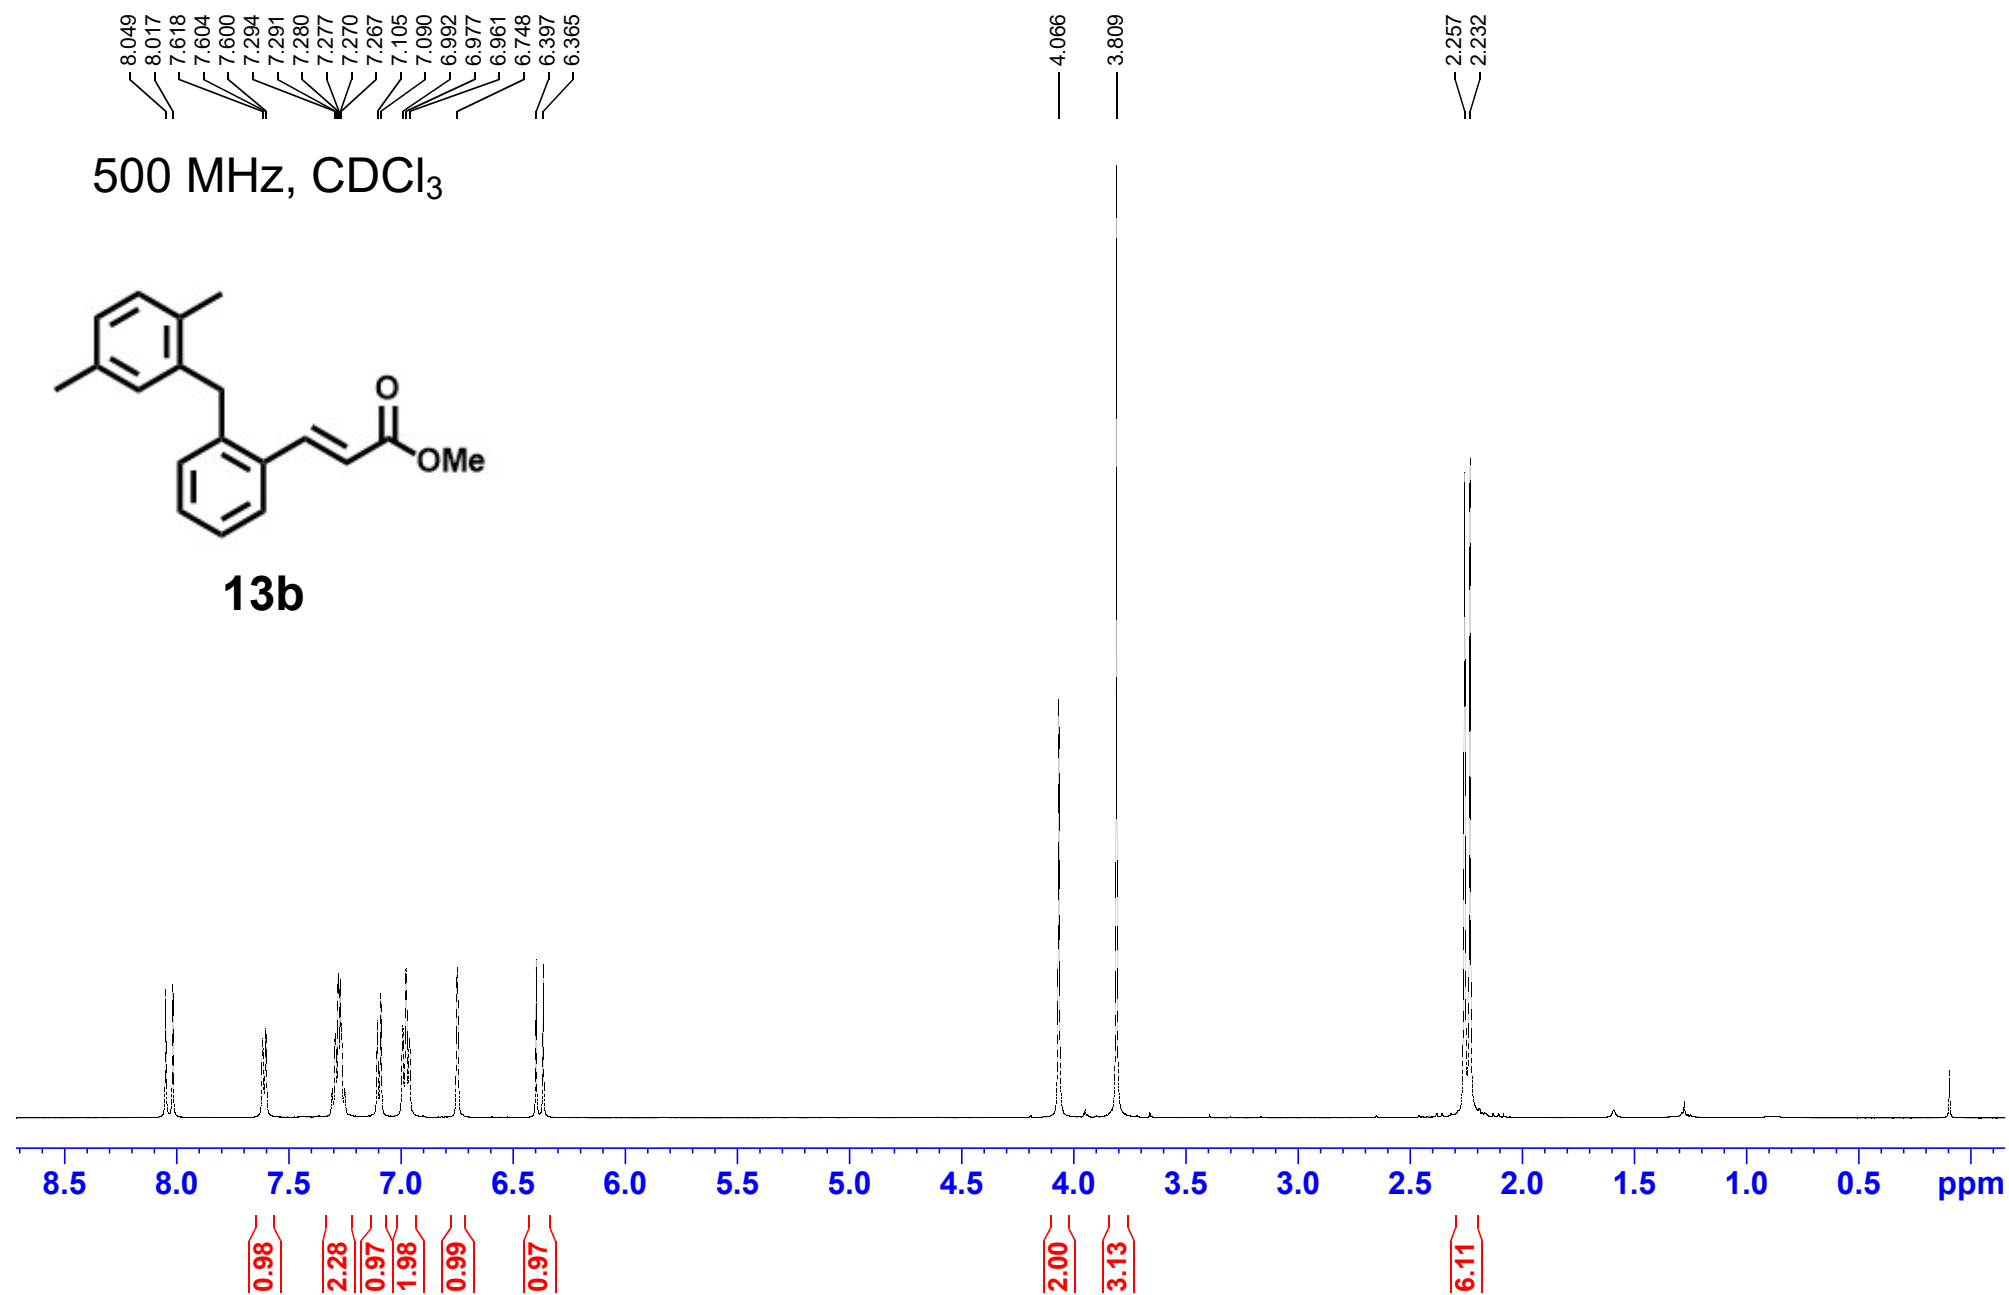

pmp.150 21, phenyl fused + p-xylene,  $^{13}\text{C}$ , 500/125, 1/19/22

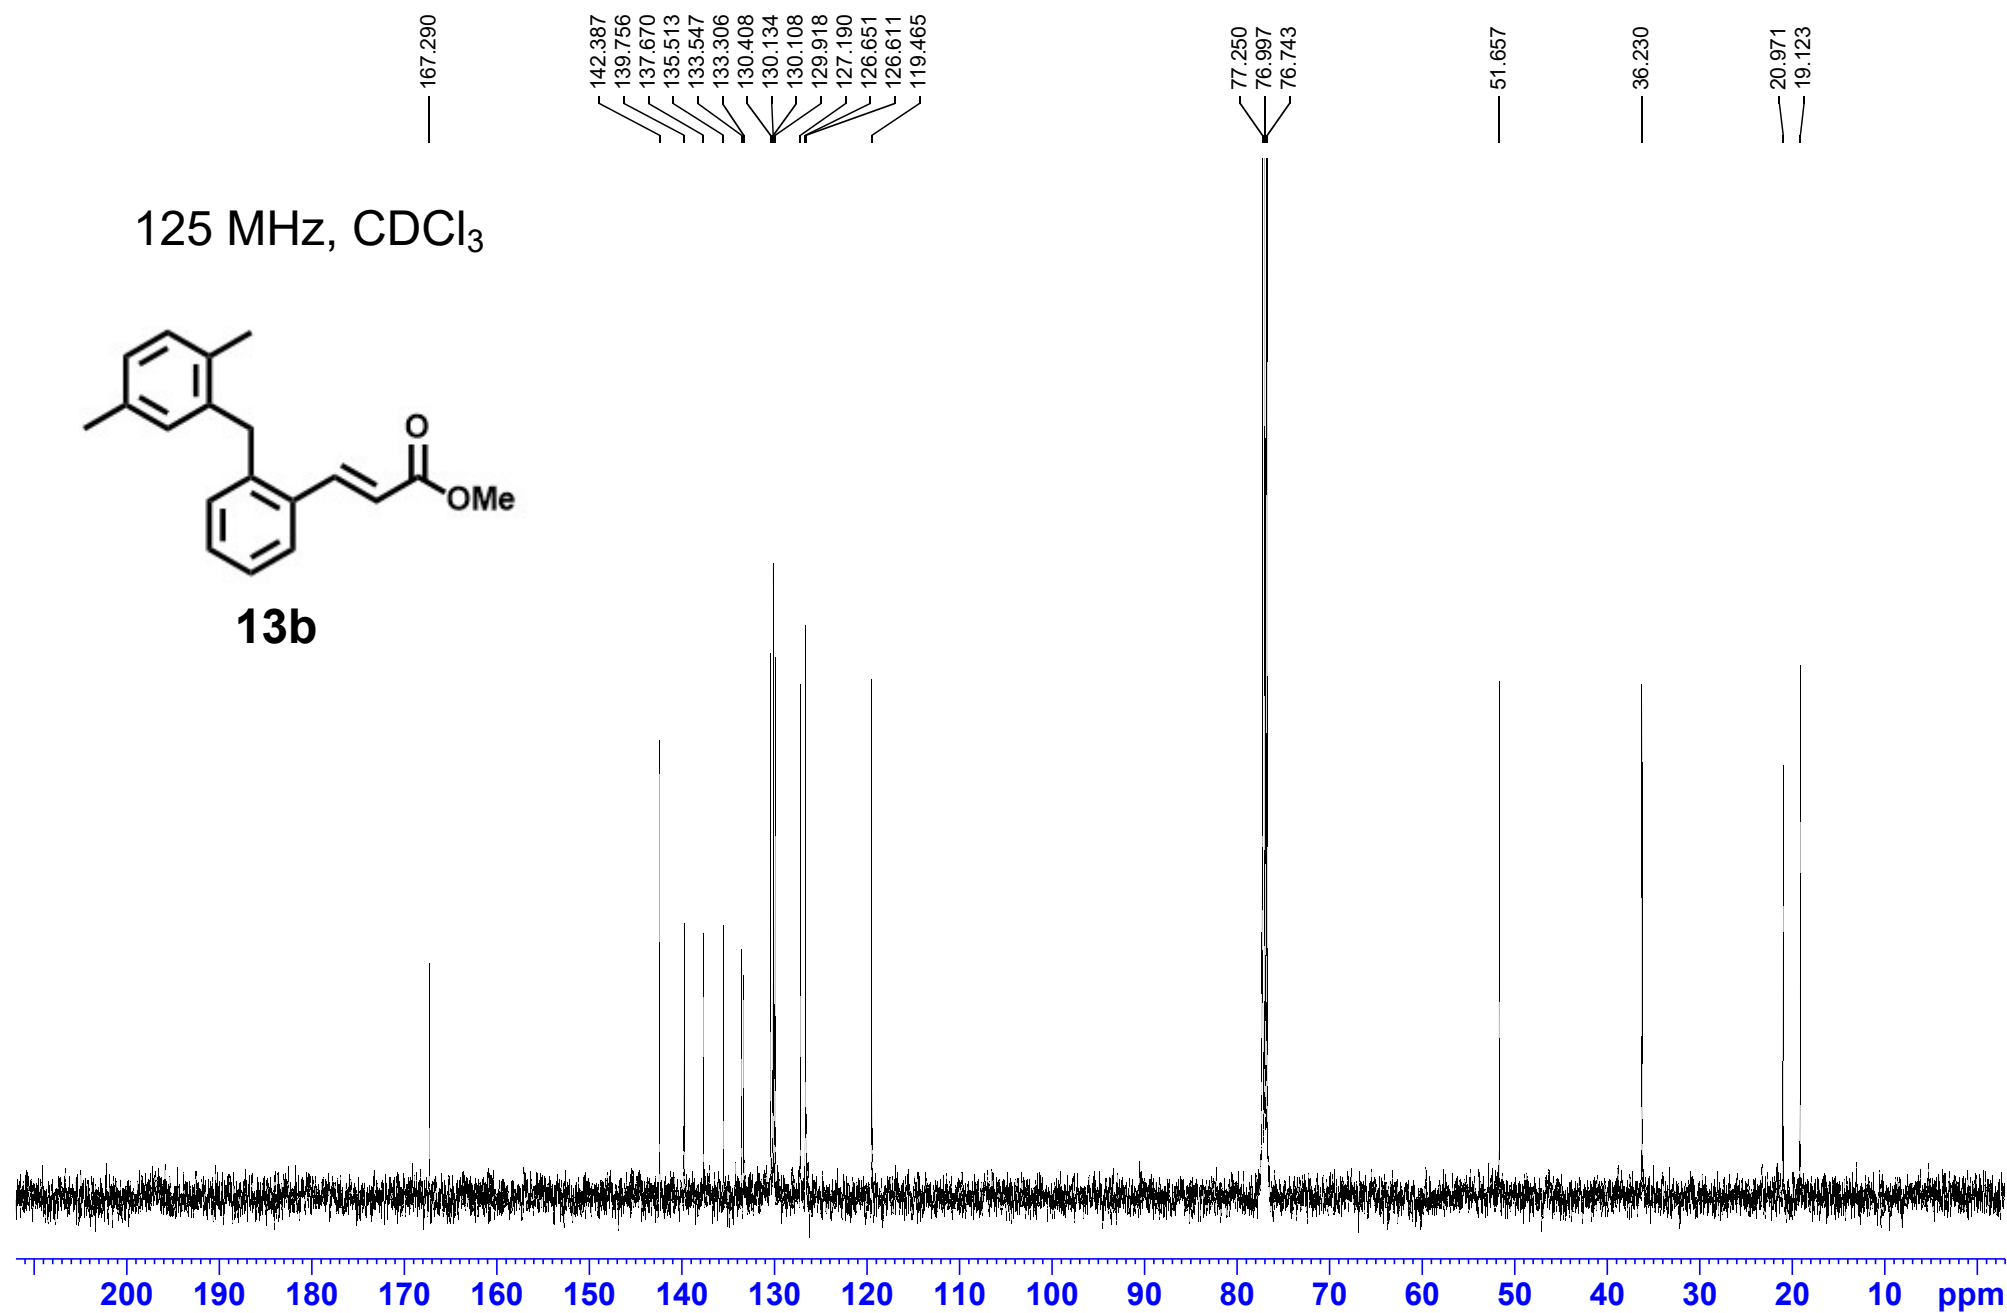

pmp.141 20, 1H, benzo + 1,3-MeO2Ph, B82-300, 1/26/22

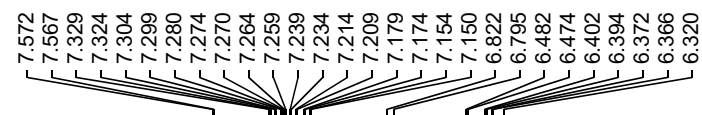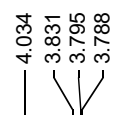

300 MHz, CDCl<sub>3</sub>

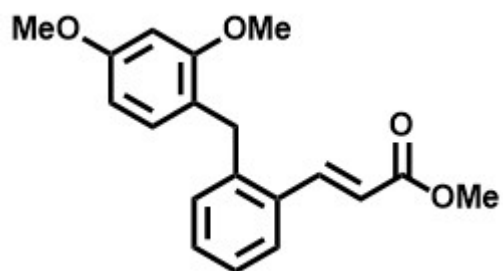

**13c**

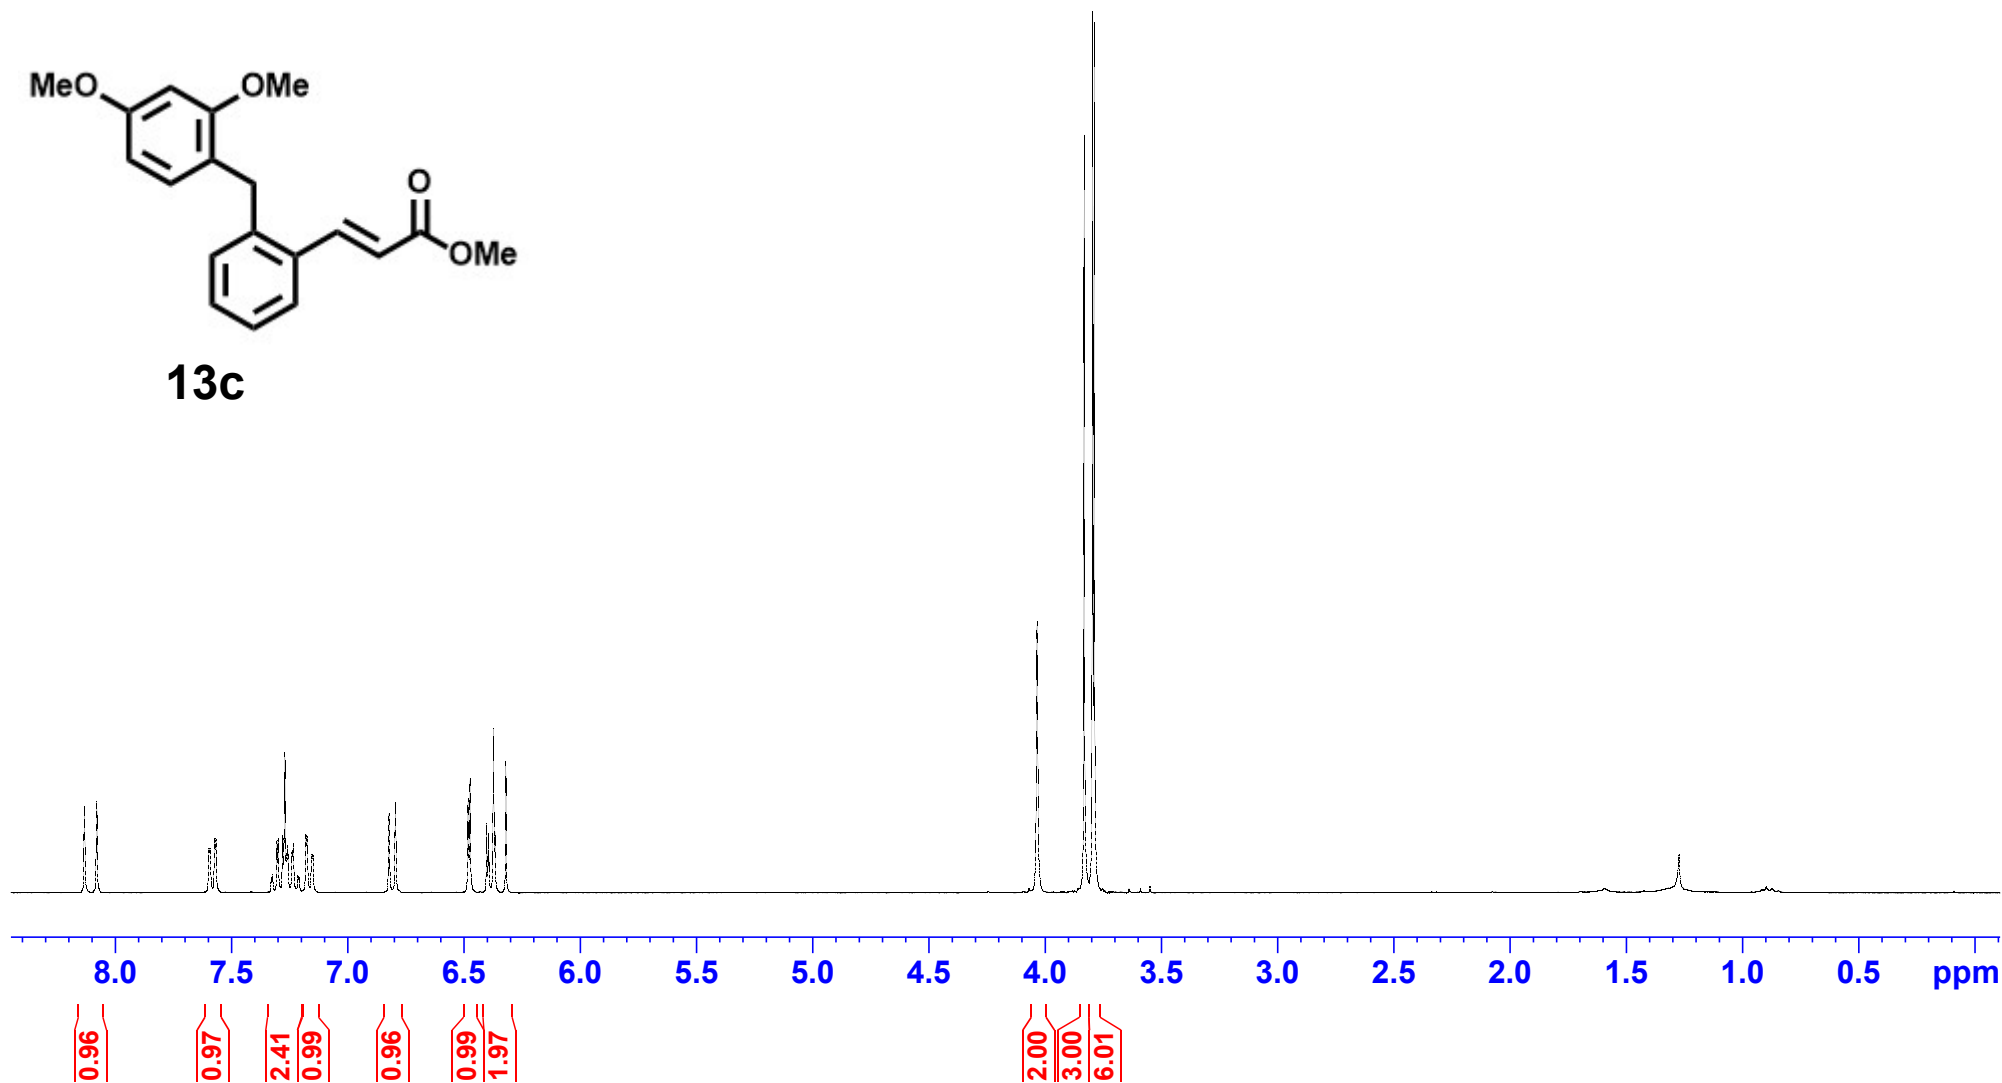

pmp.141 21, <sup>13</sup>C, benzo + 1,3-MeO<sub>2</sub>Ph, B82-300/75, 1/26/22

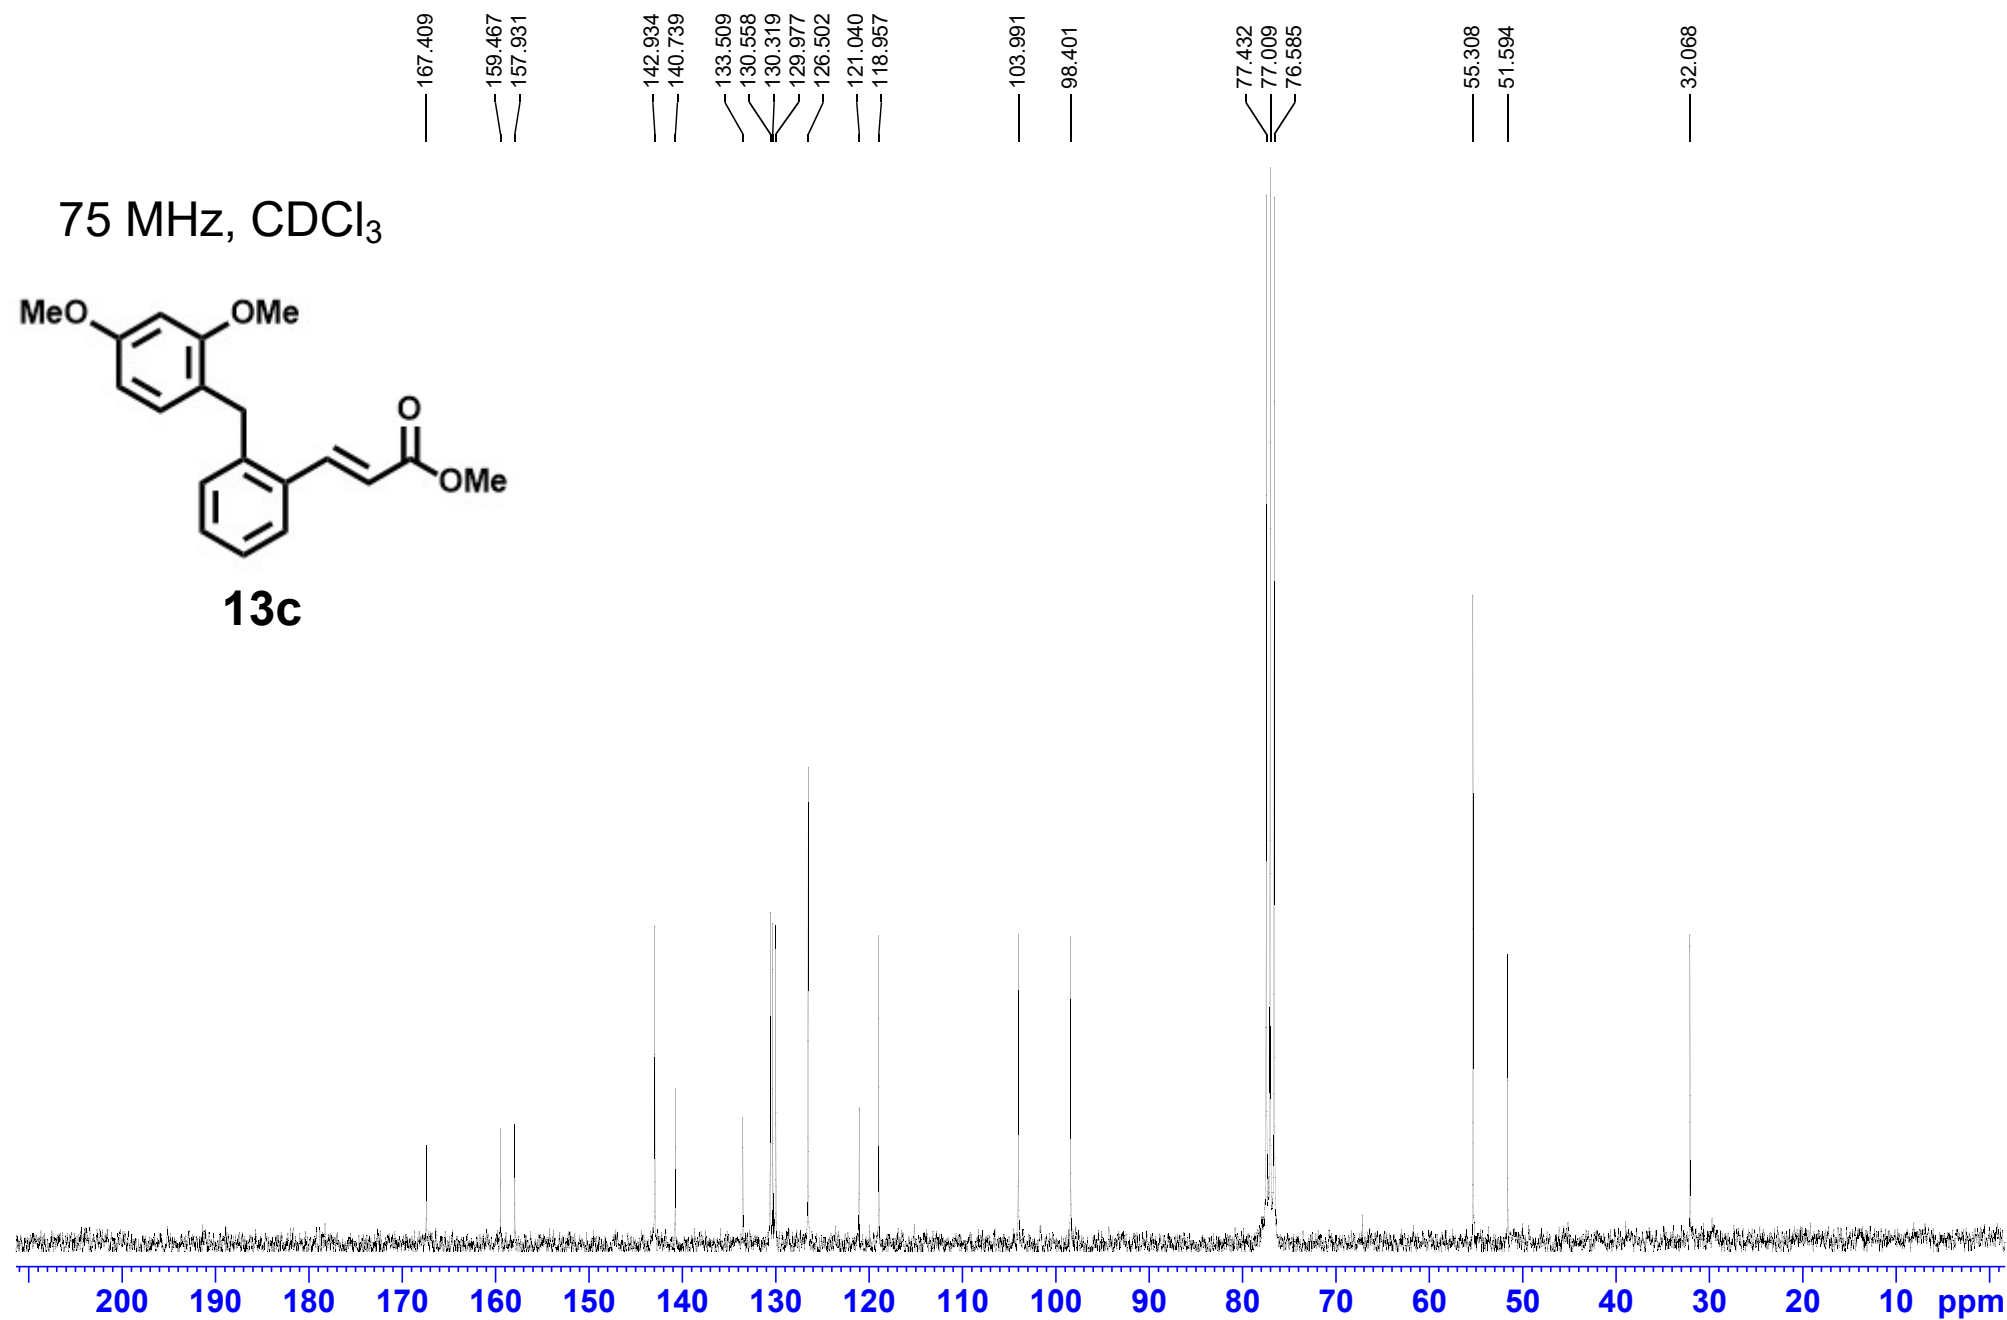

pmp.149 20, 1H, aryl fused substrate + 135-MeO3Ph, B82-300, 1/18/22

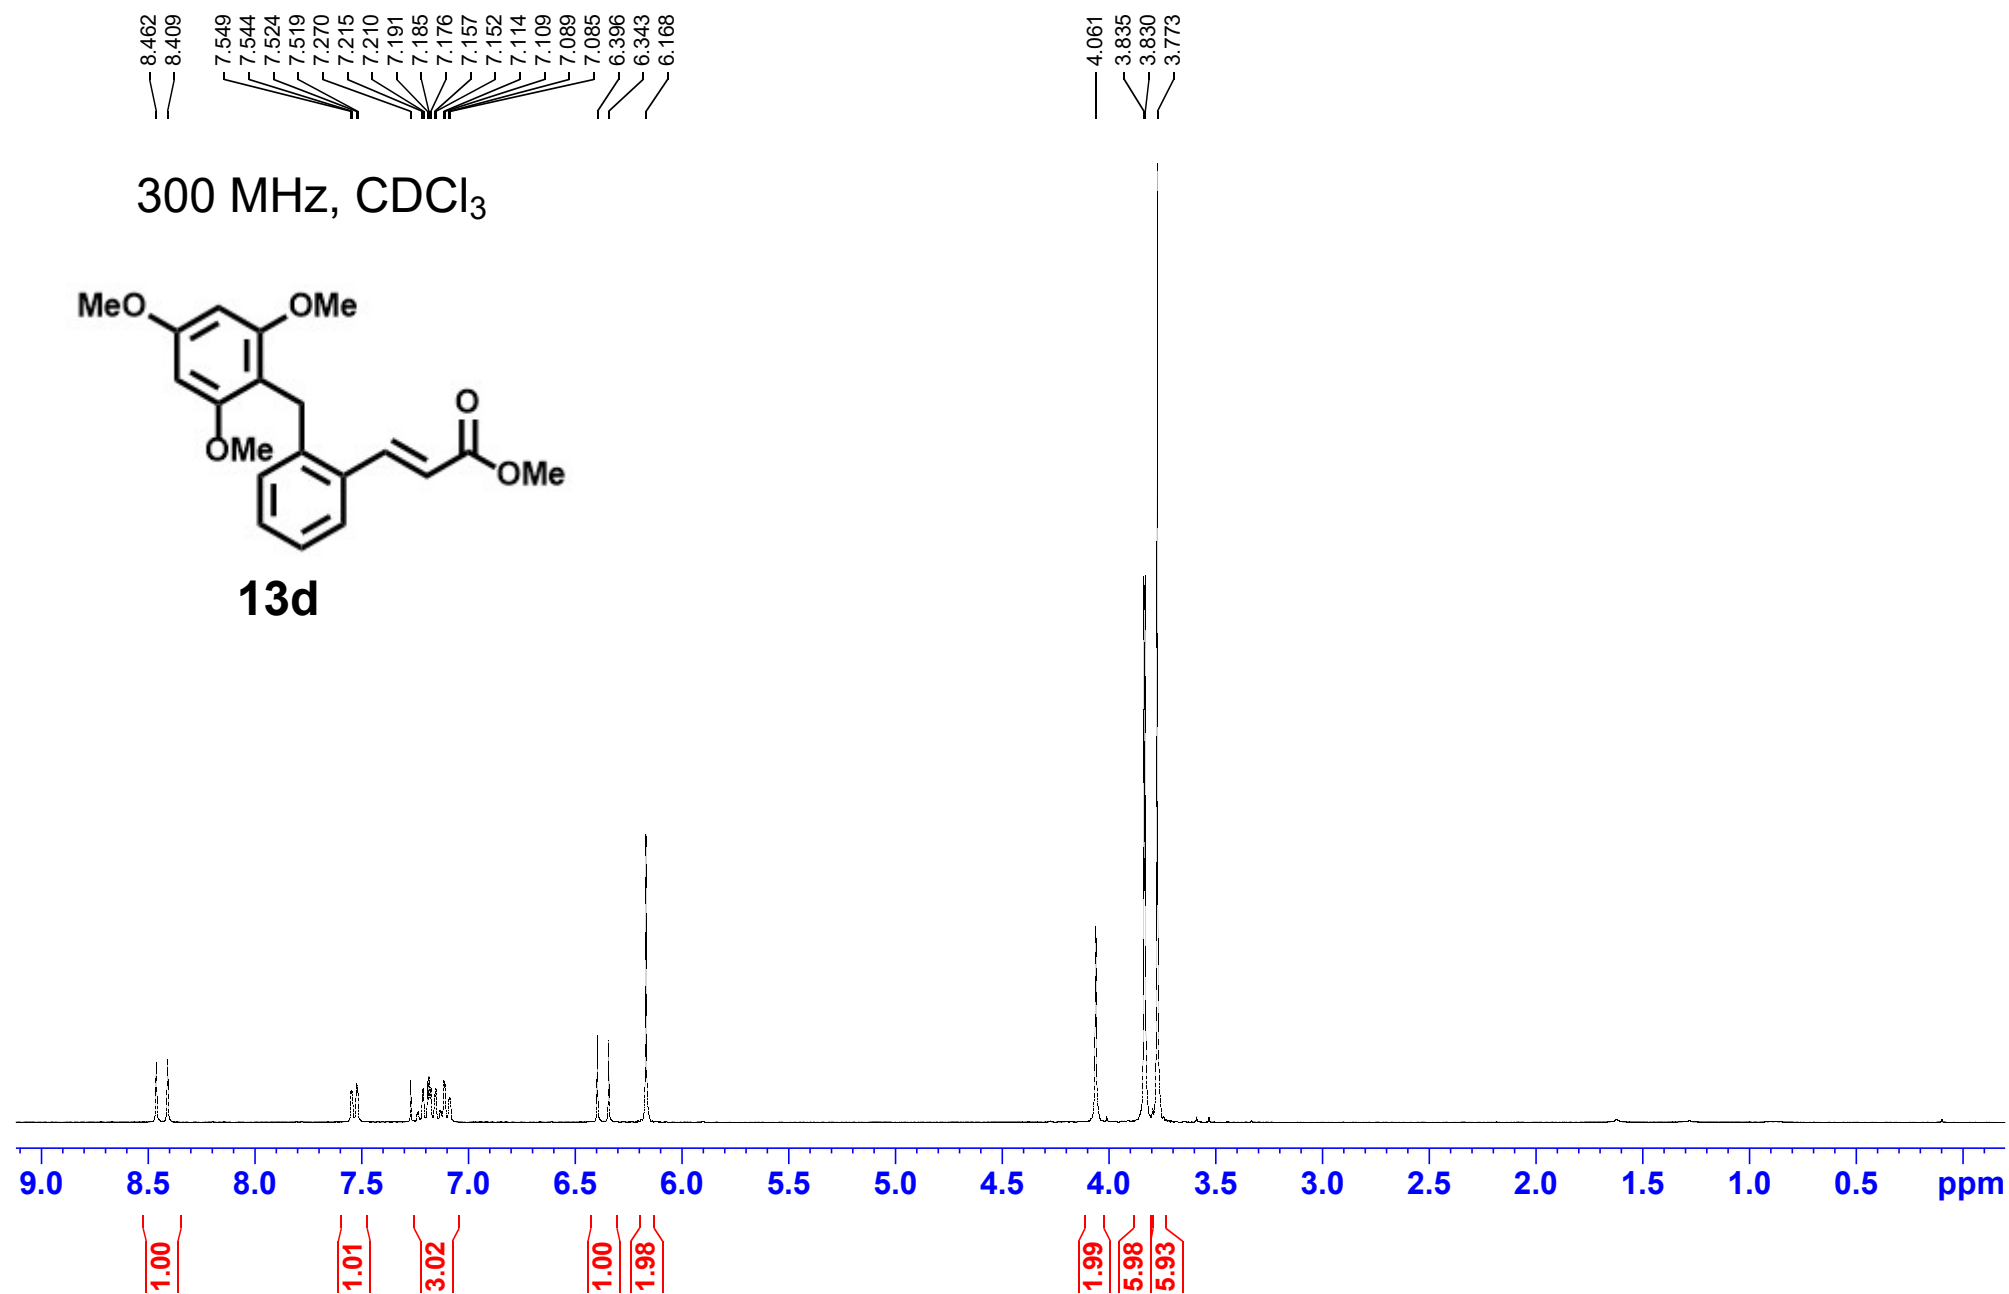

pmp.149 20,  $^{13}\text{C}$ , aryl fused substrate + 135-MeO3Ph, B82-300/75, 1/18/22

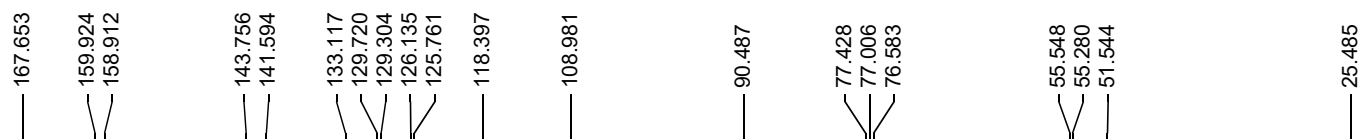

75 MHz,  $\text{CDCl}_3$

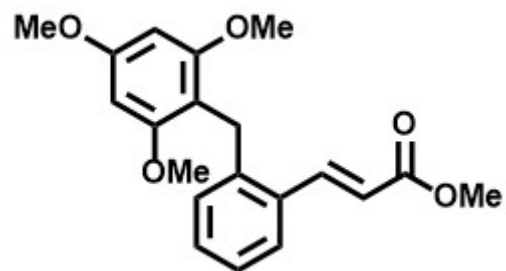

**13d**

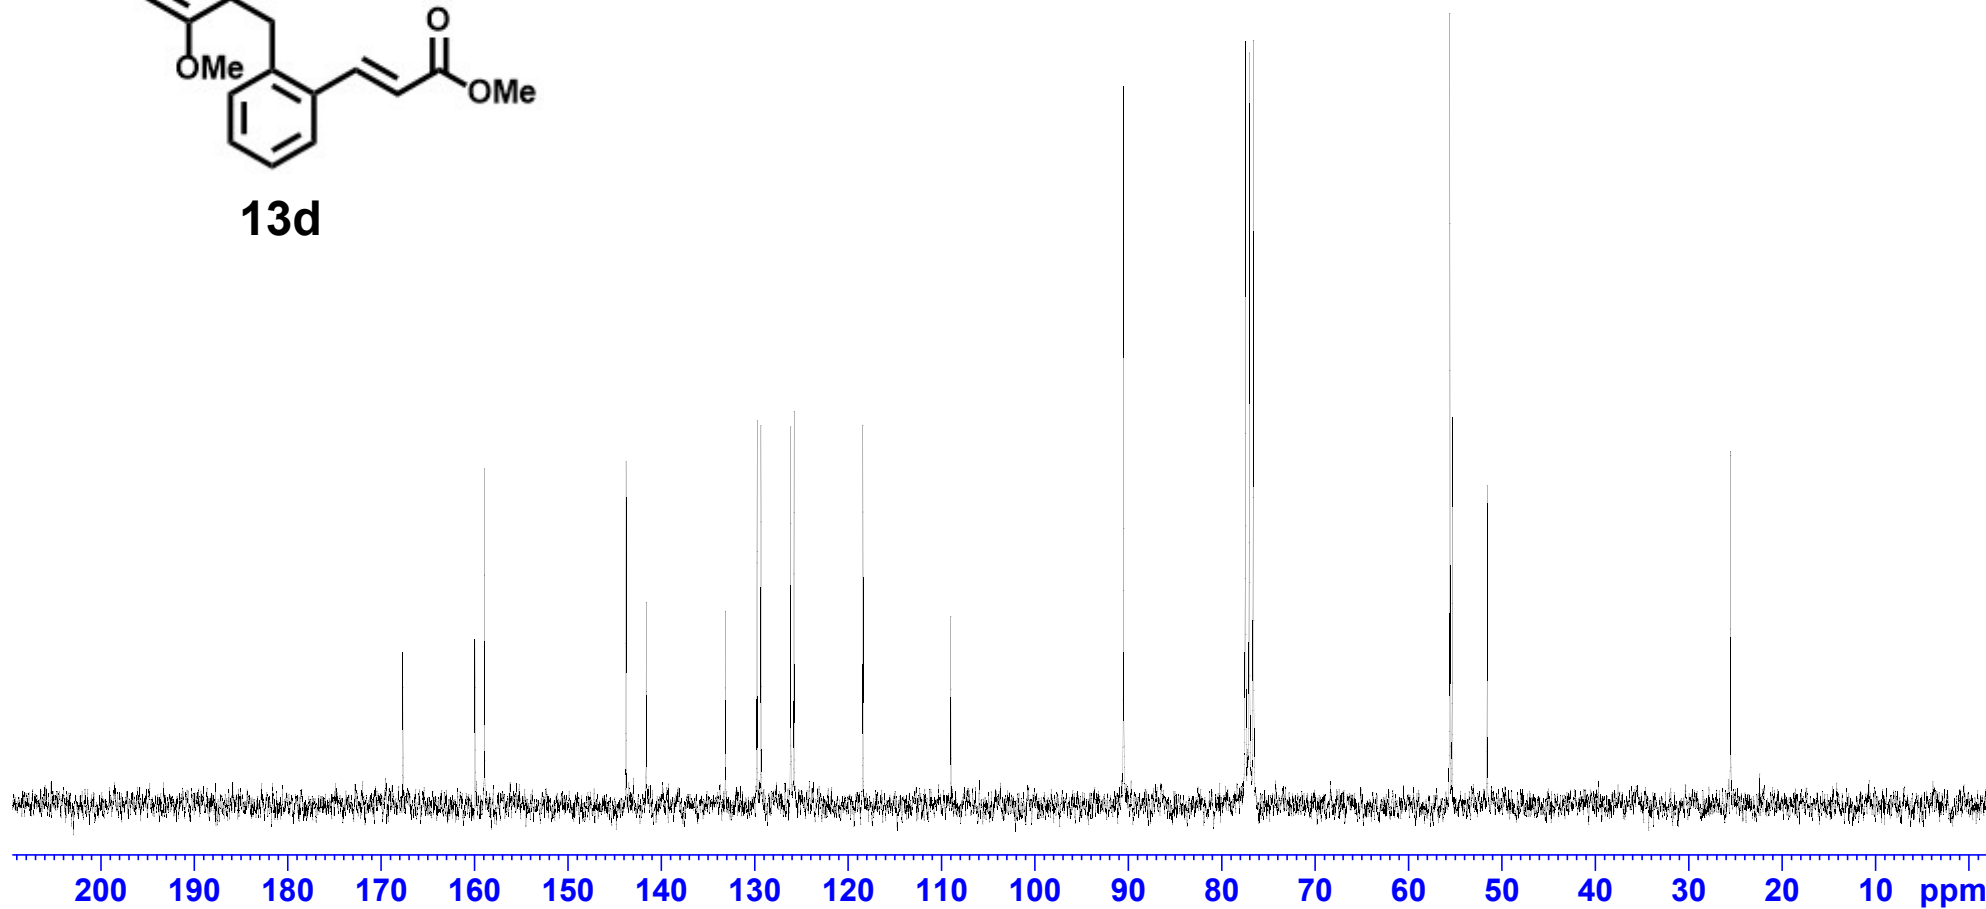

pmp.0147 20, benzo fused+ thiophene, DPX300, 2/2/22

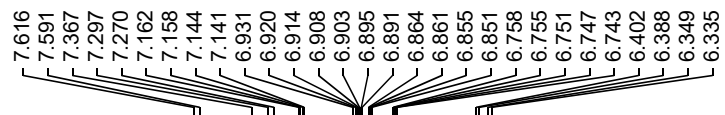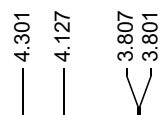

300 MHz, CDCl<sub>3</sub>

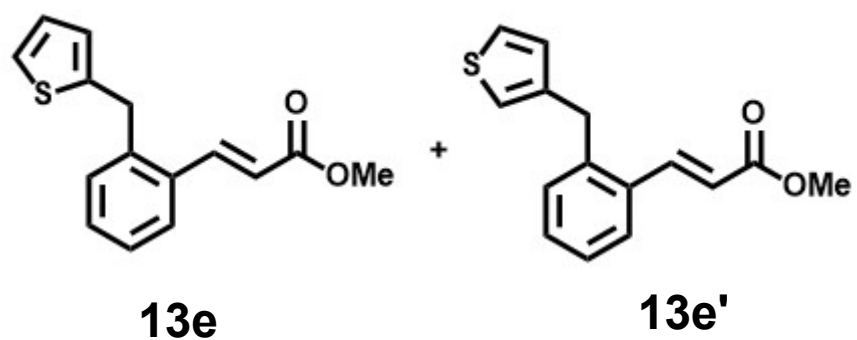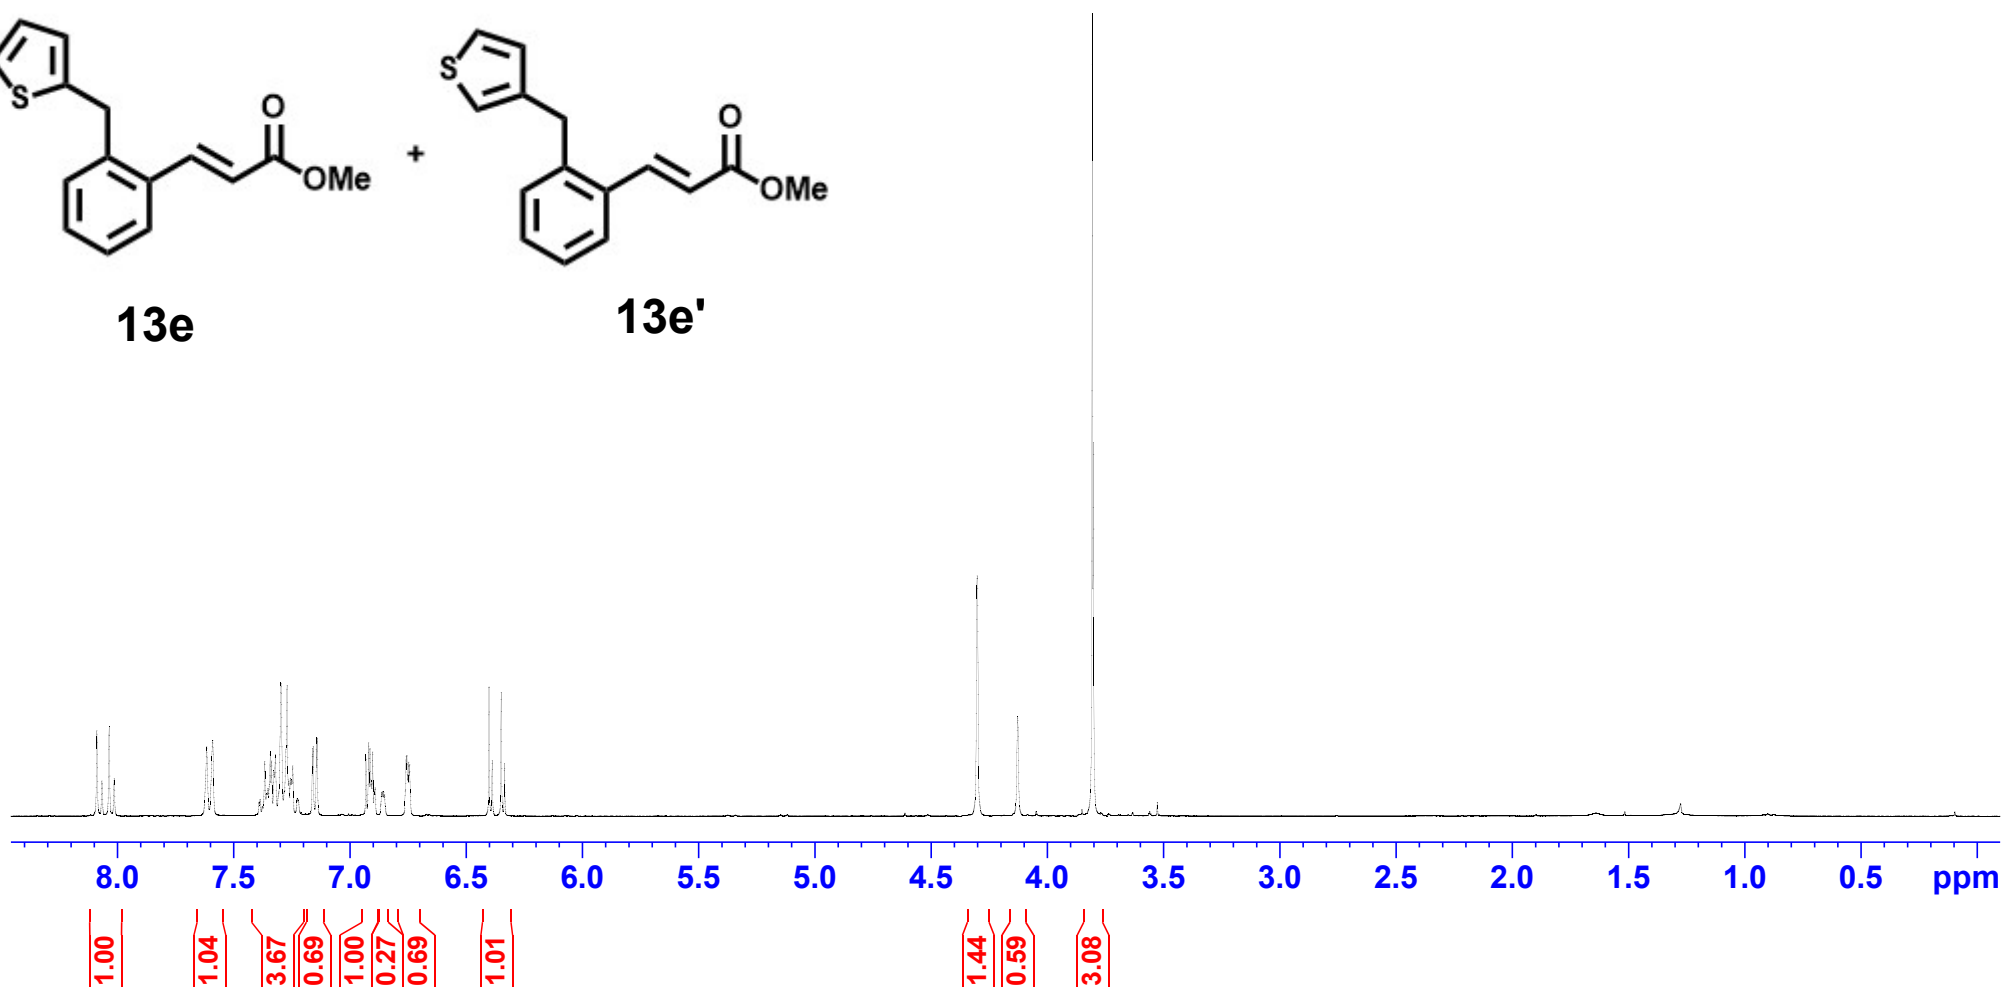

pmp.147 21, <sup>13</sup>C, benzo fused + thiophene, DPX 300/75, 2/2/22

167.240  
167.180  
143.093  
142.268  
141.998  
140.482  
139.883  
139.542  
133.247  
130.453  
130.358  
130.271  
130.219  
128.083  
127.302  
126.978  
126.859  
126.808  
126.736  
125.762  
125.241  
124.082  
121.467  
119.656  
119.370

77.421  
76.998  
76.575

51.661

33.934  
33.400

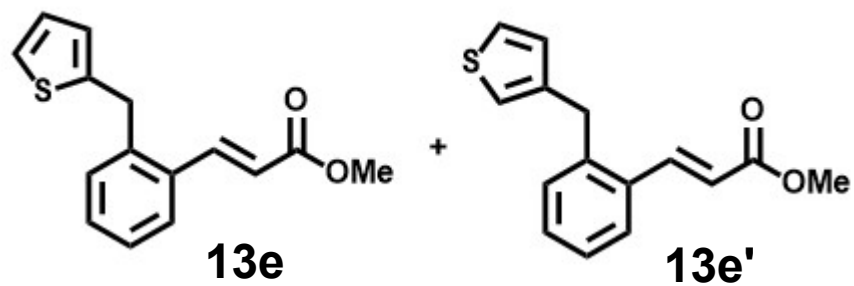

75 MHz, CDCl<sub>3</sub>

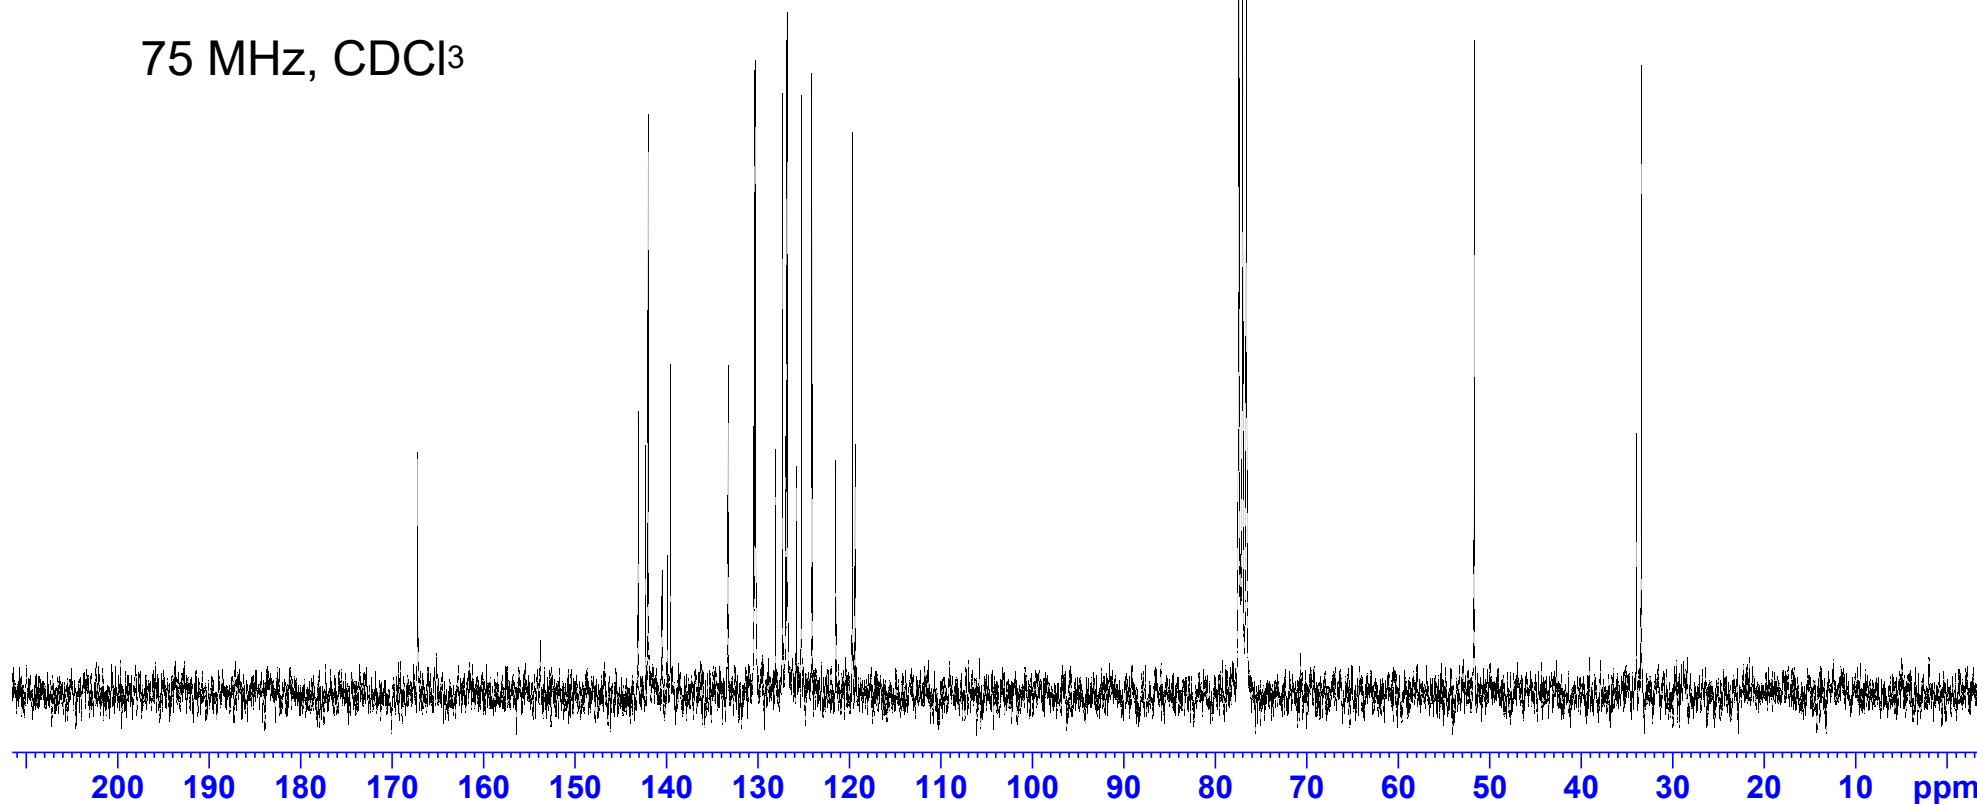

jrg.1487 2, aryl spaced cpd + GaCl<sub>3</sub> + benzene

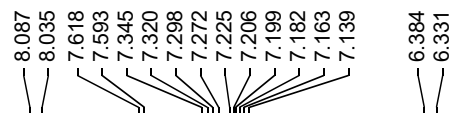

300 MHz, CDCl<sub>3</sub>

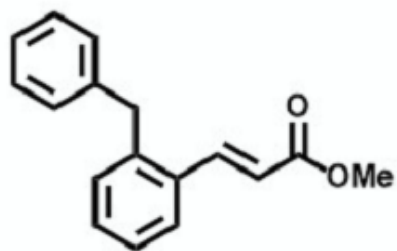

**13f**

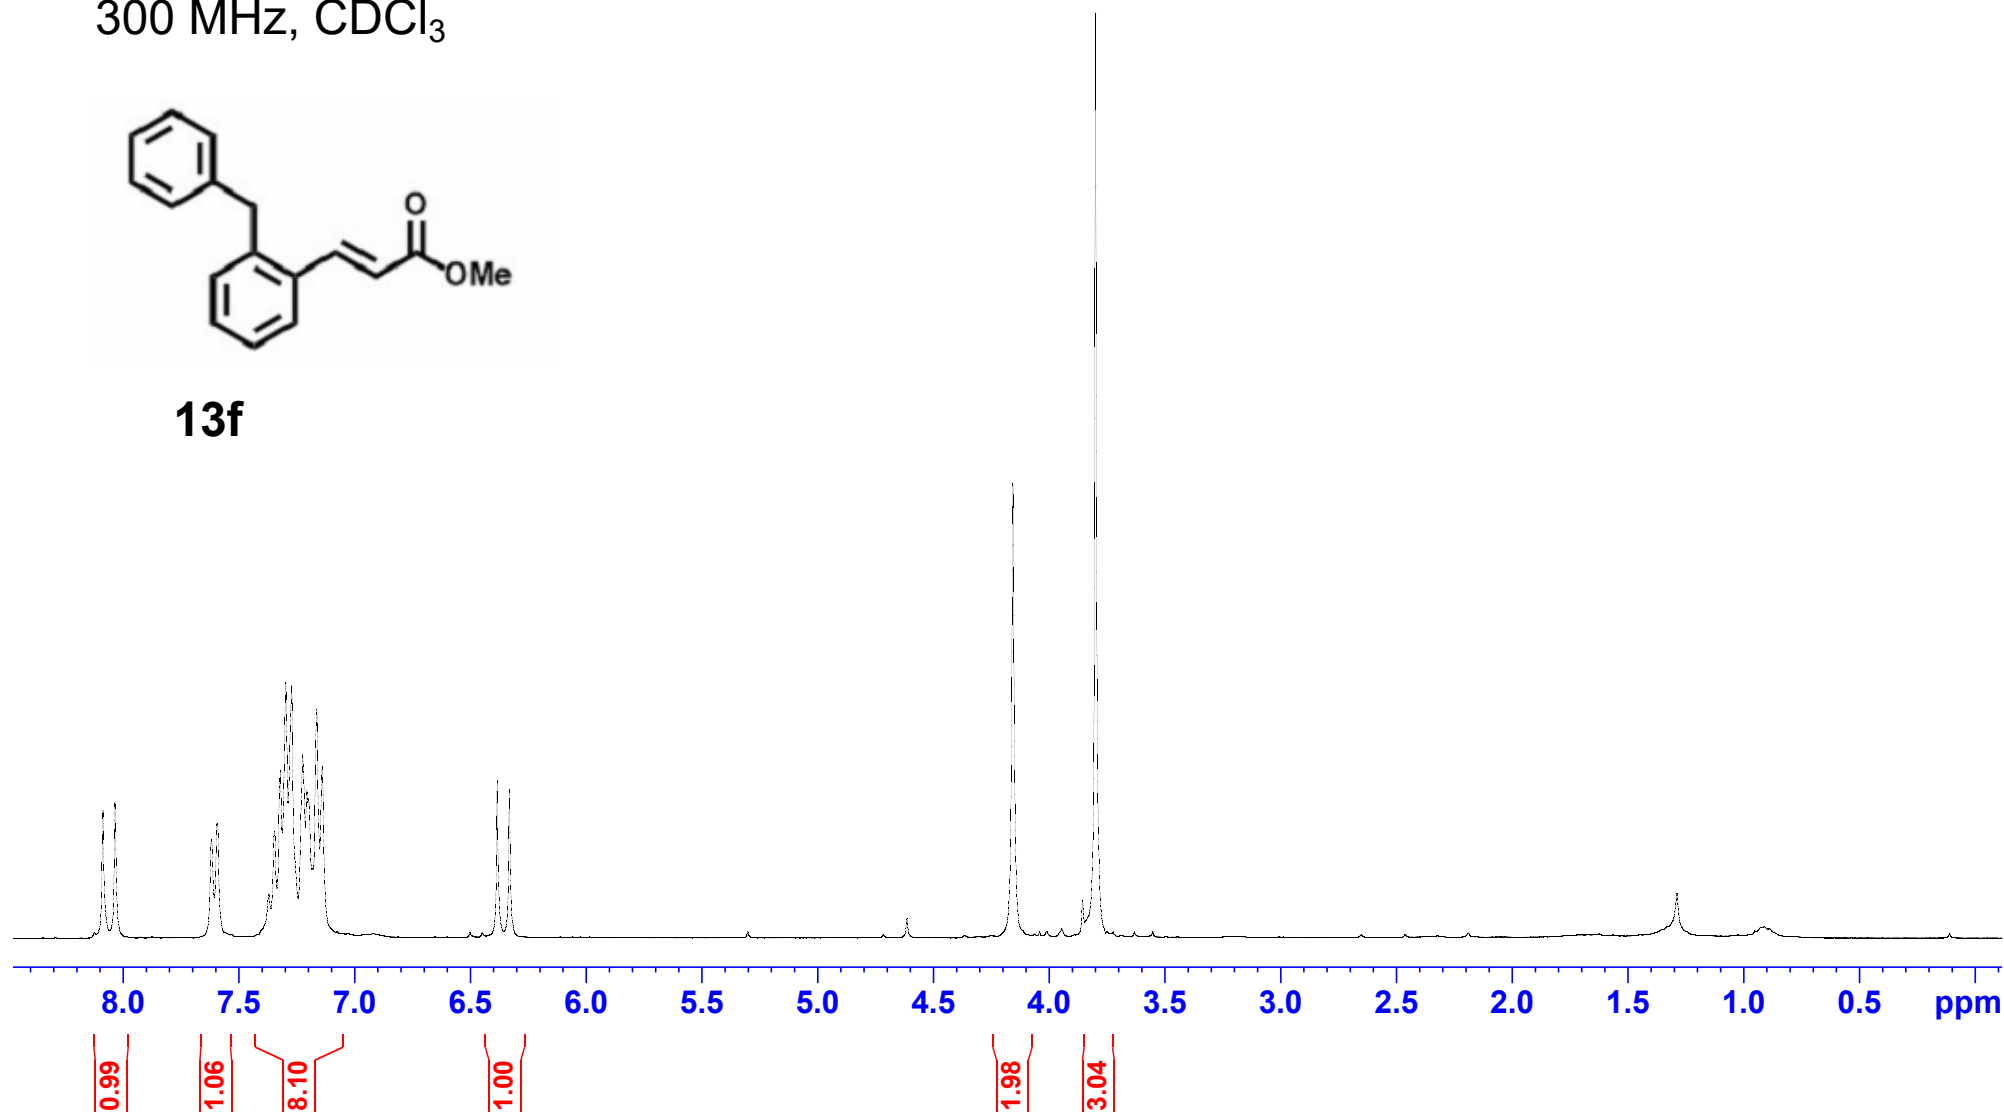

— 167.221

142.400  
140.147  
140.053  
133.472  
130.785  
130.138  
128.694  
128.519  
126.902  
126.738  
126.180  
119.376

77.424  
77.001  
76.577

— 51.623

— 38.916

75 MHz, CDCl<sub>3</sub>

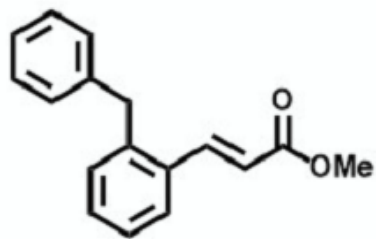

**13f**

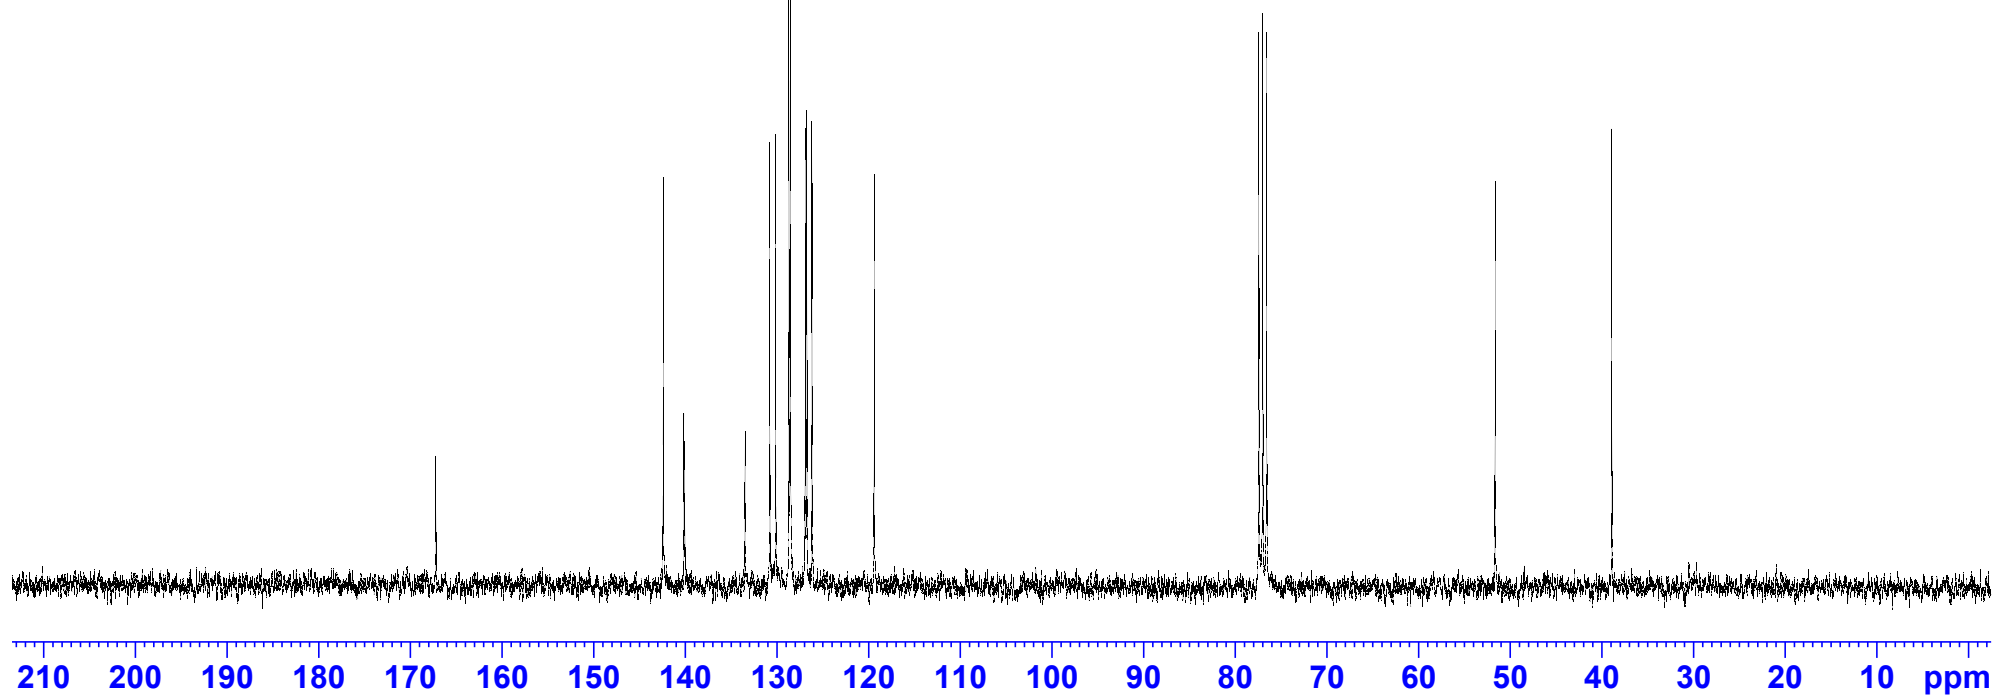

pmp.153 20, 1H, benzo + allylTMS, B82-300, 2/1/22

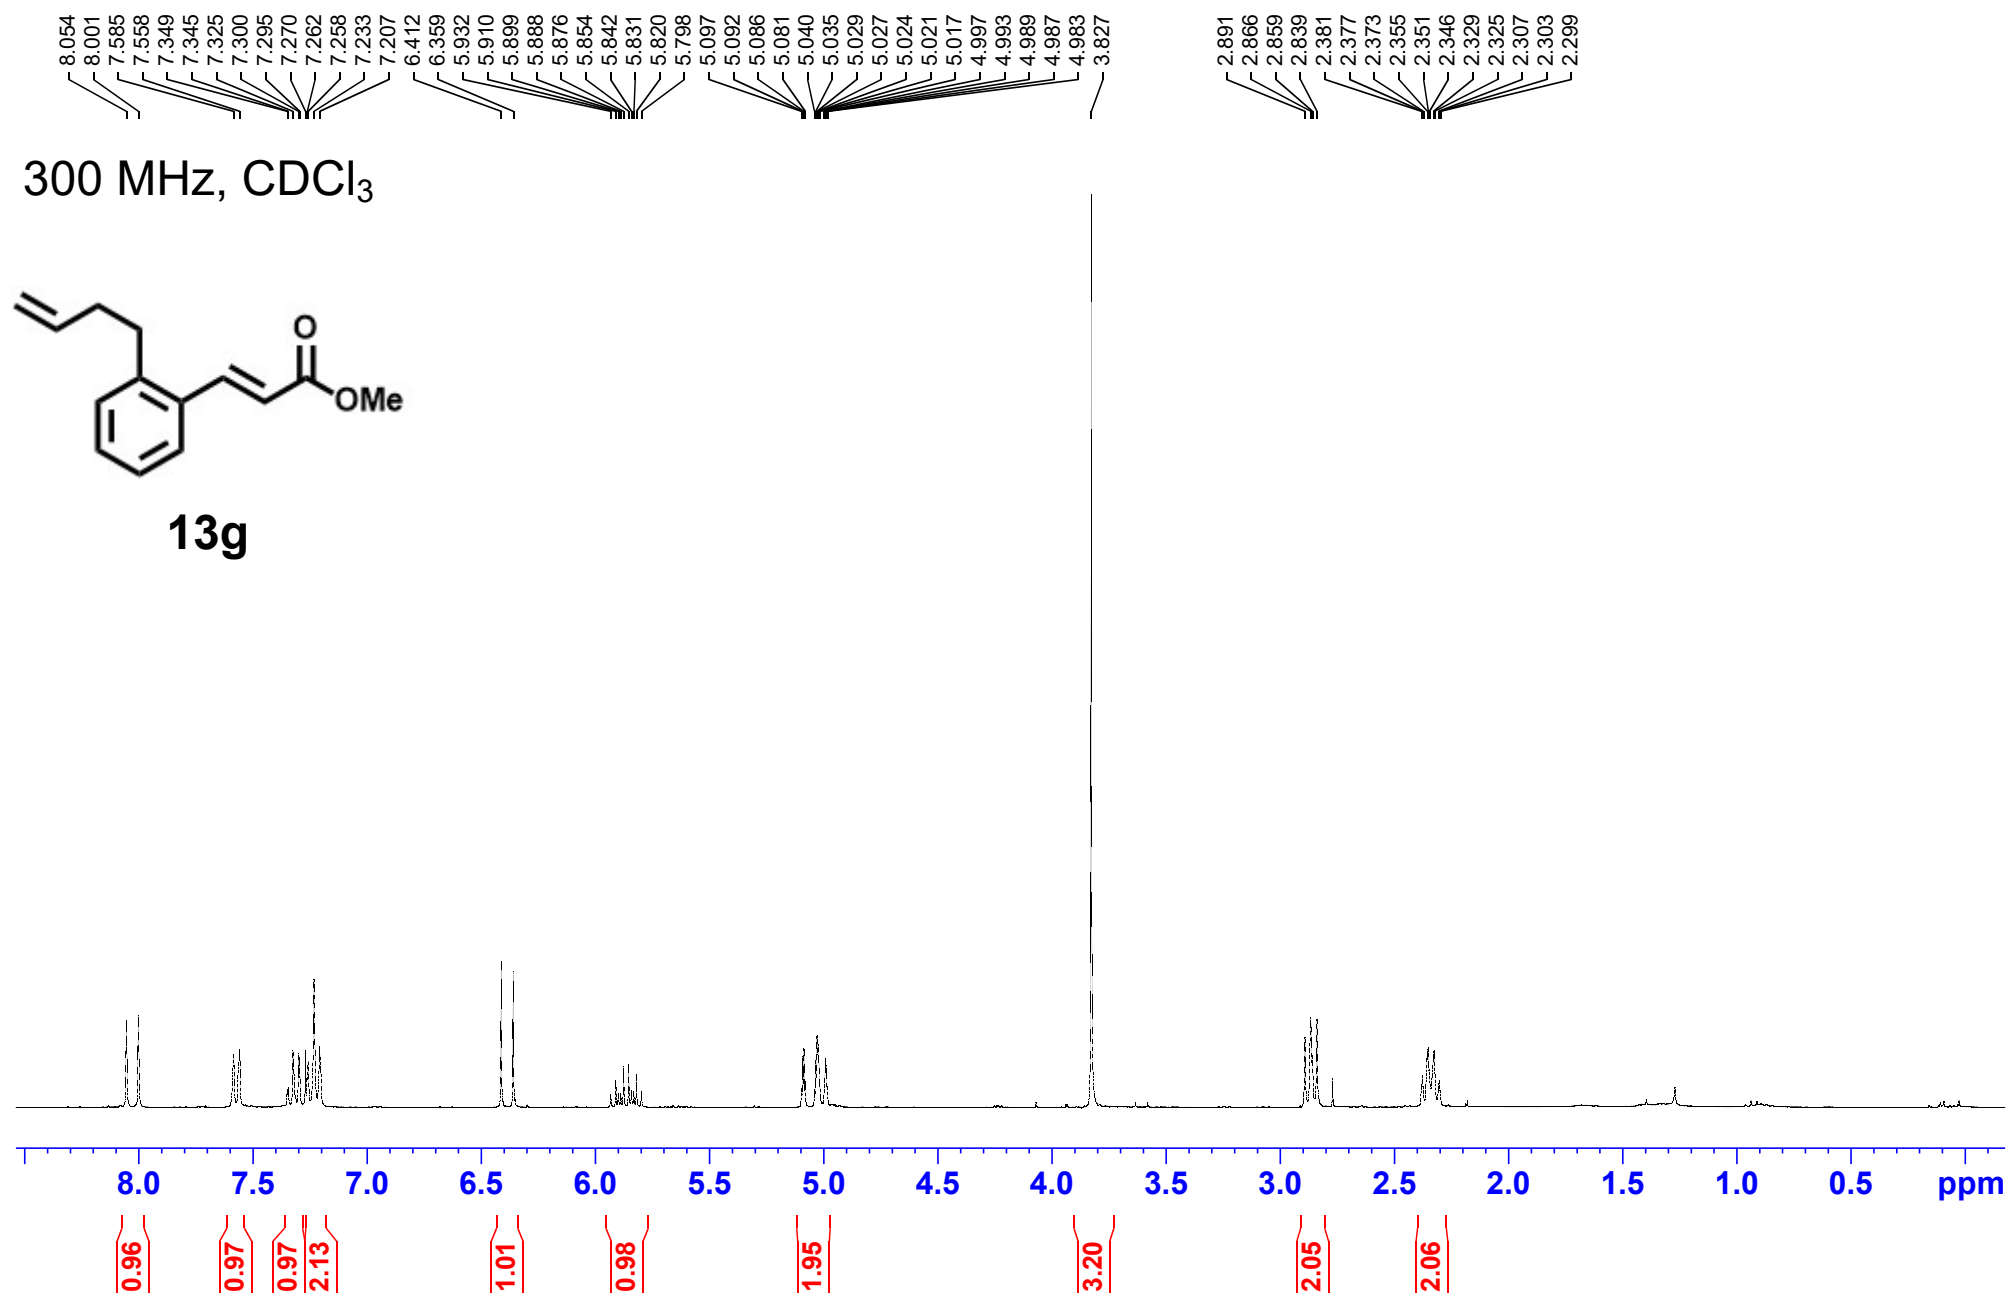

pmp.153 21, <sup>13</sup>C, benzo fused + allylTMS, B-82 300/75, 2/1/22

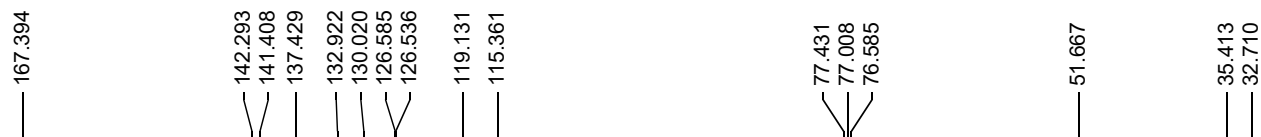

75 MHz, CDCl<sub>3</sub>

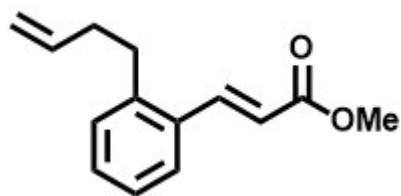

**13g**

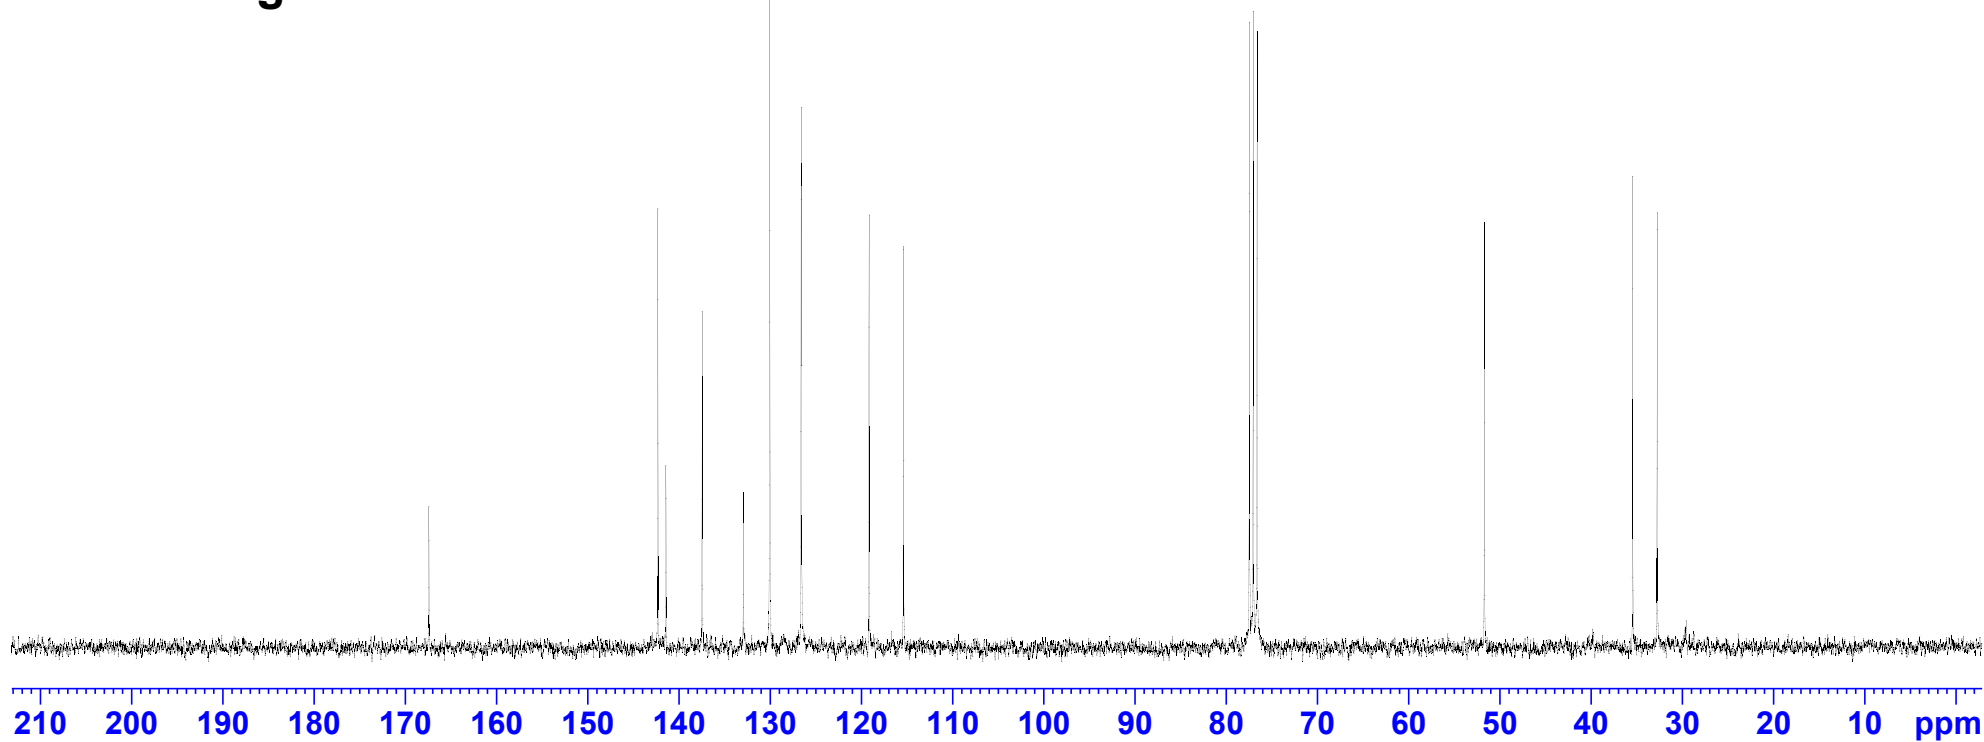

jrg.1491 20, pages Ph spaced substarte + InCl3 + propiophen Si enol, rflx, B82-300

7.885  
7.880  
7.571  
7.566  
7.546  
7.522  
7.471  
7.466  
7.450  
7.445  
7.422  
7.275  
7.270  
7.252  
7.246  
7.238  
7.219  
7.199  
7.194  
6.433  
6.380

3.837  
3.759  
3.737  
3.711  
3.688  
3.341  
3.318  
3.294  
3.272  
2.903  
2.877  
2.856  
2.830

1.200  
1.177

300 MHz, CDCl<sub>3</sub>

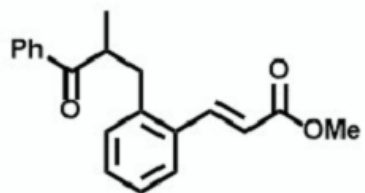

**13h**

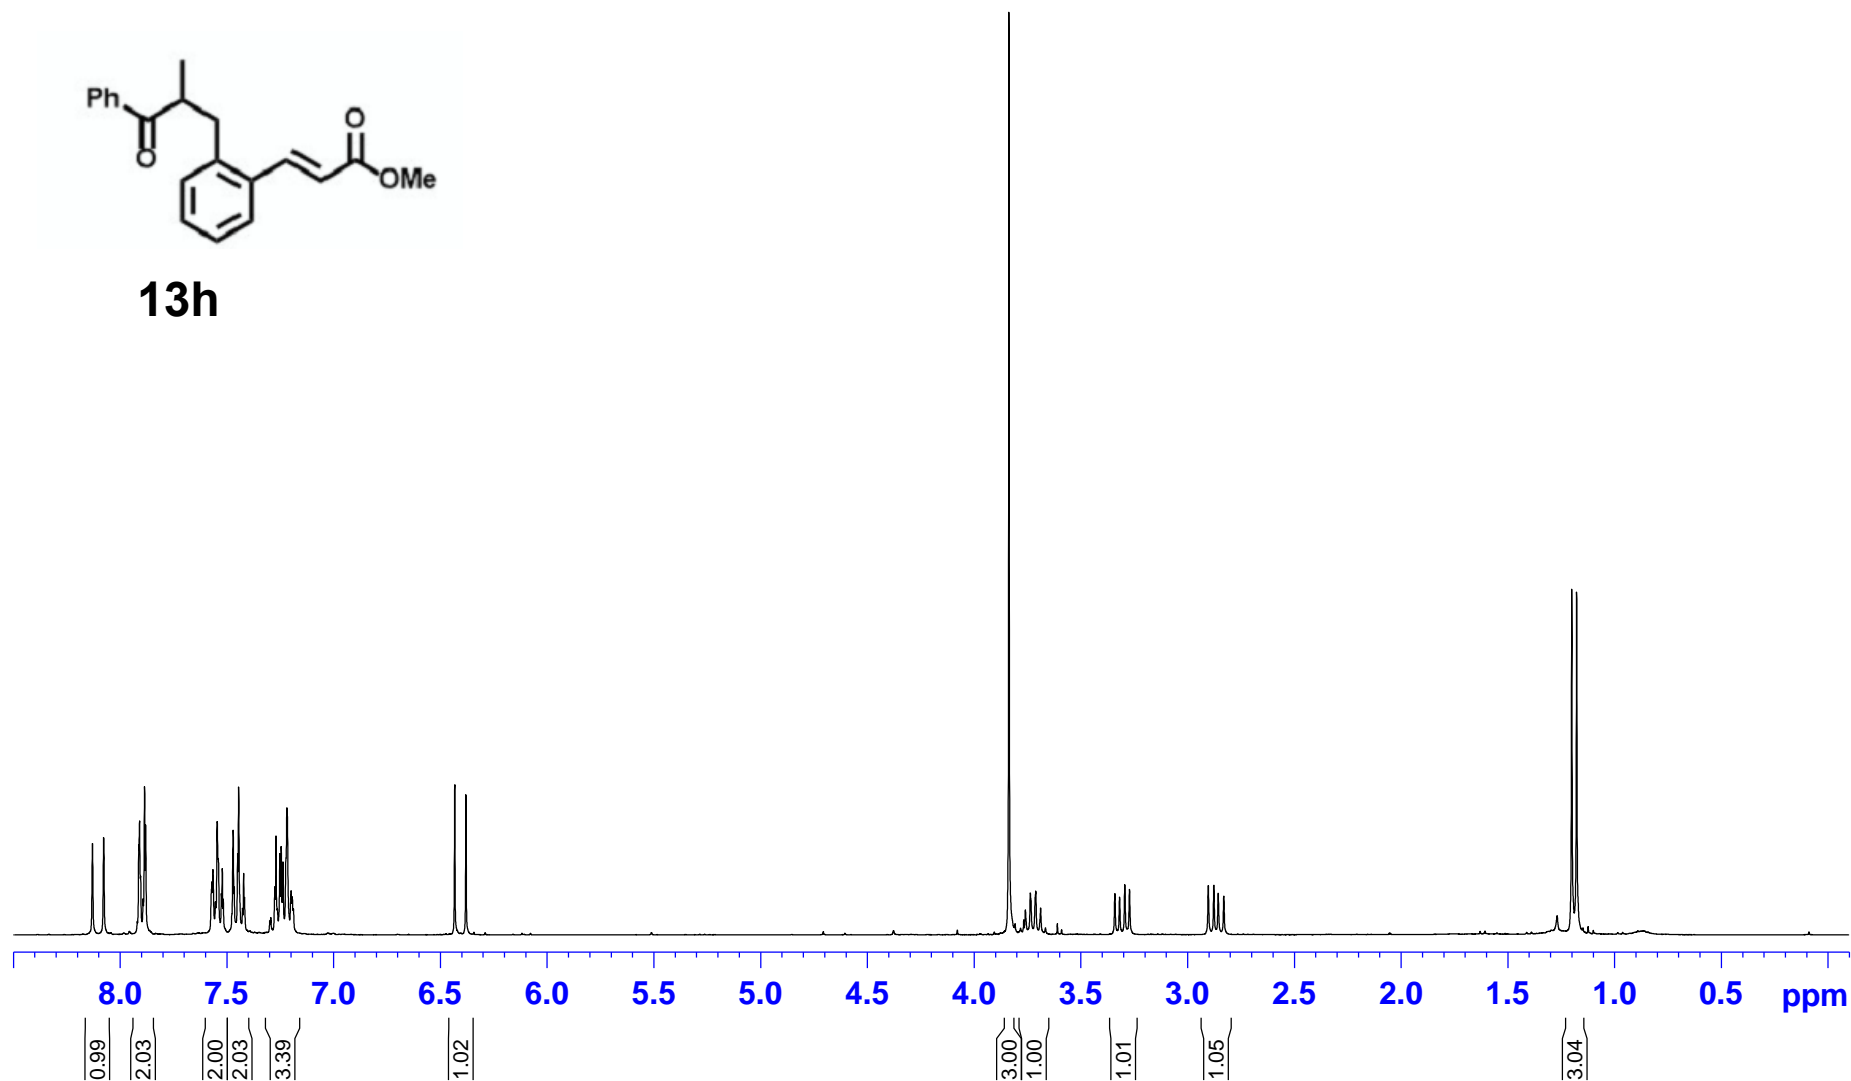

jrg.1491 21, pages Ph spaced substarte + InCl3 + propiophen Si enol, B82-300/75MHz,

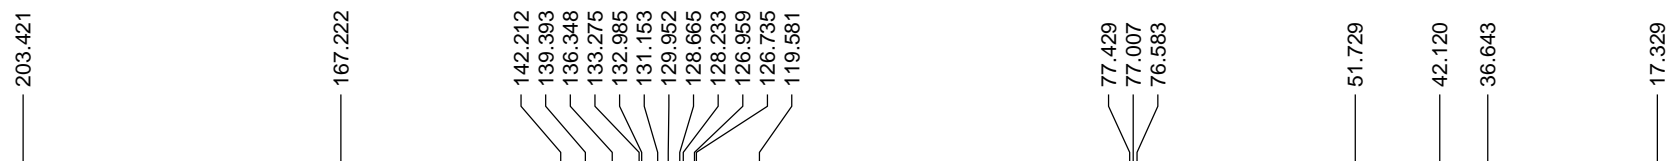

300 MHz, CDCl<sub>3</sub>

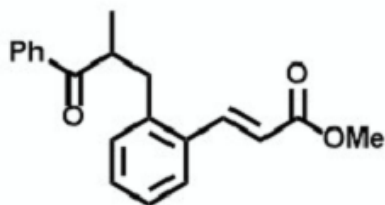

**13h**

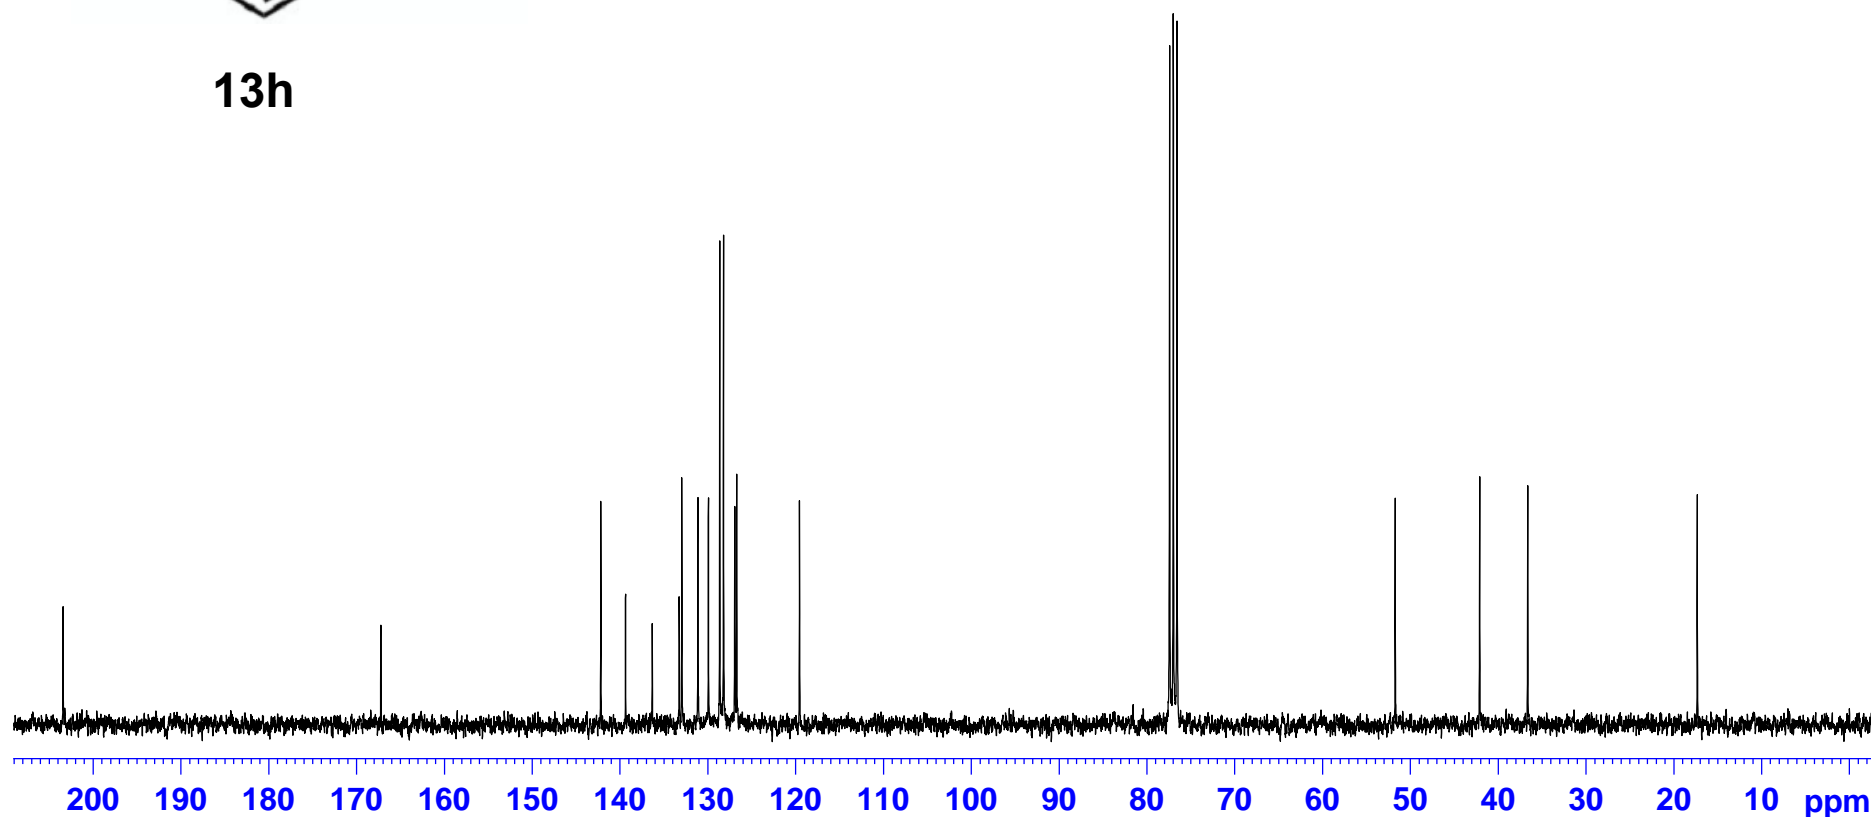

## Allyl bromide 7

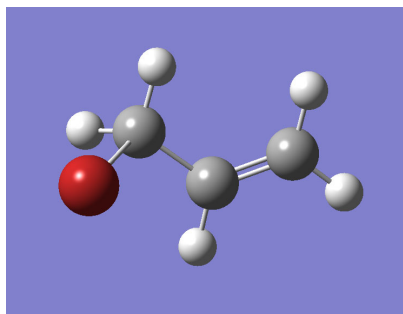

```
%chk=propene3.chk
%mem=1024MB
%nprocs=8
# opt b3lyp/6-311++g(d,p)  scrf=(solvent=dichloromethane)

propene

0 1
Br      -4.15384620    0.07692308    0.00000000
C       -6.06384620    0.07692308    0.00000000
H       -6.42051255    0.55052859    0.89072270
H       -6.42051255    0.61150859   -0.85551590
C       -6.57717980   -1.37411828   -0.05067148
H       -5.88025262   -2.18553040   -0.07900646
C       -7.90857136   -1.62687438   -0.05949811
H       -8.60997214   -0.81937431   -0.08917306
H       -8.25957734   -2.63740676   -0.03671404
```

## Allyl Cation 7+

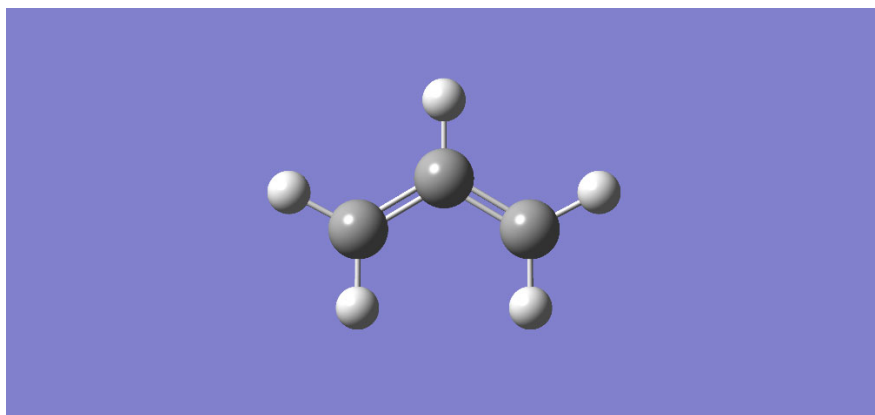

```
%chk=propeneion3.chk  
%mem=1024MB  
%nprocs=8  
# opt b3lyp/6-311++g(d,p) scrf=(solvent=dichloromethane)
```

propene

1 1

|   |             |             |             |
|---|-------------|-------------|-------------|
| C | -6.06384620 | 0.07692308  | 0.00000000  |
| H | -6.42051255 | 0.55052859  | 0.89072270  |
| H | -6.42051255 | 0.61150859  | -0.85551590 |
| C | -6.57717980 | -1.37411828 | -0.05067148 |
| H | -5.88025262 | -2.18553040 | -0.07900646 |
| C | -7.90857136 | -1.62687438 | -0.05949811 |
| H | -8.60997214 | -0.81937431 | -0.08917306 |
| H | -8.25957734 | -2.63740676 | -0.03671404 |

Pentadienyl bromide **8a**

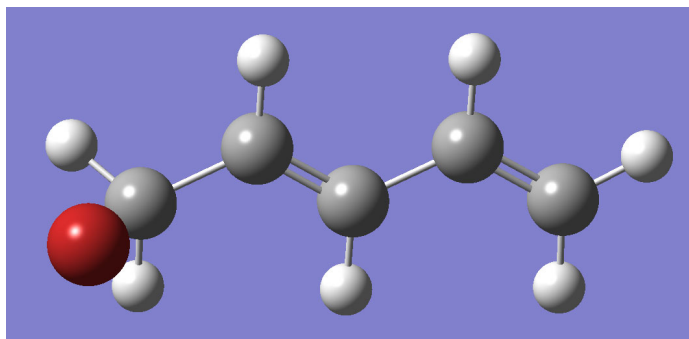

```
%chk=pentadiene3.chk  
%mem=1024MB  
%nprocs=8  
# opt b3lyp/6-311++g(d,p) scrf=(solvent=dichloromethane)
```

optimization for pentadiene

0 1

|    |             |             |             |
|----|-------------|-------------|-------------|
| C  | -1.84615387 | 0.69230768  | 0.00000000  |
| H  | -1.31299012 | -0.23539724 | 0.00000000  |
| C  | -1.17087956 | 1.86728498  | 0.00000000  |
| H  | -1.70404331 | 2.79498990  | 0.00000000  |
| C  | 0.36912044  | 1.86728498  | 0.00000000  |
| H  | 0.90228419  | 0.93958006  | 0.00000000  |
| C  | 1.05136384  | 3.03822946  | 0.00000000  |
| H  | 0.52372137  | 3.96908575  | 0.00000000  |
| H  | 2.12134496  | 3.03187216  | 0.00000000  |
| C  | -3.38615387 | 0.69230768  | 0.00000000  |
| H  | -3.74282021 | 1.19501568  | 0.87462780  |
| H  | -3.74282072 | 1.19840360  | -0.87267157 |
| Br | -4.02281996 | -1.10845440 | -0.00349202 |

Pentadienyl cation **8a+**

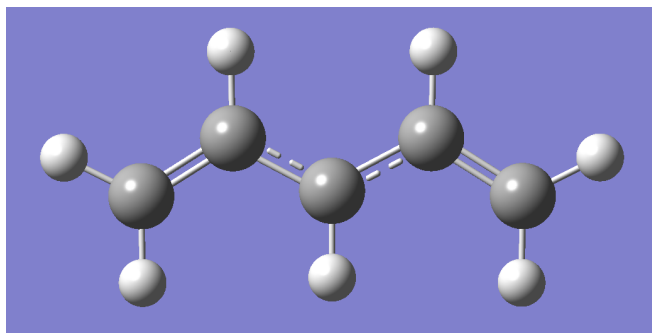

```
%chk=pentadieneion3.chk
```

```
%mem=1024MB
```

```
%nprocs=8
```

```
# opt b3lyp/6-311++g(d,p) scrf=(solvent=dichloromethane)
```

optimization for pentadiene ion

1 1

|   |             |             |             |
|---|-------------|-------------|-------------|
| C | -4.35233144 | -0.33678756 | 0.00000000  |
| H | -3.81916769 | -1.26449248 | 0.00000000  |
| C | -3.67705713 | 0.83818974  | 0.00000000  |
| H | -4.21022088 | 1.76589466  | 0.00000000  |
| C | -2.13705713 | 0.83818974  | 0.00000000  |
| H | -1.60389338 | -0.08951518 | 0.00000000  |
| C | -1.45481373 | 2.00913422  | 0.00000000  |
| H | -1.98245620 | 2.93999051  | 0.00000000  |
| H | -0.38483262 | 2.00277692  | 0.00000000  |
| C | -5.89233144 | -0.33678756 | 0.00000000  |
| H | -6.24899779 | 0.16930856  | -0.87267166 |
| H | -6.24899829 | 0.16592023  | 0.87462771  |

Pentadienyl bromide with ester **8b**

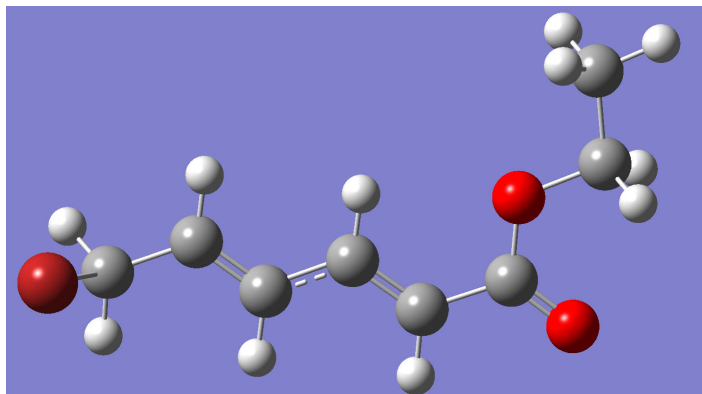

```
%chk=ethylester3.chk
%mem=1024MB
%nprocs=8
# opt b3lyp/6-311++g(d,p)  scrf=(solvent=dichloromethane)
```

Optimization for ethyl ester

|     |             |             |             |
|-----|-------------|-------------|-------------|
| 0 1 |             |             |             |
| C   | -0.41450776 | 0.25906735  | 0.00000000  |
| C   | -1.95450776 | 0.25906735  | 0.00000000  |
| H   | -2.48767150 | 1.18677227  | 0.00000000  |
| C   | -2.63675116 | -0.91187713 | 0.00000000  |
| H   | -2.10910869 | -1.84273341 | 0.00000000  |
| C   | -4.17672398 | -0.90272737 | 0.00000000  |
| H   | -4.70436645 | 0.02812891  | 0.00000000  |
| C   | -4.86591238 | -2.06959771 | 0.00000000  |
| H   | -4.34380982 | -3.00357250 | 0.00000000  |
| O   | 0.21253267  | 1.35011770  | 0.00000000  |
| O   | 0.29803819  | -0.98076259 | 0.00000000  |
| C   | 1.70460386  | -0.72295222 | -0.00261381 |
| H   | 1.96290100  | -0.16271150 | -0.87686373 |
| H   | 1.96607541  | -0.16231271 | 0.87043600  |
| C   | 2.47128794  | -2.05853986 | -0.00370136 |
| H   | 3.52375390  | -1.86563275 | -0.00519748 |
| H   | 2.21264423  | -2.61897836 | 0.87031930  |
| H   | 2.21016152  | -2.61898132 | -0.87698159 |
| C   | -6.40580366 | -2.05129852 | 0.00000000  |
| H   | -6.75645322 | -1.54286225 | 0.87374908  |
| H   | -6.75644971 | -1.54252396 | -0.87355355 |
| Br  | -7.06382257 | -3.84437157 | -0.00034910 |

Pentadienyl cation with ester **8a+**

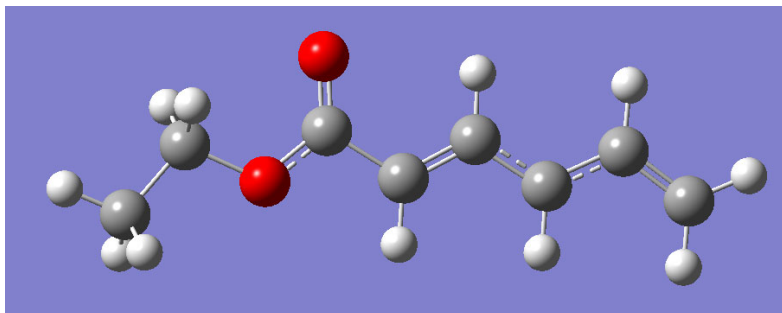

```
%chk=ethylesterion2dcm.chk
```

```
%mem=1024MB
```

```
%nprocs=8
```

```
# opt b3lyp/6-311++g(d,p) scrf=(solvent=dichloromethane)
```

optimization for ethyl ester ion (no Br)

```
1 1
```

|   |             |             |             |
|---|-------------|-------------|-------------|
| C | -2.07665031 | -0.71377475 | -1.85499308 |
| H | -3.02055188 | -1.17783702 | -1.65853435 |
| H | -1.36637849 | -1.45926666 | -2.14594972 |
| C | -1.58063216 | -0.00071868 | -0.58333392 |
| H | -1.40534453 | 1.05472597  | -0.59785424 |
| C | -1.36538336 | -0.70540626 | 0.55405362  |
| H | -1.53890475 | -1.76104112 | 0.57467801  |
| C | -0.86933885 | 0.01561205  | 1.82120492  |
| H | -0.69581746 | 1.07124692  | 1.80058053  |
| C | -0.65183749 | -0.68230884 | 2.96233008  |
| H | -0.82358650 | -1.73809665 | 2.98905783  |
| C | -0.15578412 | 0.04664626  | 4.22492879  |
| O | 0.04829000  | 1.28815179  | 4.20067296  |
| O | 0.07372218  | -0.68979624 | 5.42903813  |
| C | 0.52679830  | 0.19927053  | 6.45333413  |
| H | -0.21657108 | 0.94835583  | 6.62989340  |
| H | 1.43760273  | 0.66692810  | 6.14247776  |
| C | 0.77374500  | -0.59447336 | 7.74970907  |
| H | 1.11276075  | 0.07077228  | 8.51614013  |
| H | -0.13705969 | -1.06213038 | 8.06056550  |
| H | 1.51711376  | -1.34355914 | 7.57314922  |

Pentadienyl bromide with phenyl ketone **8c**

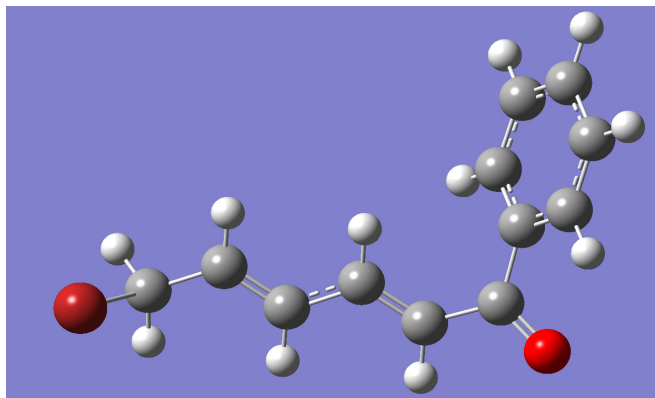

```
%chk=phenylketone3.chk
%mem=1024MB
%nprocs=8
# opt b3lyp/6-311++g(d,p)  scrf=(solvent=dichloromethane)

optimization for phenyl ketone

0 1
Br          -5.61538468   -0.64102563    0.00000000
C           -7.52538468   -0.64102563    0.00000000
H           -7.88205103   -0.10644012   -0.85551590
H           -7.88205153   -1.64921670   -0.03520681
C           -8.03871755    0.04061221    1.28197473
H           -7.34178996    0.42177894    1.99884561
C           -9.37010899    0.15934678    1.50528168
H          -10.07184814   -0.21986927    0.79207950
C           -9.87480633    0.84240444    2.78992670
H           -9.17306717    1.22162049    3.50312888
C          -11.20467161    0.96485059    3.02021412
H          -11.91119756    0.58759861    2.31070581
C          -11.70071560    1.64930395    4.30748408
O          -12.93412979    1.76644640    4.52779671
C          -10.68384649    2.19226475    5.32864557
C           -9.31585579    2.06363210    5.08672303
C          -11.13041427    2.81272736    6.49532954
C           -8.39471245    2.55477838    6.01165114
H           -8.96411222    1.57373472    4.16720206
C          -10.20911971    3.30495673    7.42017356
H          -12.20856866    2.91435312    6.68607633
C           -8.84144221    3.17596780    7.17860134
H           -7.31643193    2.45286562    5.82133187
H          -10.56151092    3.79448432    8.33976989
H           -8.11496624    3.56319355    7.90770025
```

Pentadienyl cation with phenyl ketone **8c+**

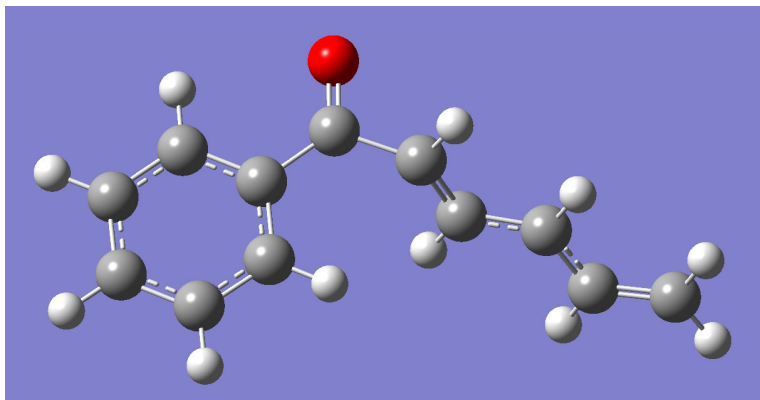

```
%chk=phenylketoneion3.chk
%mem=1024MB
%nprocs=8
# opt b3lyp/6-311++g(d,p)  scrf=(solvent=dichloromethane)

optimization for phenyl ketone ion

1 1
C          -7.52538468   -0.64102563    0.00000000
H          -7.88205103   -0.10644012   -0.85551590
H          -7.88205153   -1.64921670   -0.03520681
C          -8.03871755    0.04061221    1.28197473
H          -7.34178996    0.42177894    1.99884561
C          -9.37010899    0.15934678    1.50528168
H          -10.07184814   -0.21986927    0.79207950
C          -9.87480633    0.84240444    2.78992670
H          -9.17306717    1.22162049    3.50312888
C          -11.20467161    0.96485059    3.02021412
H          -11.91119756    0.58759861    2.31070581
C          -11.70071560    1.64930395    4.30748408
O          -12.93412979    1.76644640    4.52779671
C          -10.68384649    2.19226475    5.32864557
C          -9.31585579     2.06363210    5.08672303
C          -11.13041427    2.81272736    6.49532954
C          -8.39471245     2.55477838    6.01165114
H          -8.96411222     1.57373472    4.16720206
C          -10.20911971    3.30495673    7.42017356
H          -12.20856866    2.91435312    6.68607633
C          -8.84144221     3.17596780    7.17860134
H          -7.31643193     2.45286562    5.82133187
H          -10.56151092    3.79448432    8.33976989
H          -8.11496624     3.56319355    7.90770025
```

# Et 4-bromocrotonate 9

```
%chk=butene-ethylester.chk
%mem=1024MB
%nprocs=8
# opt b3lyp/6-311++g(d,p) scrf=(solvent=dichloromethane)

optimization for butene with ethyl ester

0 1
Br      -4.15384620    0.07692308    0.00000000
C       -6.06384620    0.07692308    0.00000000
H       -6.42051255    0.55052859    0.89072270
H       -6.42051255    0.61150859   -0.85551590
C       -6.57717980   -1.37411828   -0.05067148
H       -5.88025262   -2.18553040   -0.07900646
C       -7.90857136   -1.62687438   -0.05949811
H       -8.60997214   -0.81937431   -0.08917306
C       -8.41375754   -3.08128547   -0.02670608
O       -9.81702773   -3.35633174   -0.03577927
O       -7.58885778   -4.03096591    0.00819387
C      -10.02631220   -4.77085091   -0.02043243
H       -9.59208165   -5.18606084    0.86497400
H       -9.56710181   -5.20871108   -0.88200327
C      -11.53758231   -5.06639550   -0.03821057
H      -11.69419467   -6.12479801   -0.02569323
H      -11.99695675   -4.62766303    0.82282889
H      -11.97163339   -4.65207125   -0.92411975
```

## Gamma carbonyl cation with ester 9+

```
%chk=butene-ethylesterion.chk
%mem=1024MB
%nprocs=8
# opt b3lyp/6-311++g(d,p) scrf=(solvent=dichloromethane)

optimization for butene with ethyl ester

1 1
C      -6.06384620    0.07692308    0.00000000
H      -6.42051255    0.55052859    0.89072270
H      -6.42051255    0.61150859   -0.85551590
C      -6.57717980   -1.37411828   -0.05067148
H      -5.88025262   -2.18553040   -0.07900646
C      -7.90857136   -1.62687438   -0.05949811
H      -8.60997214   -0.81937431   -0.08917306
C      -8.41375754   -3.08128547   -0.02670608
O      -9.81702773   -3.35633174   -0.03577927
O      -7.58885778   -4.03096591    0.00819387
C     -10.02631220   -4.77085091   -0.02043243
H     -9.59208165   -5.18606084    0.86497400
H     -9.56710181   -5.20871108   -0.88200327
C     -11.53758231   -5.06639550   -0.03821057
H     -11.69419467   -6.12479801   -0.02569323
H     -11.99695675   -4.62766303    0.82282889
H     -11.97163339   -4.65207125   -0.92411975
```
